# Supplementary material for: Immunological Misfiring and Sex Differences/Similarities in Early COVID-19 Studies: Missed Opportunities of Making a Real IMPACT
Source: MDPI journal article supplement (doi:10.3390/cells12222591), 2023-11-08

Fig. S1 a.

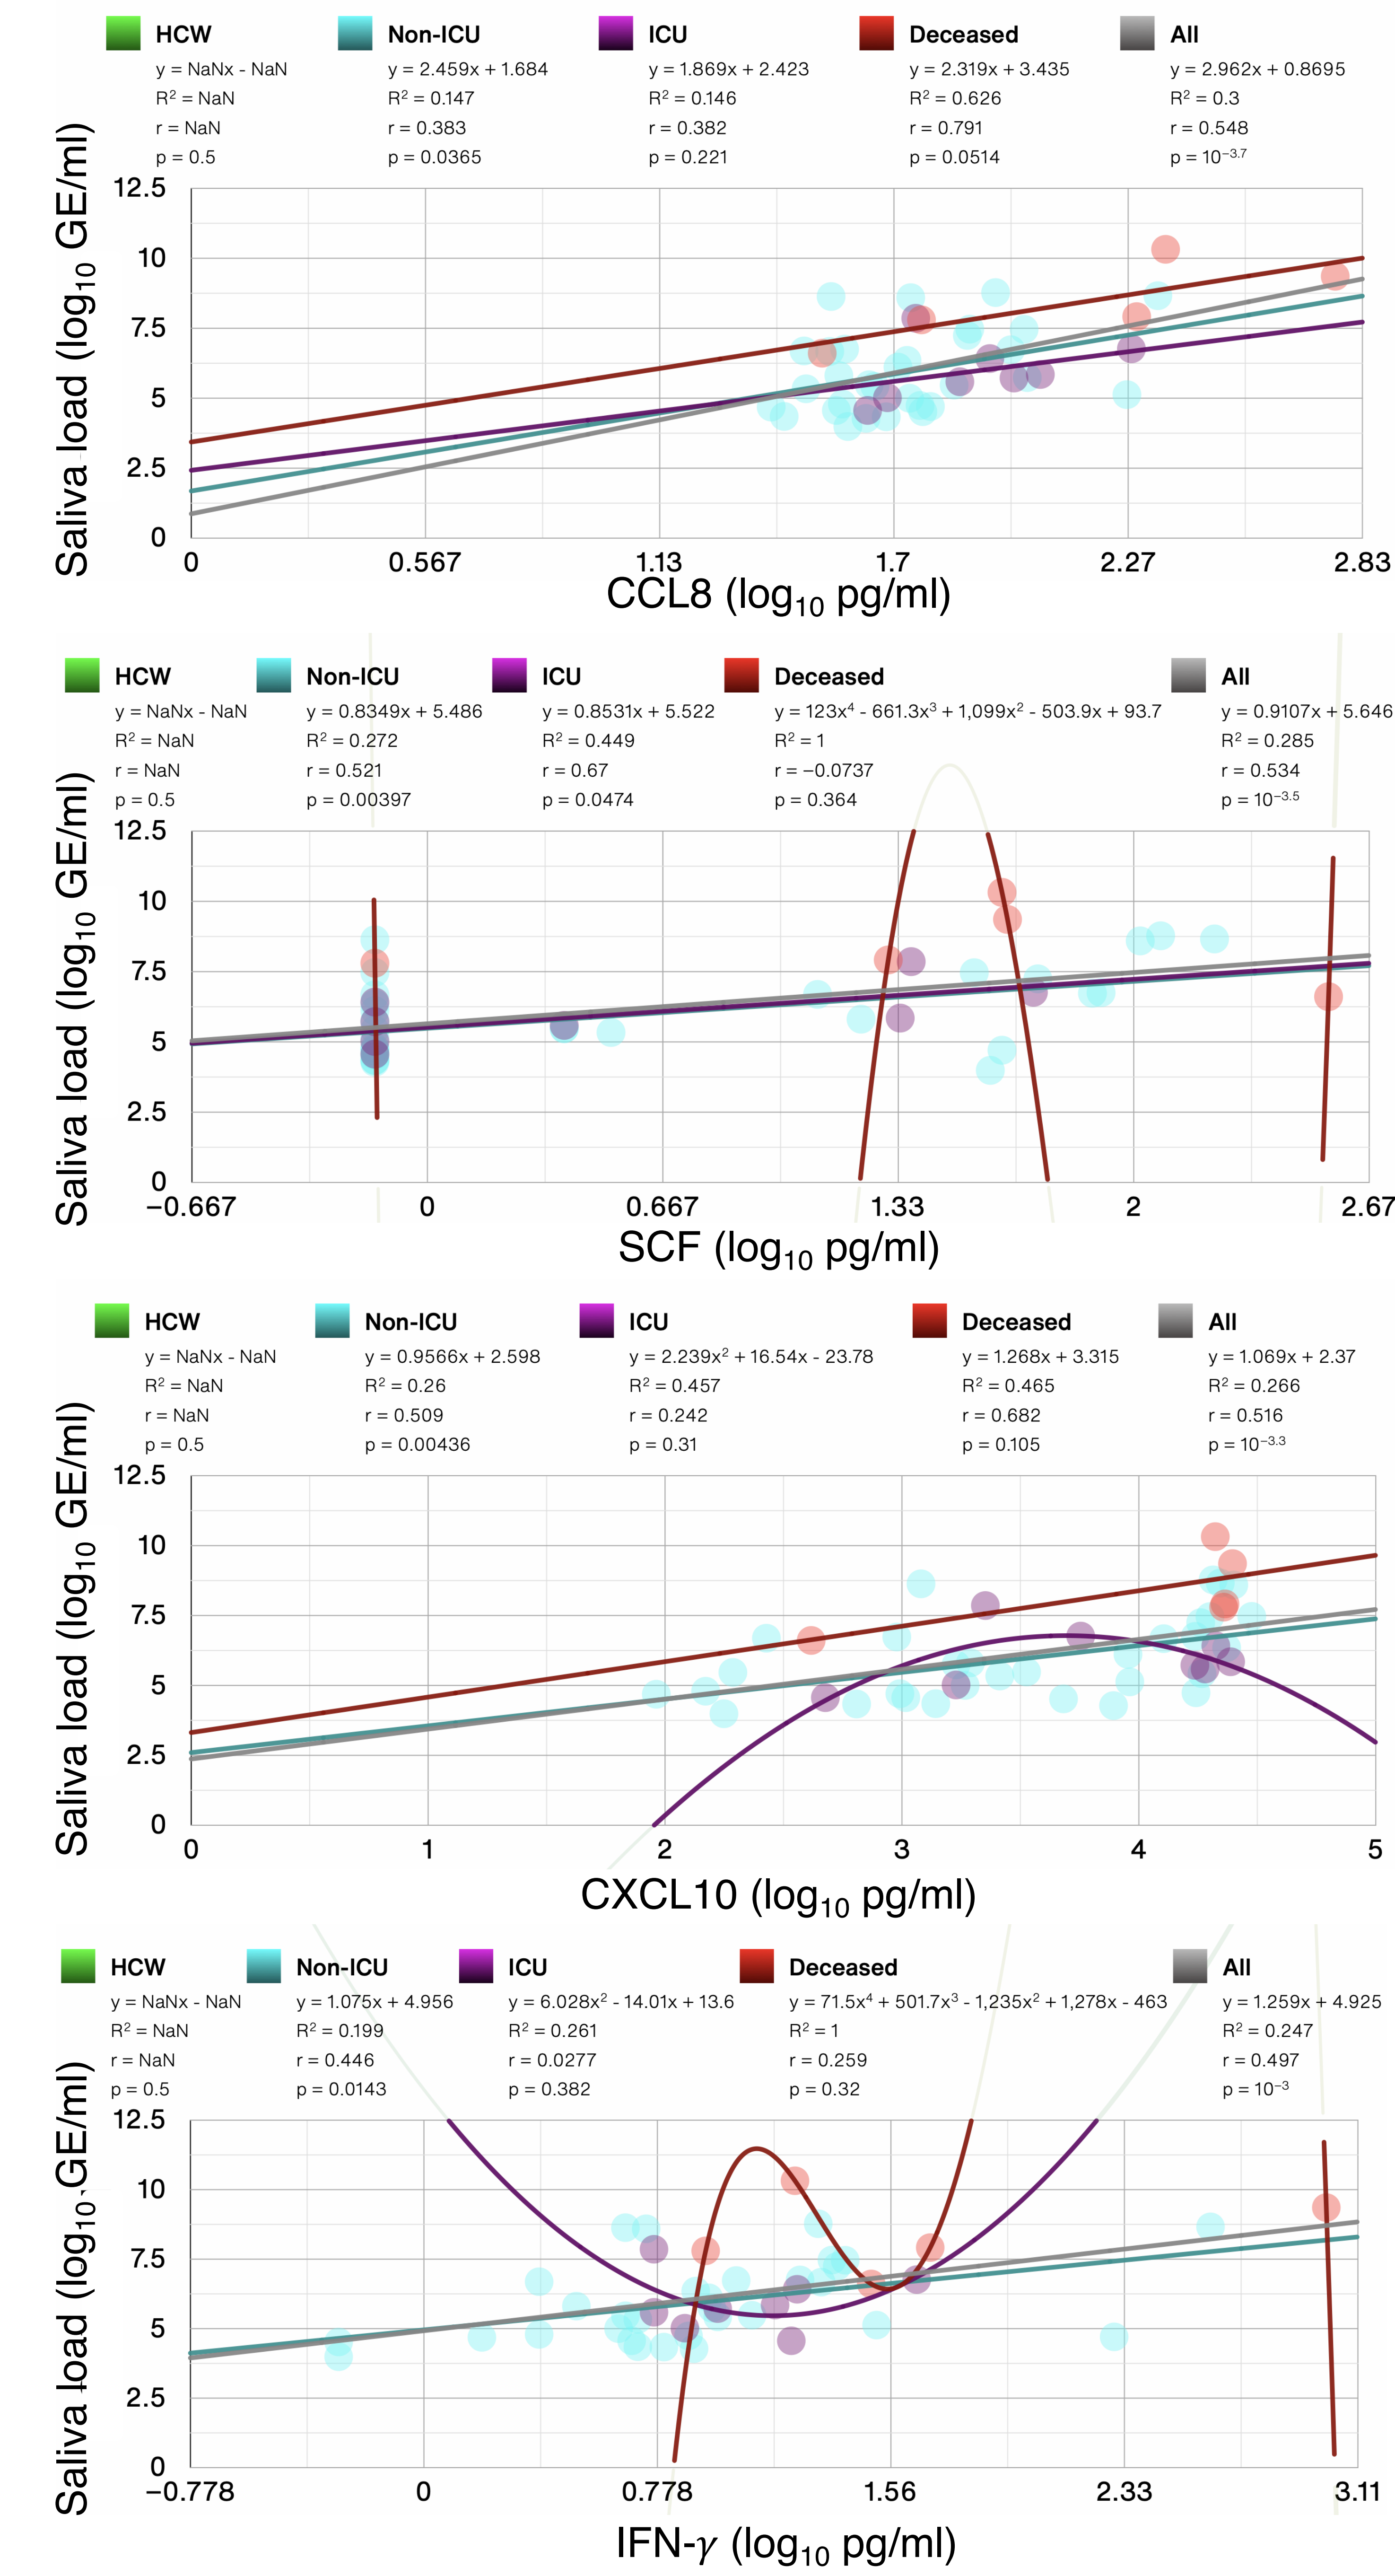

b.

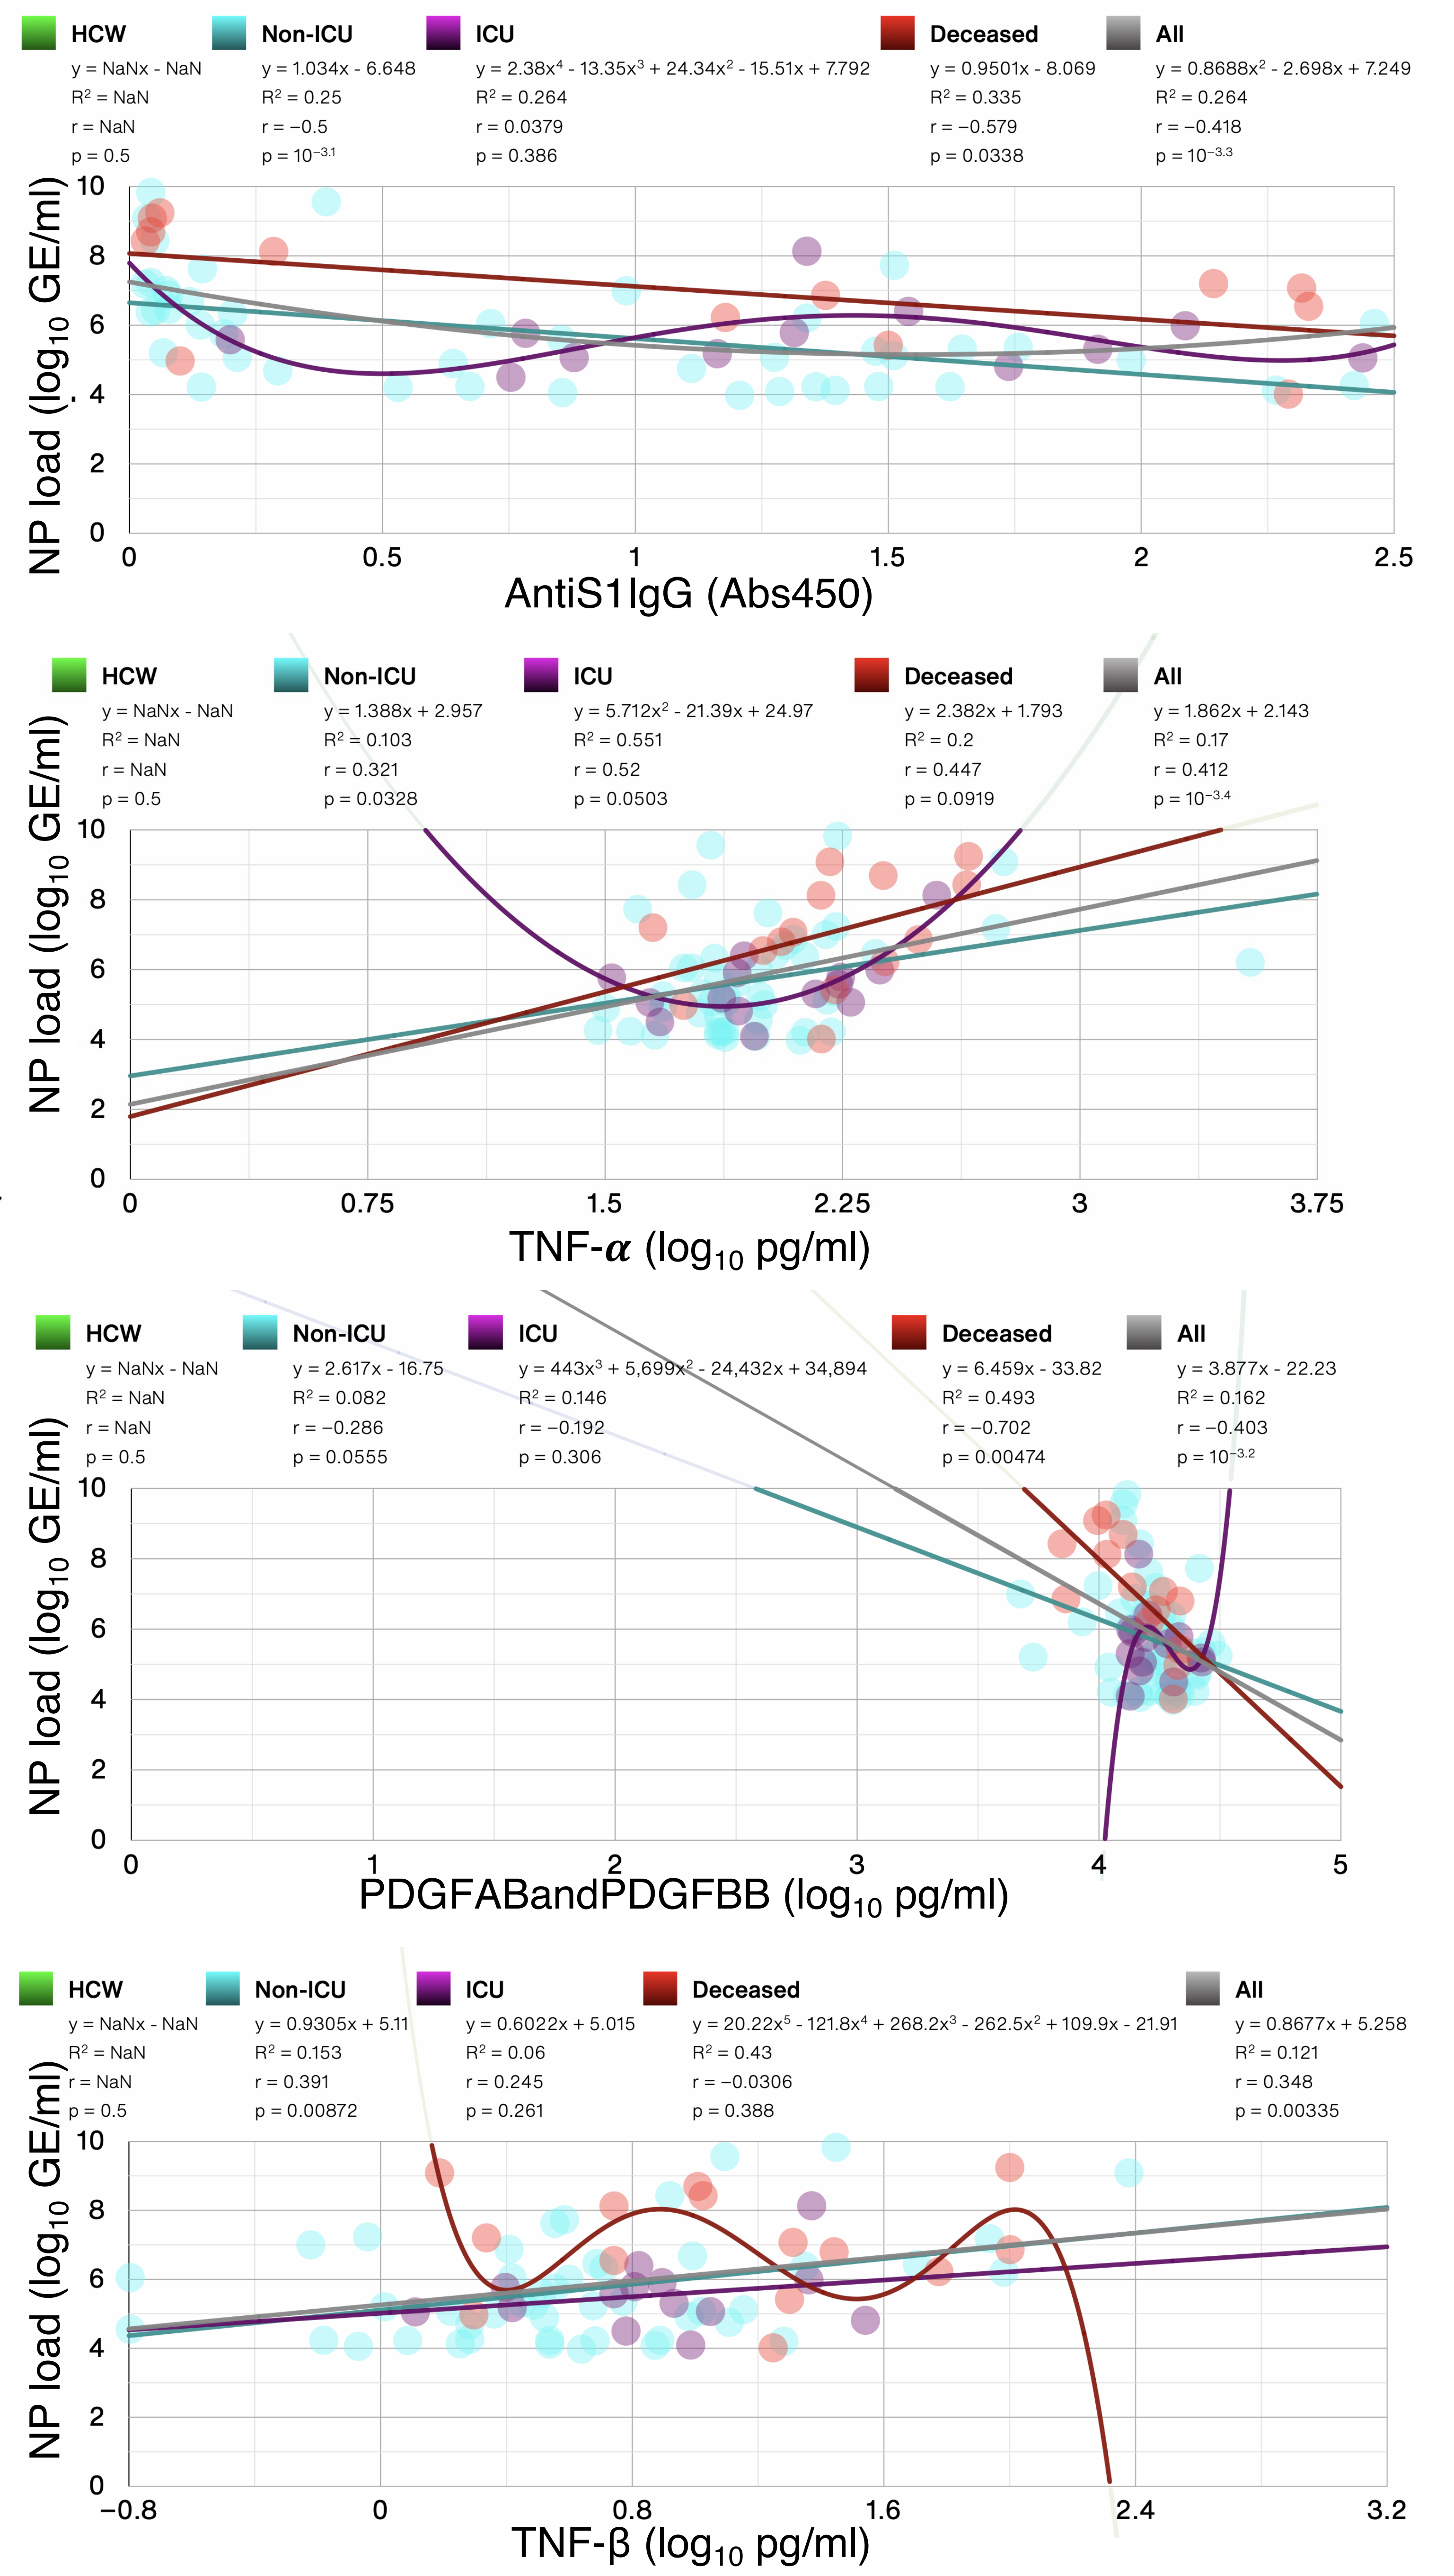



Fig.S2

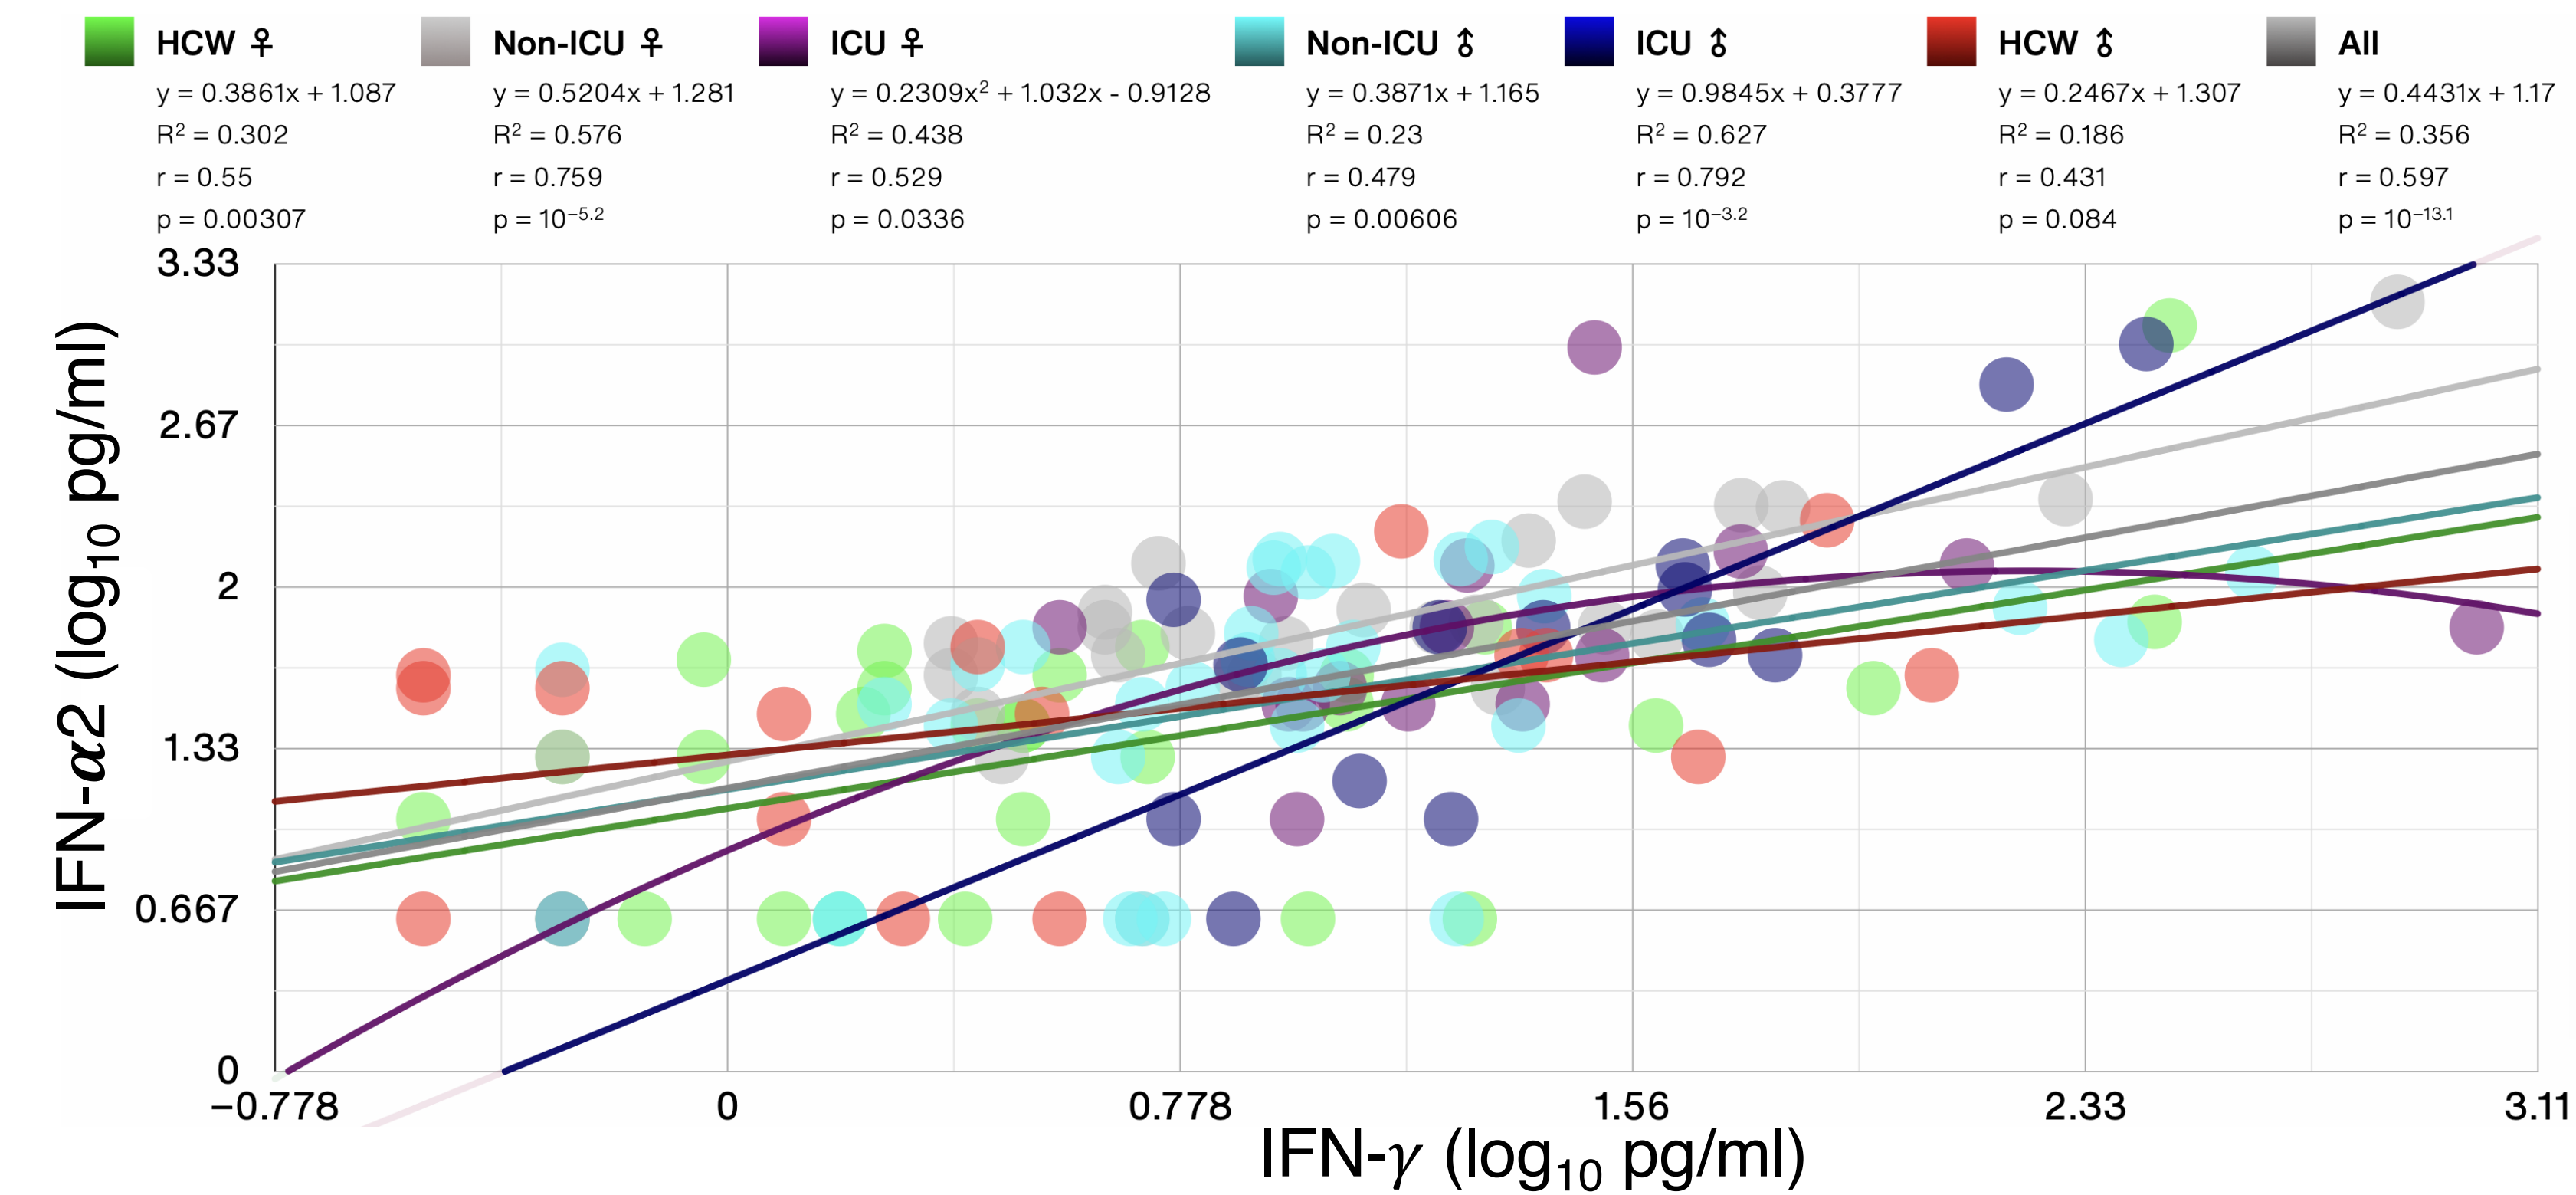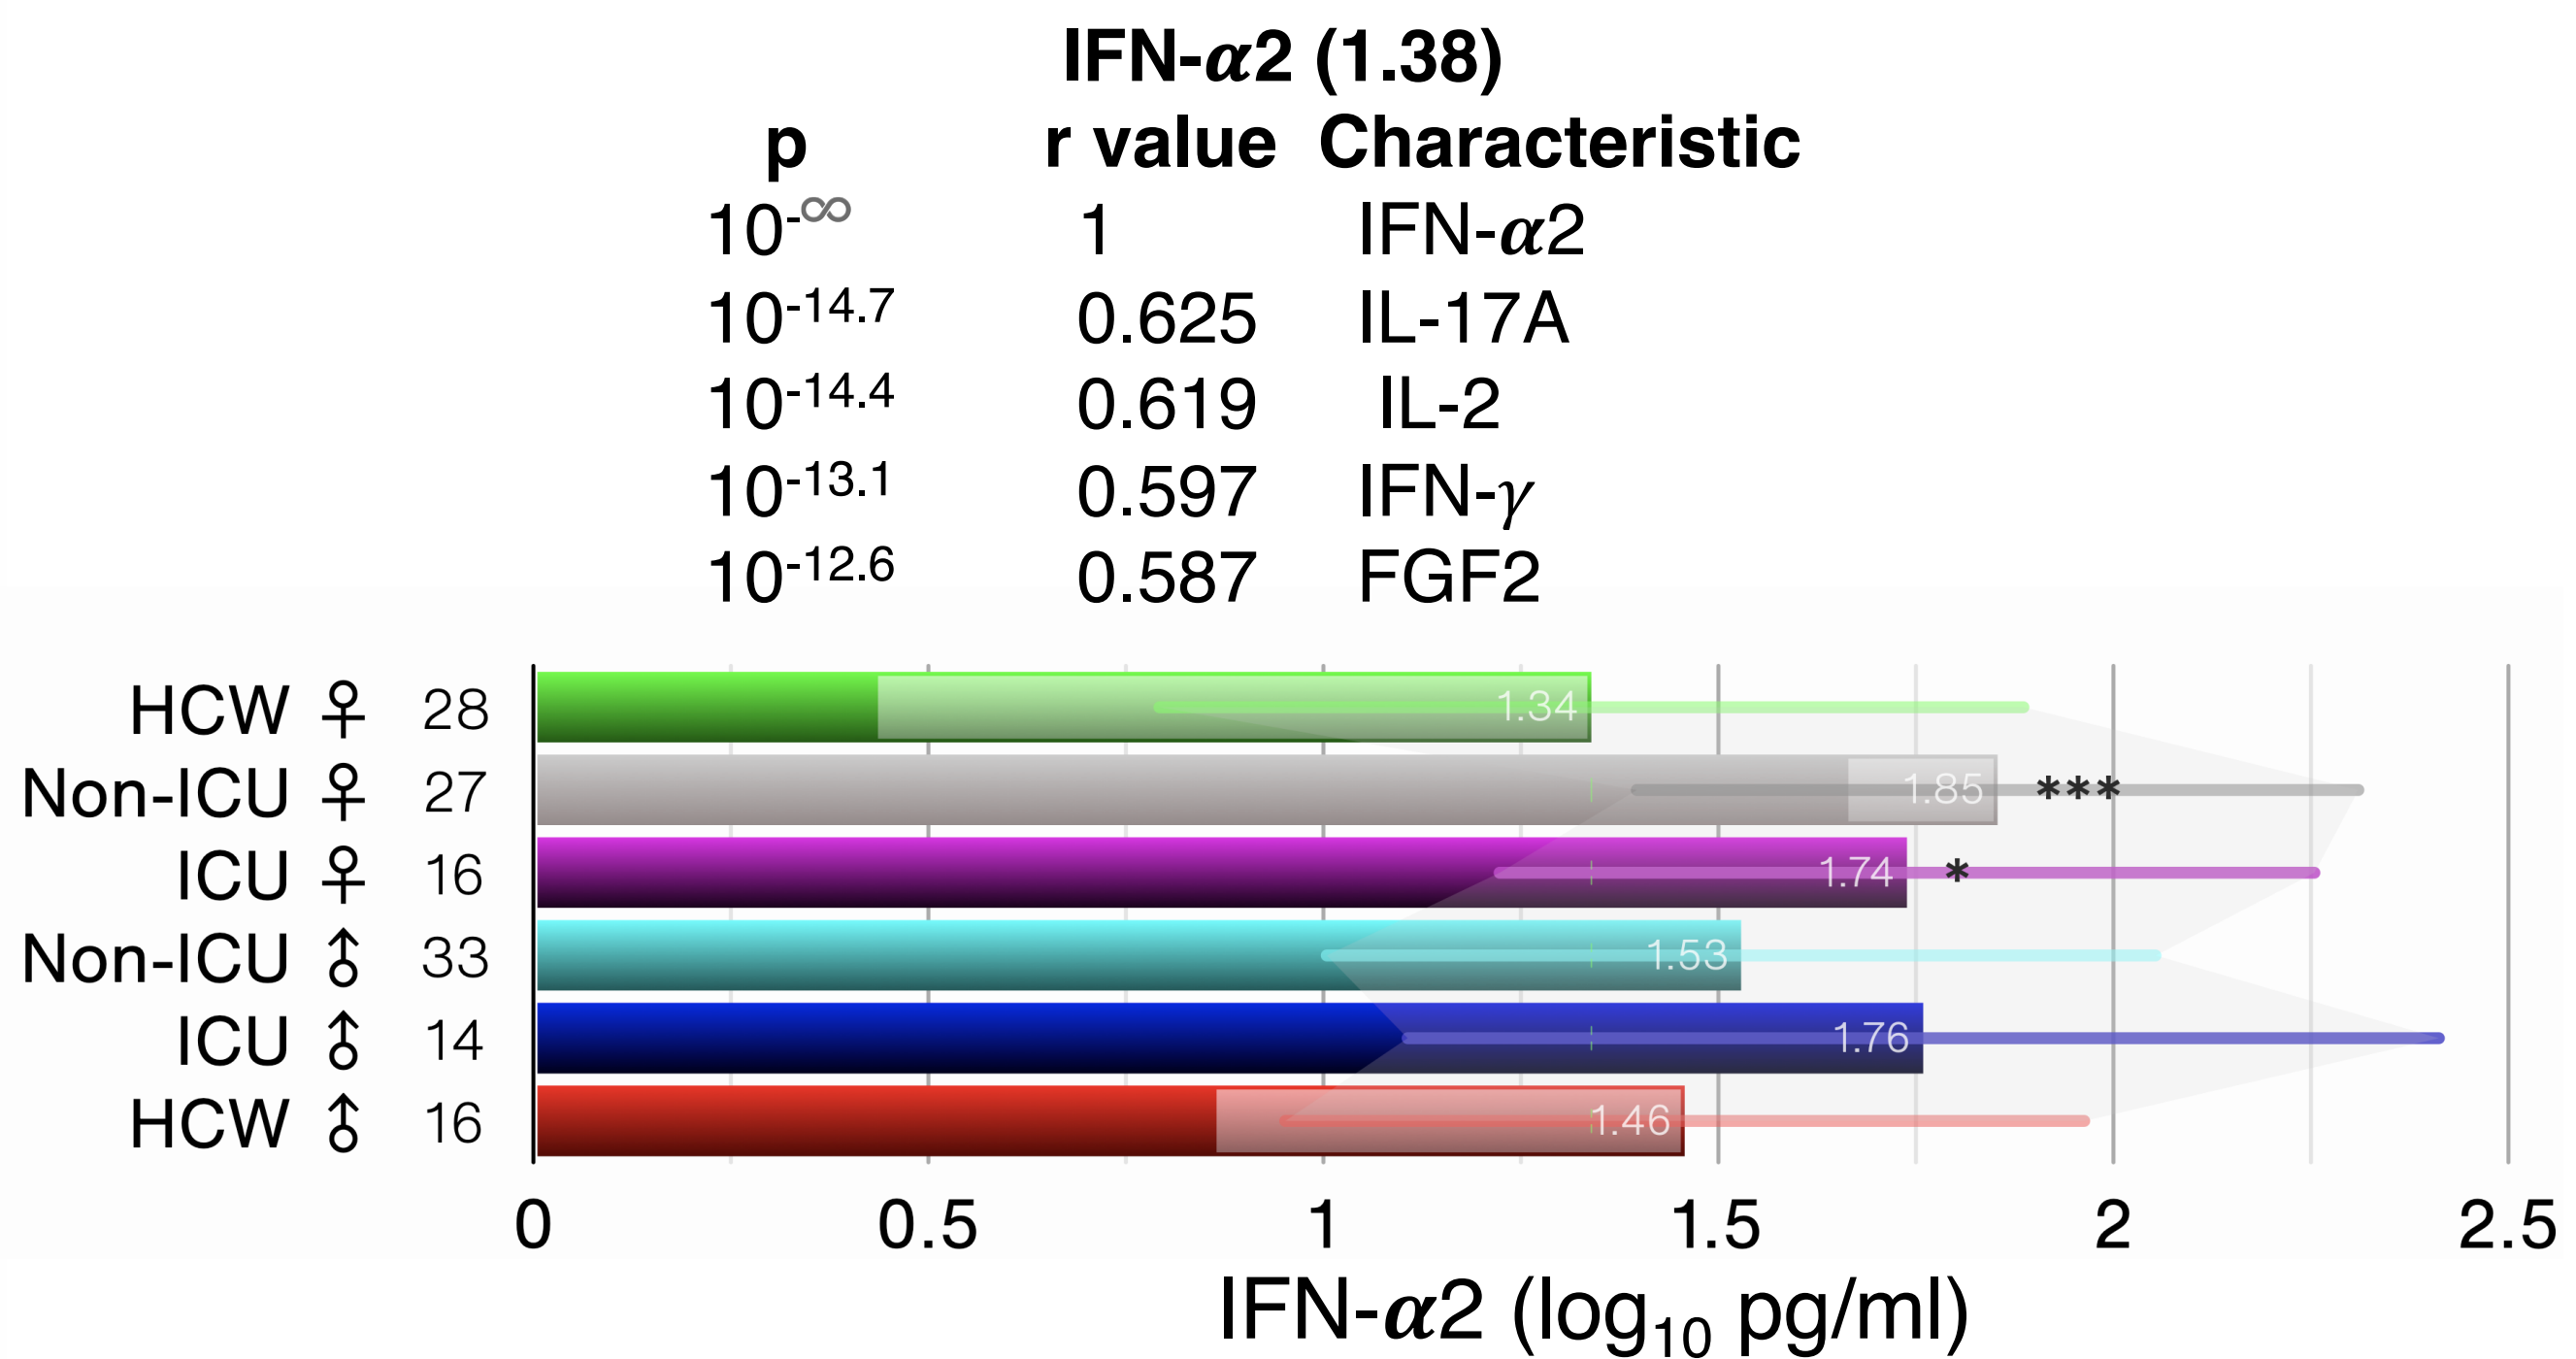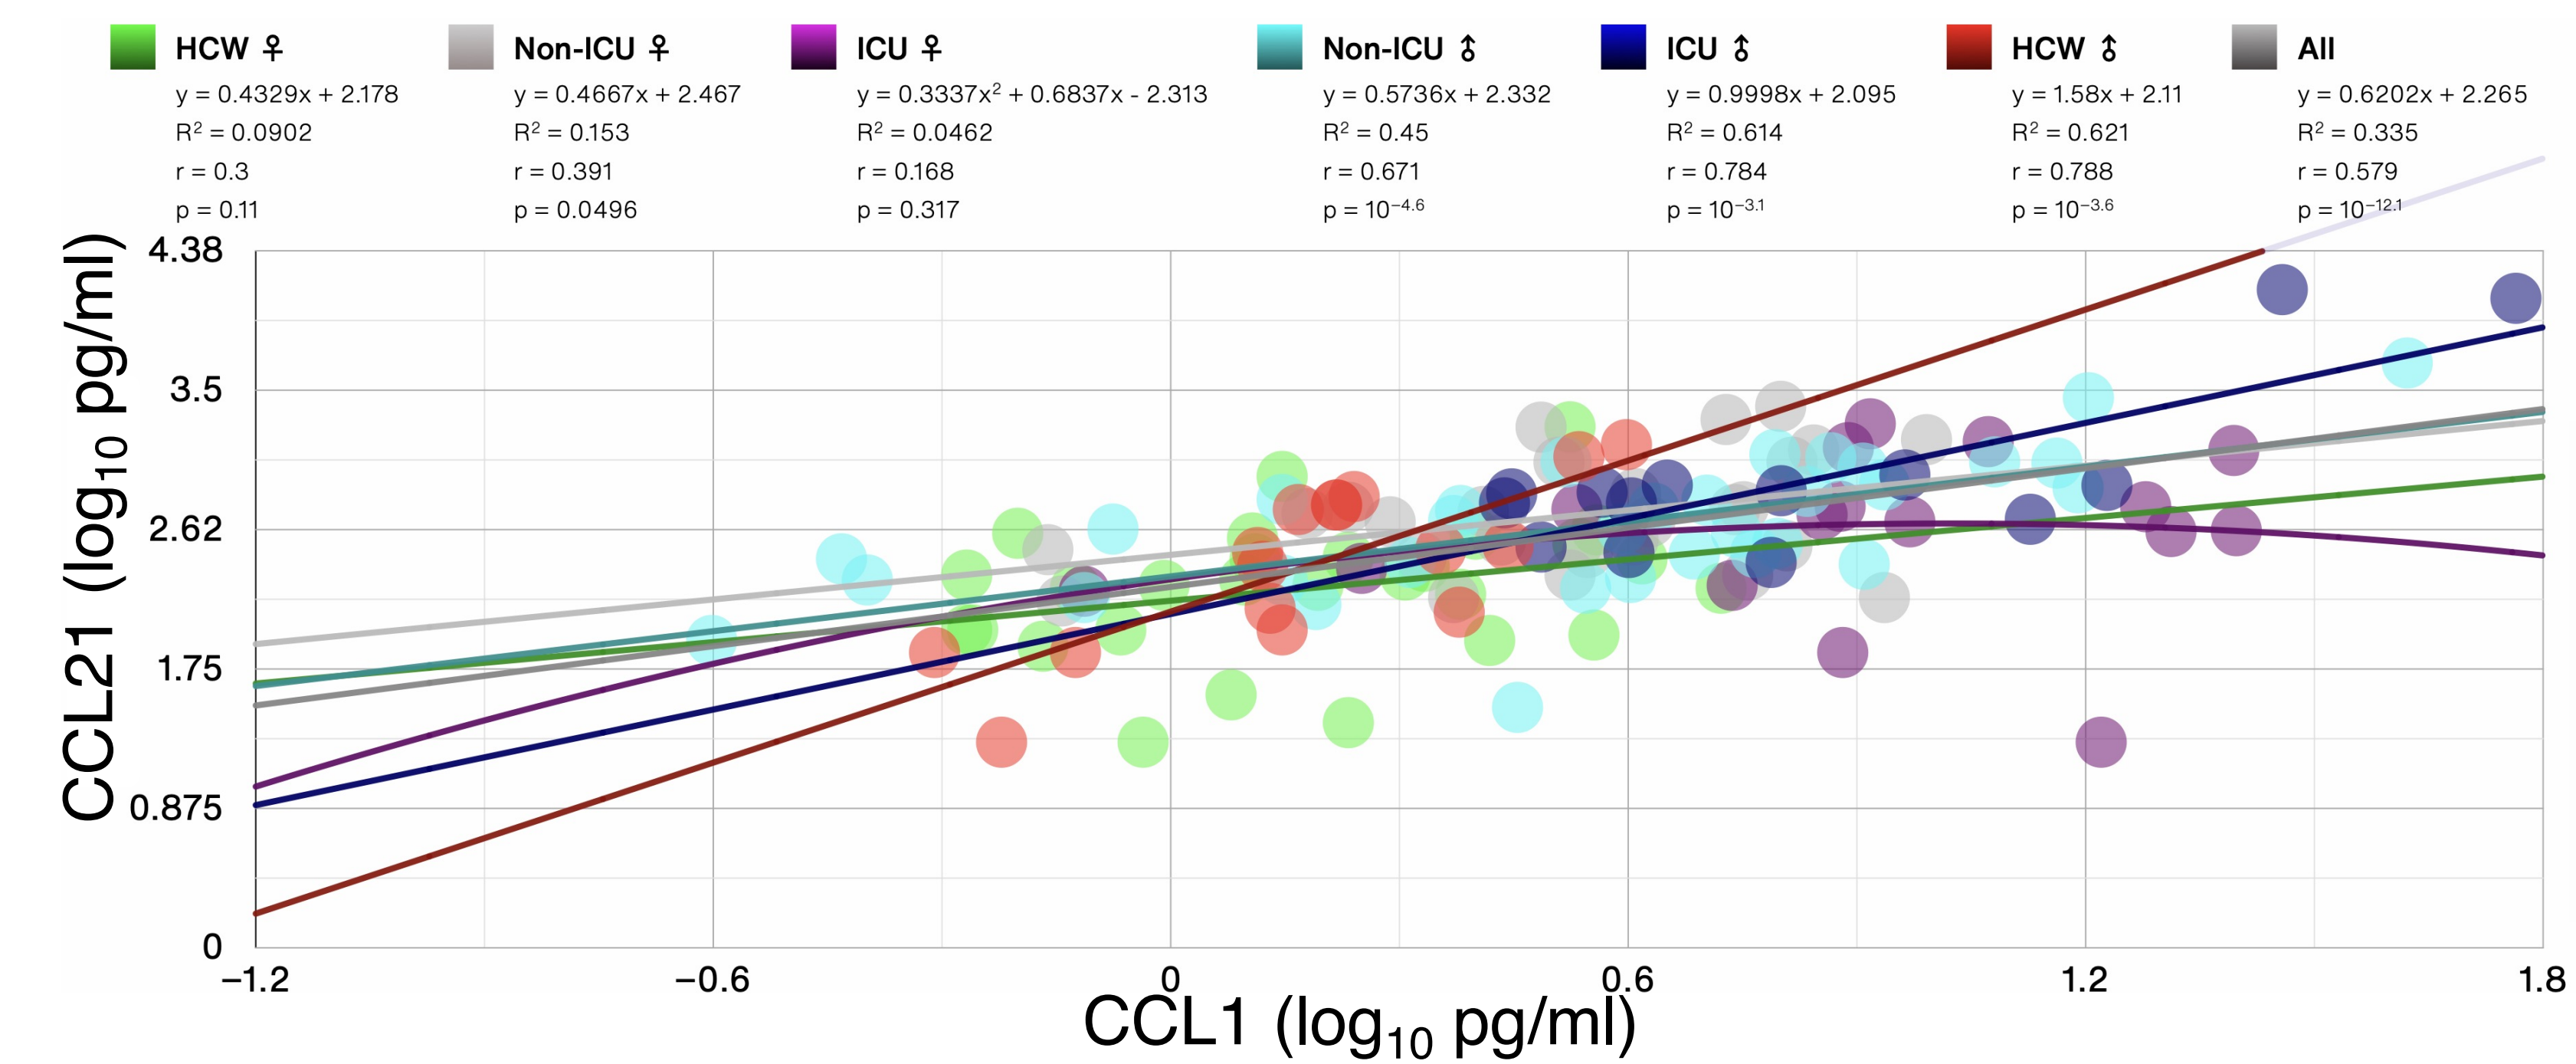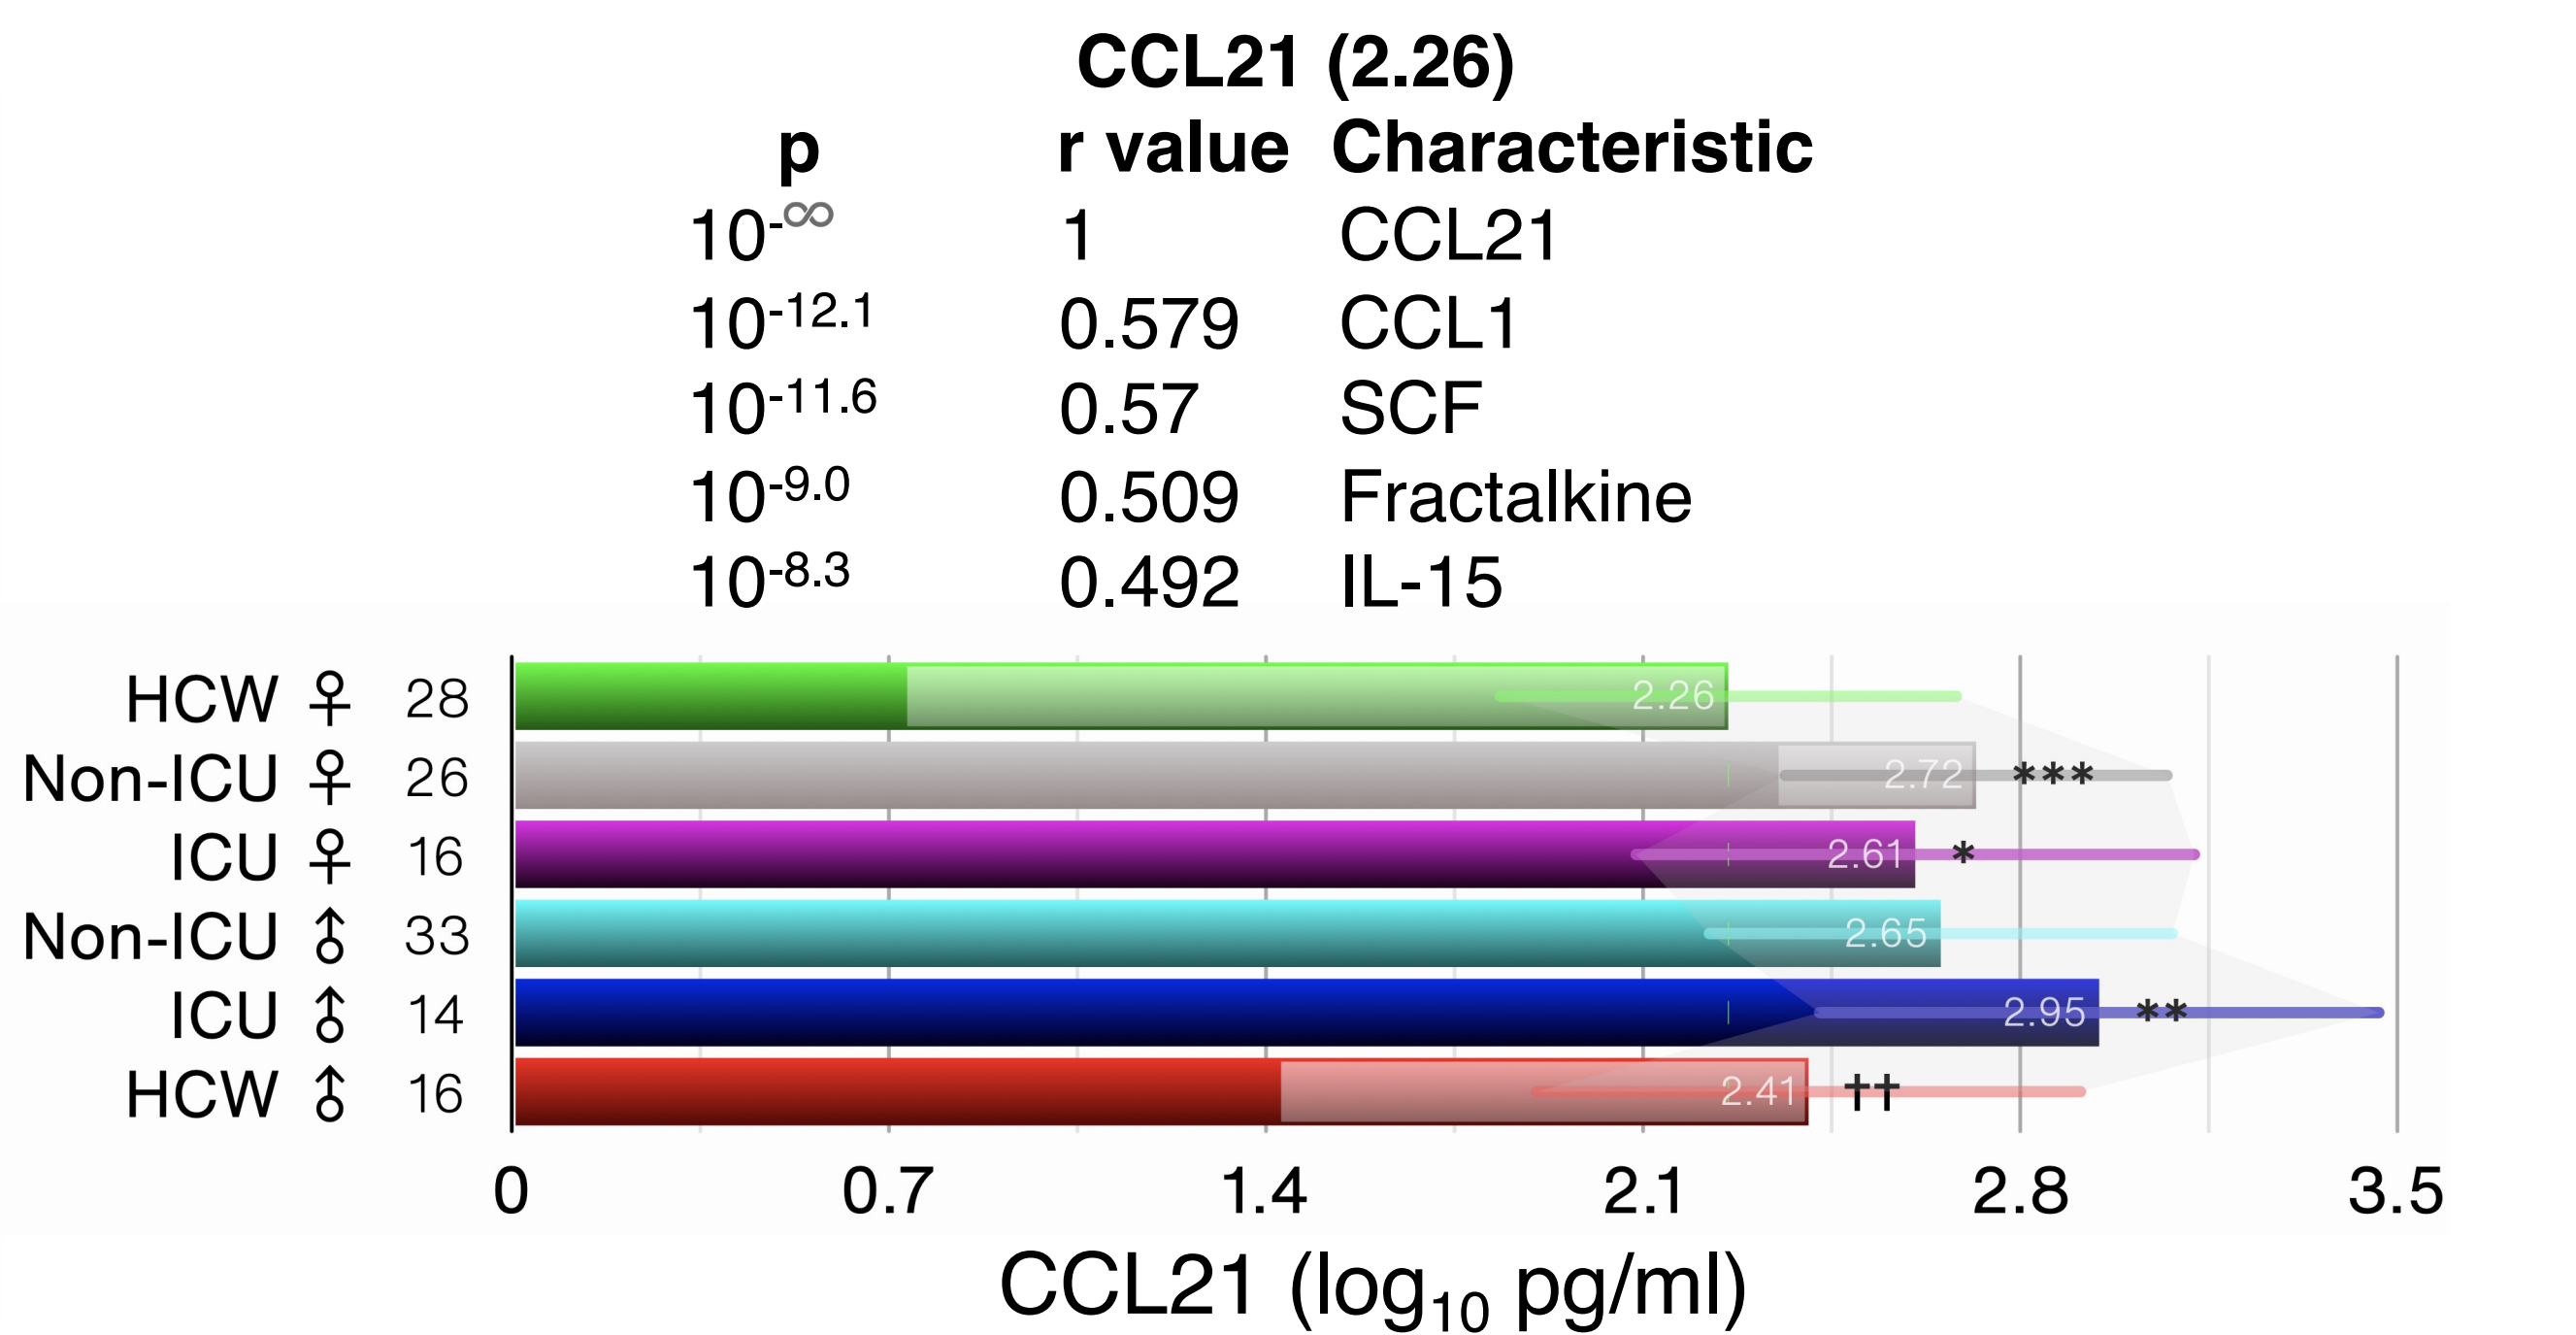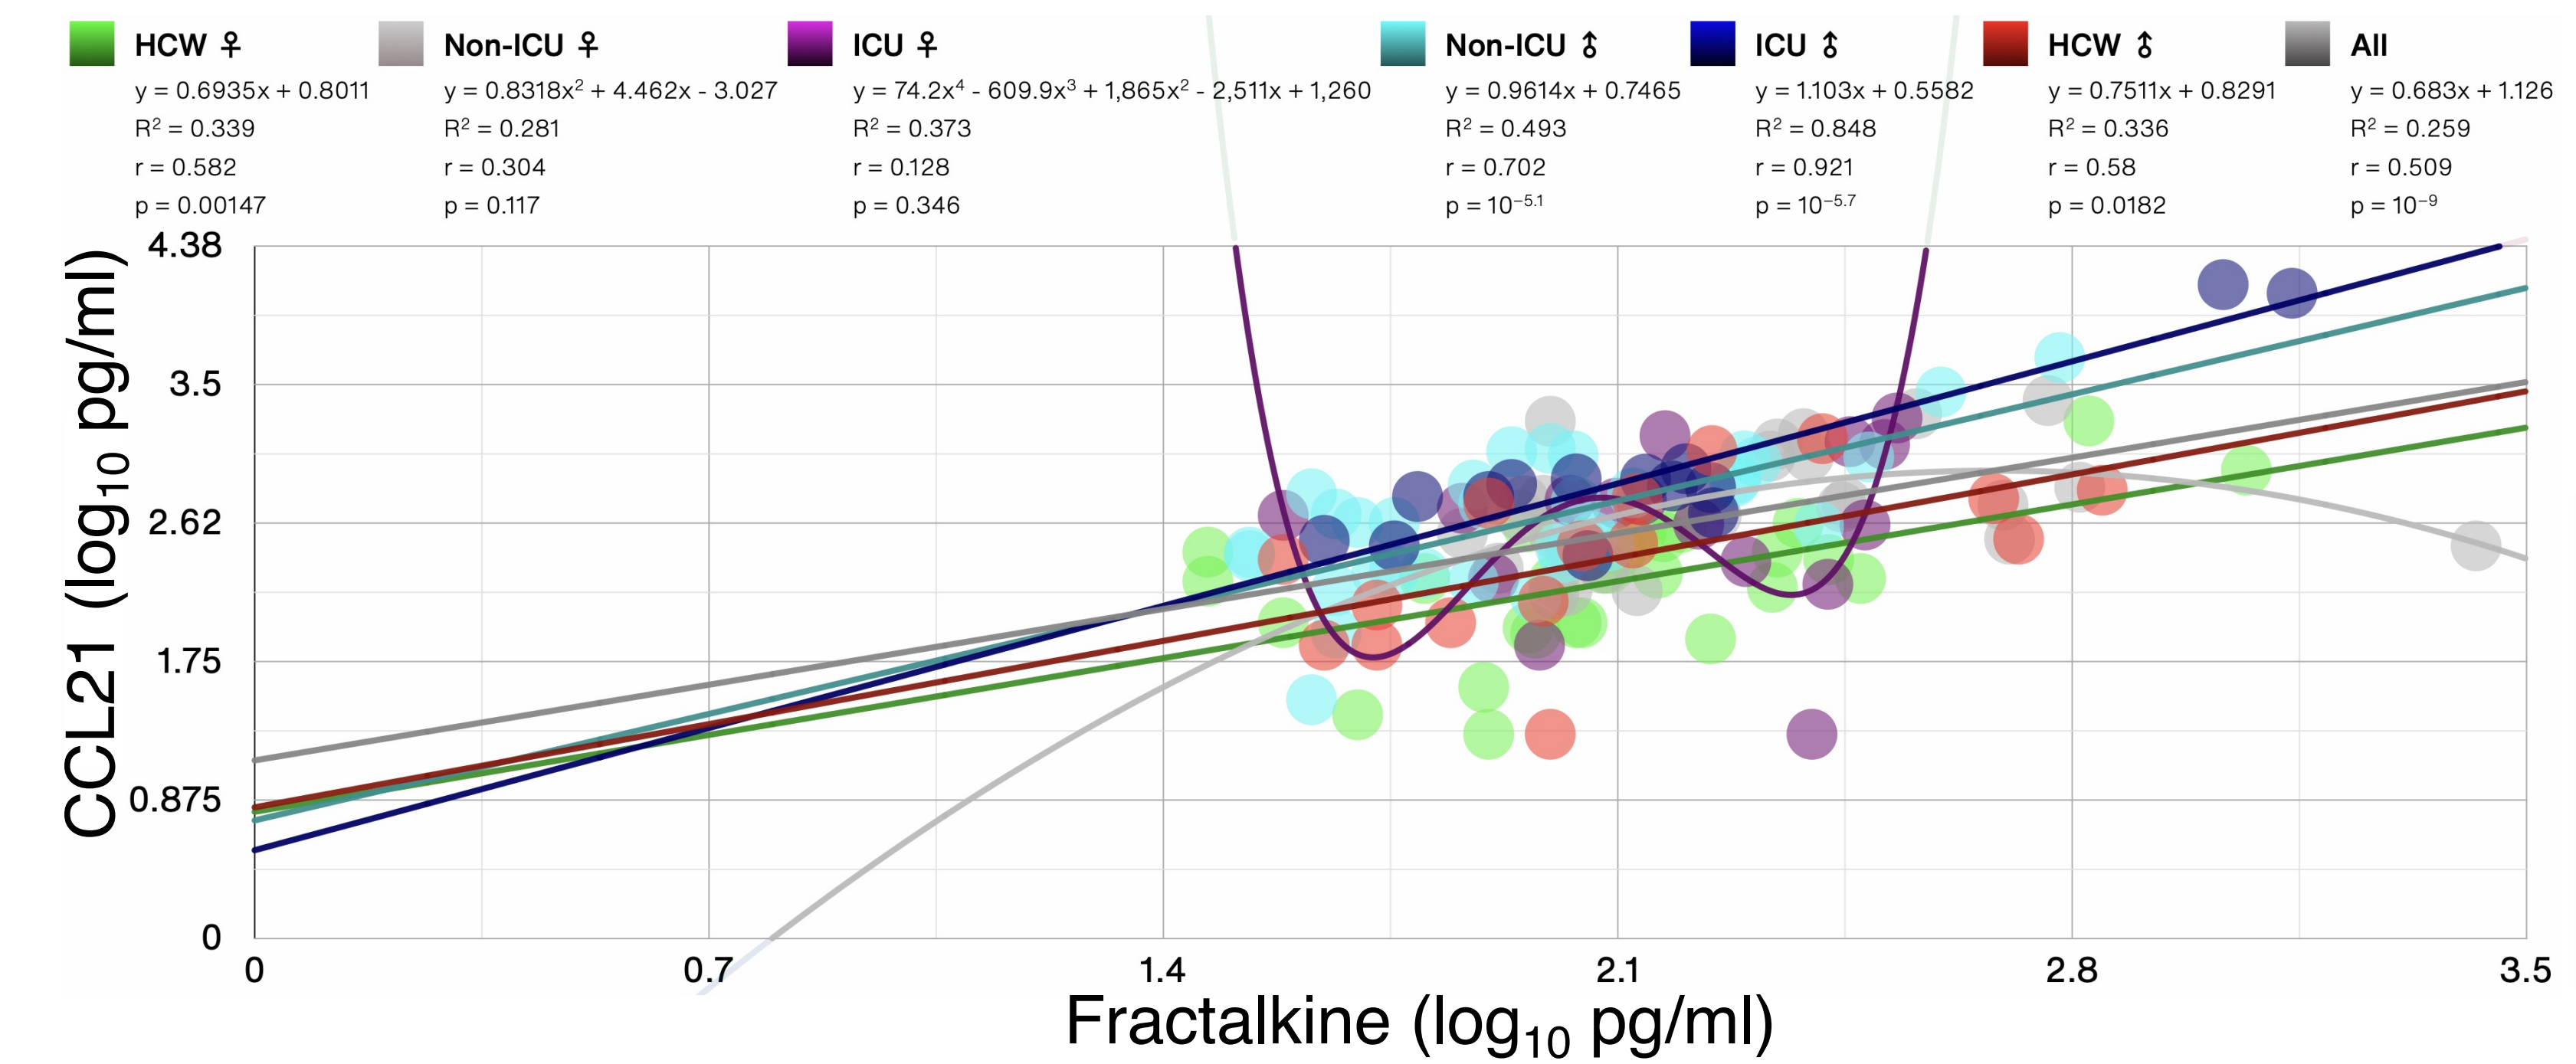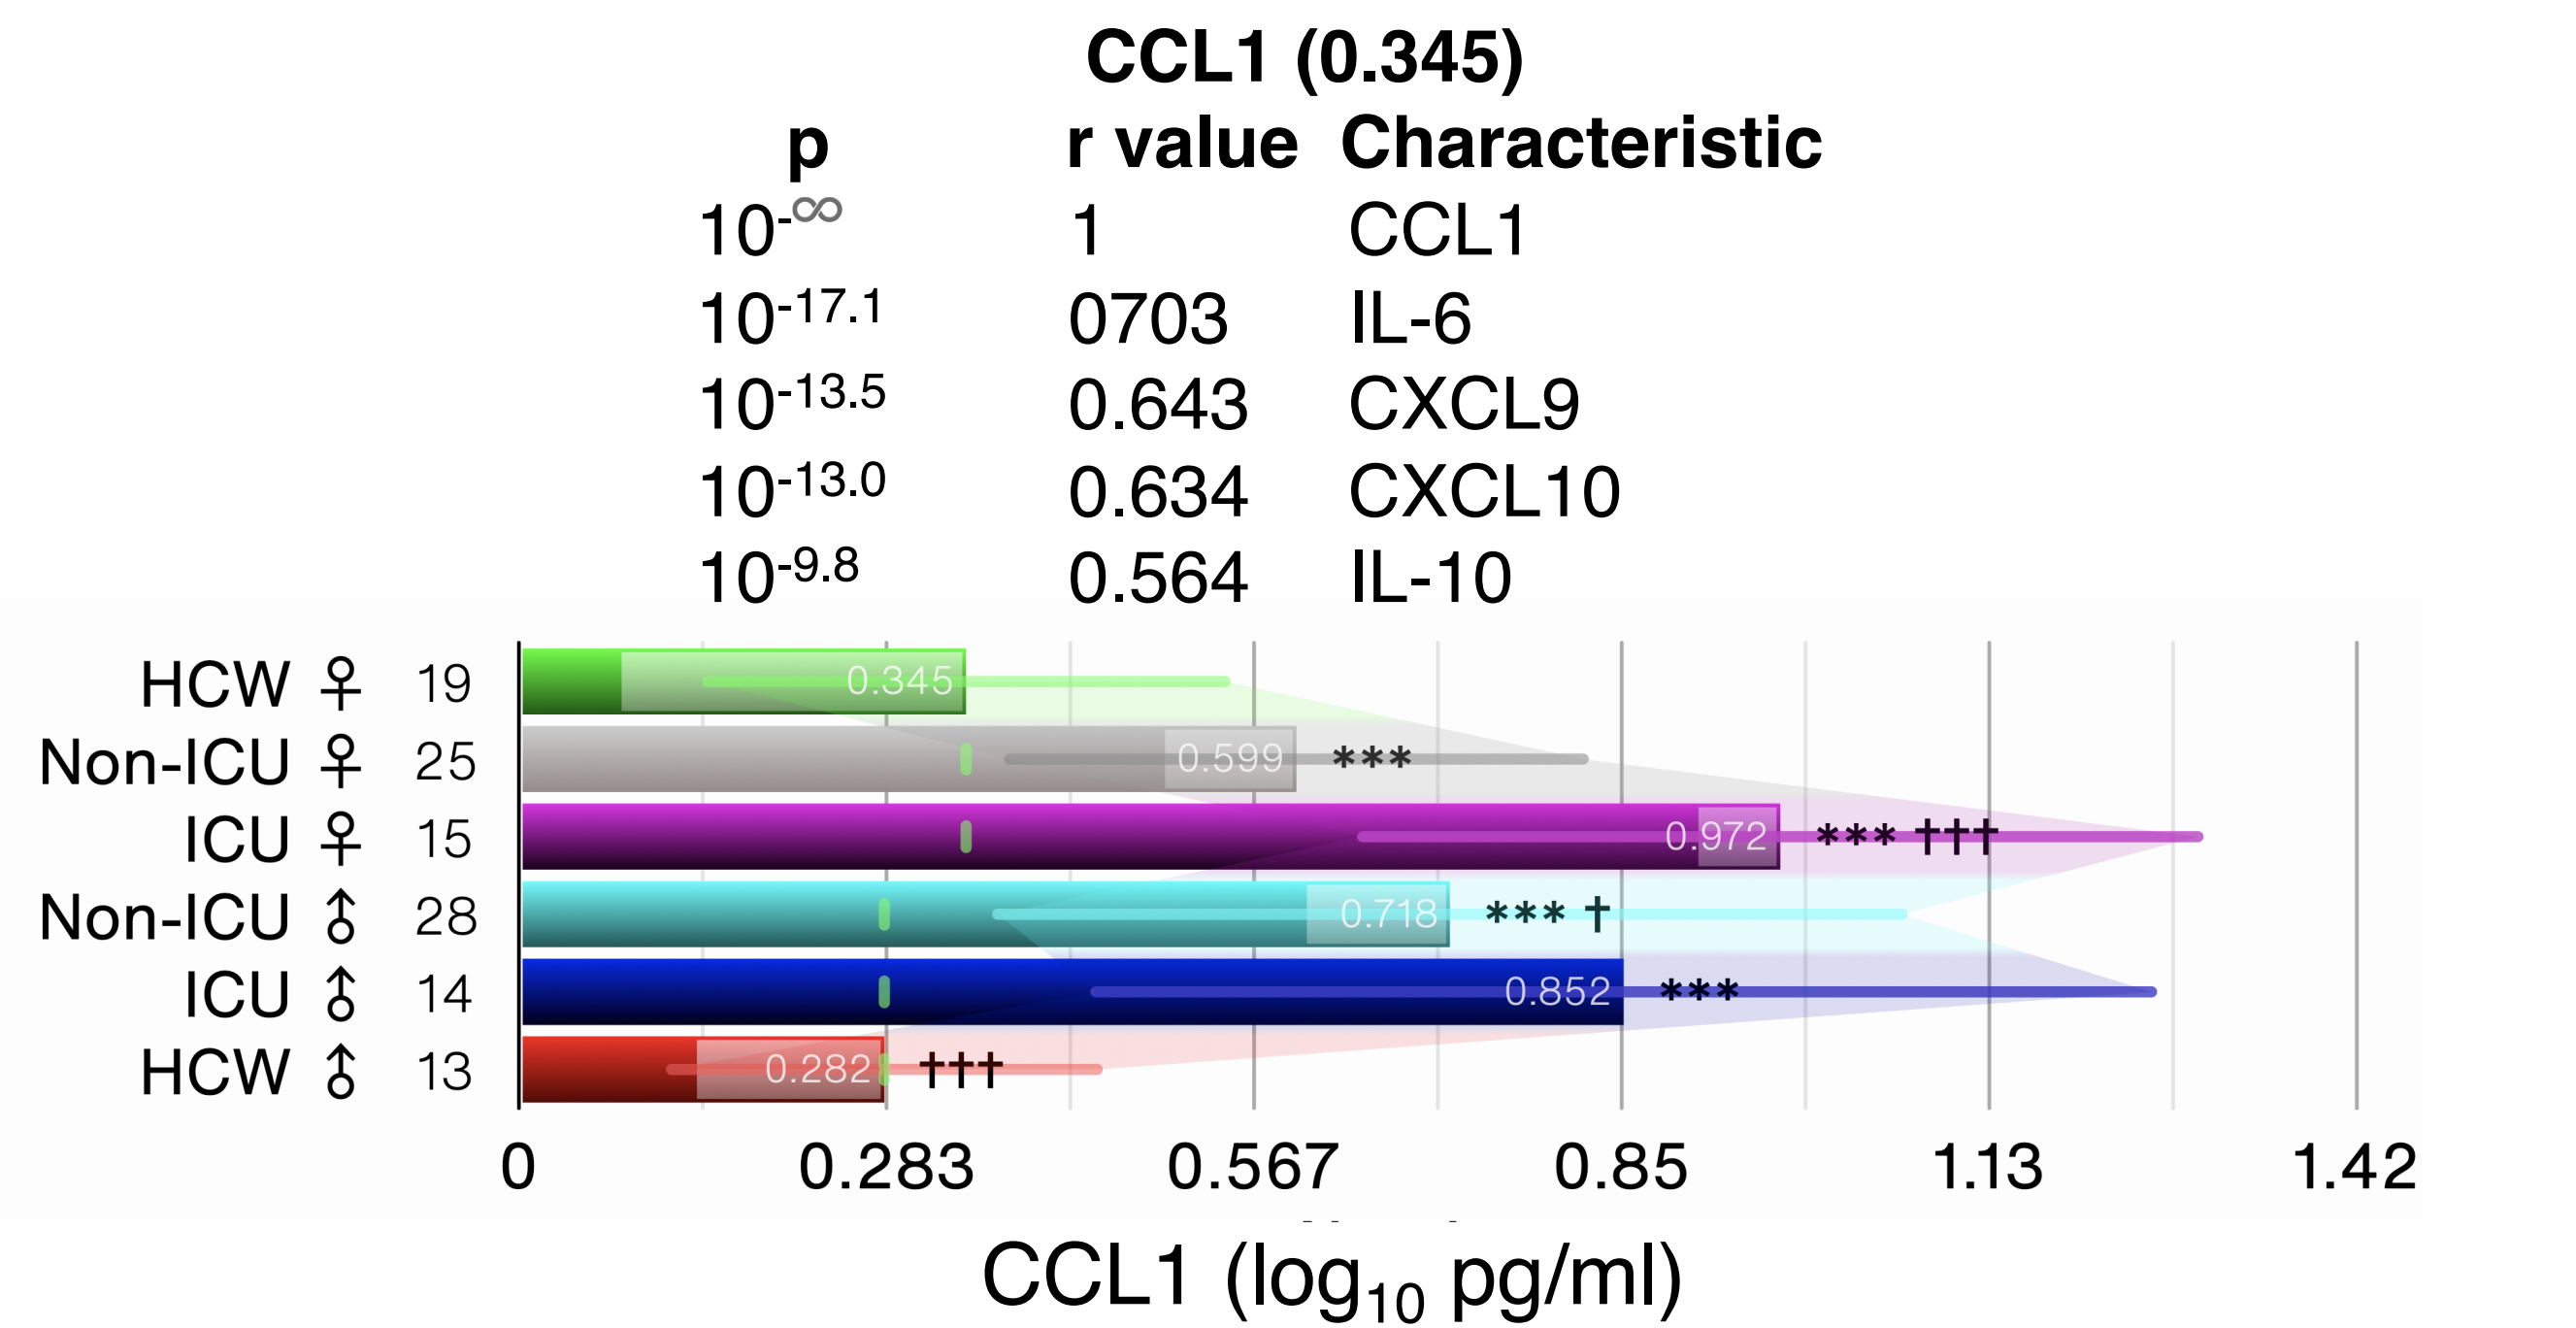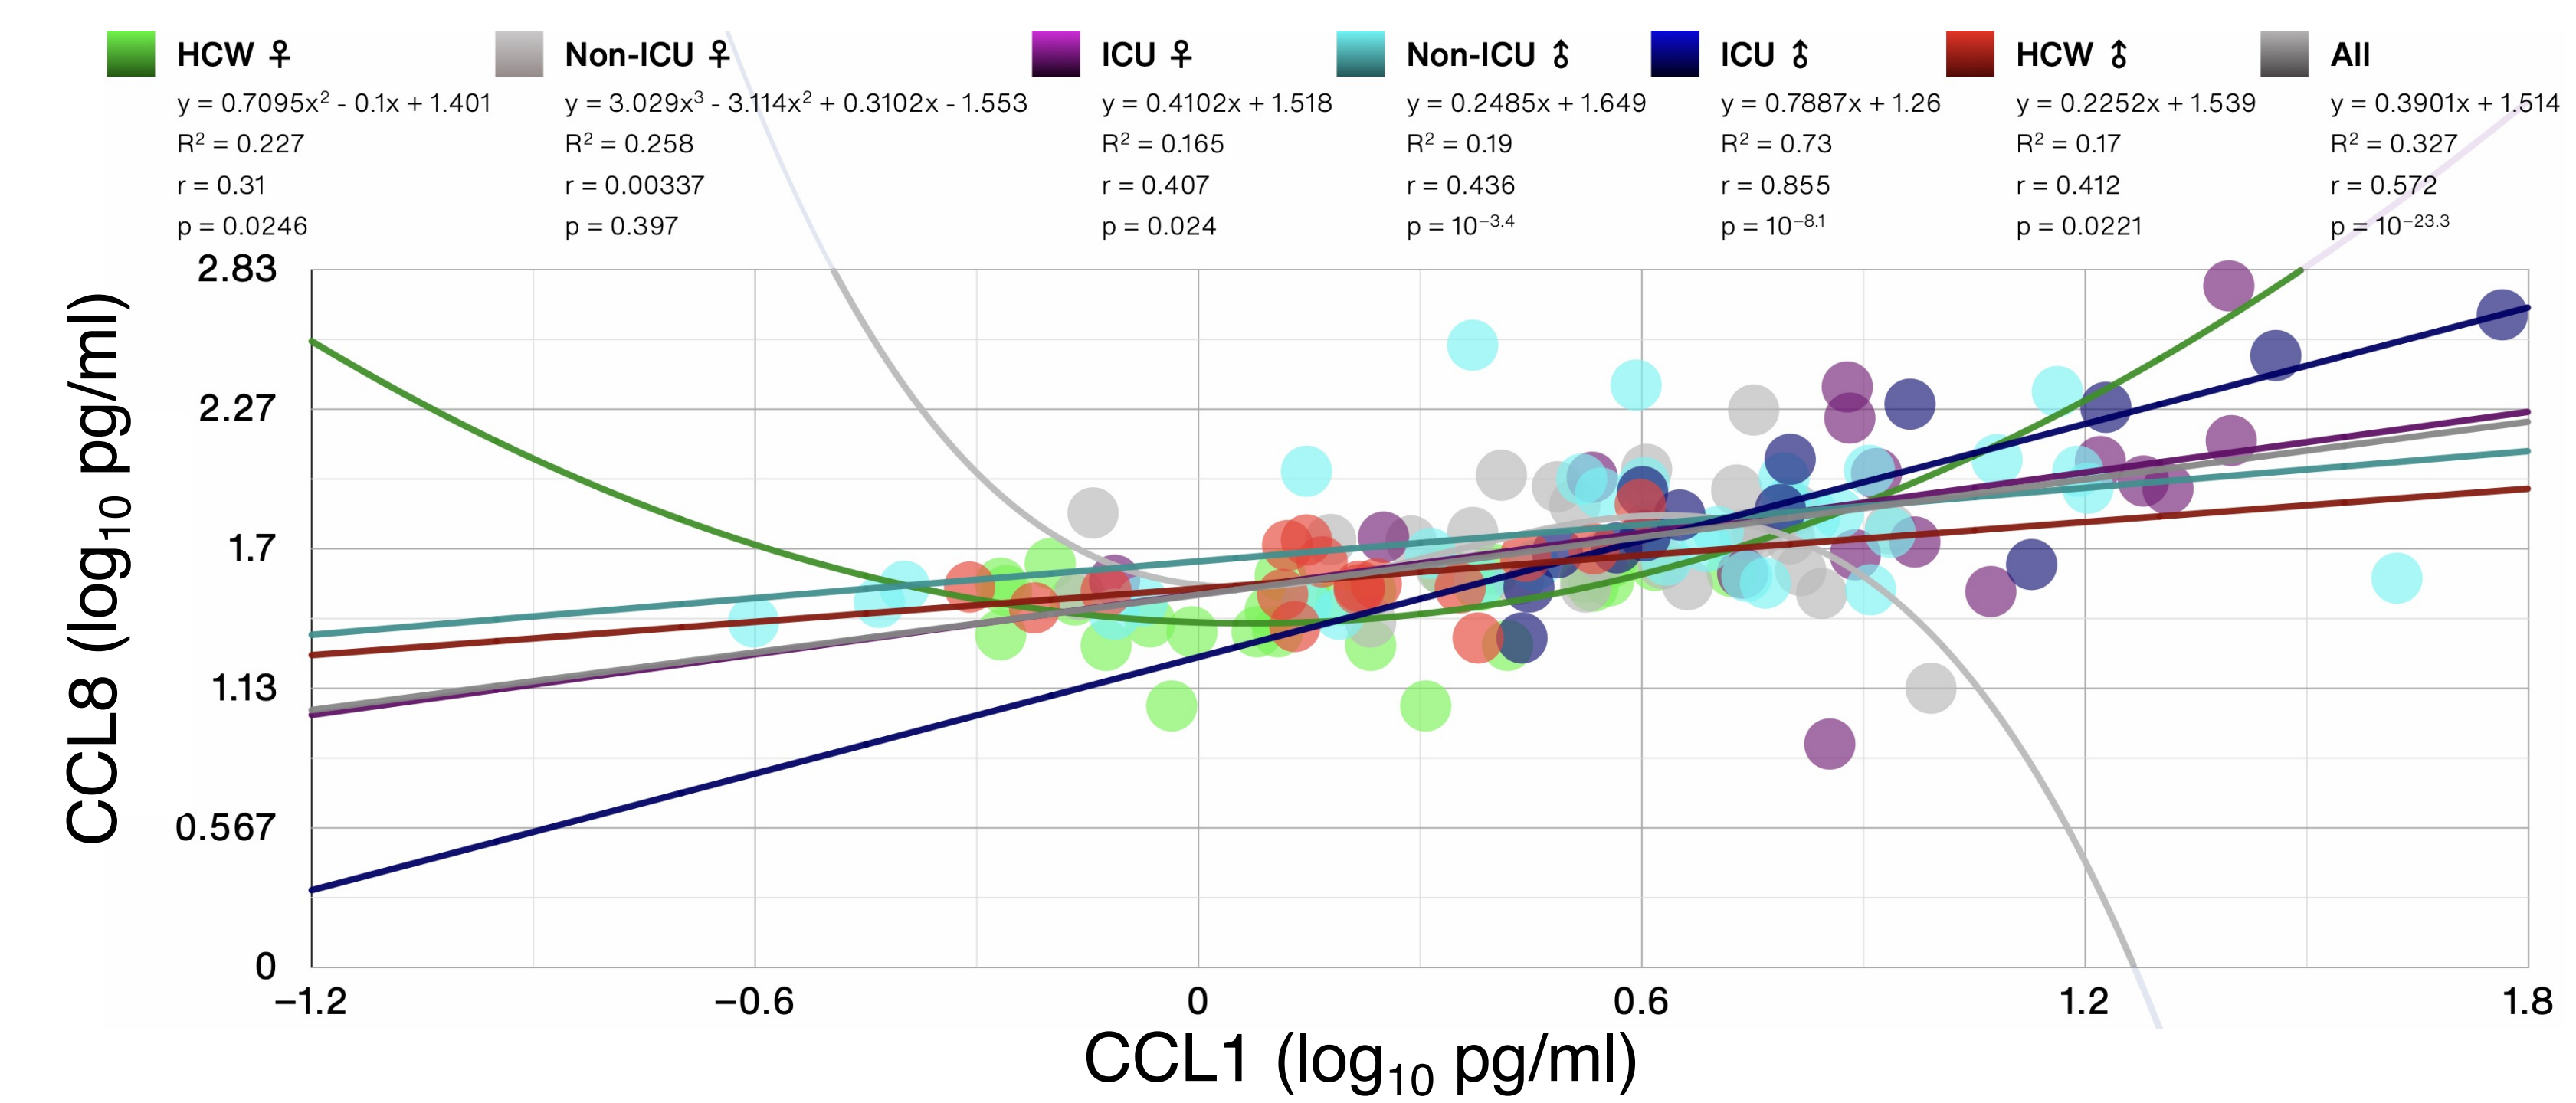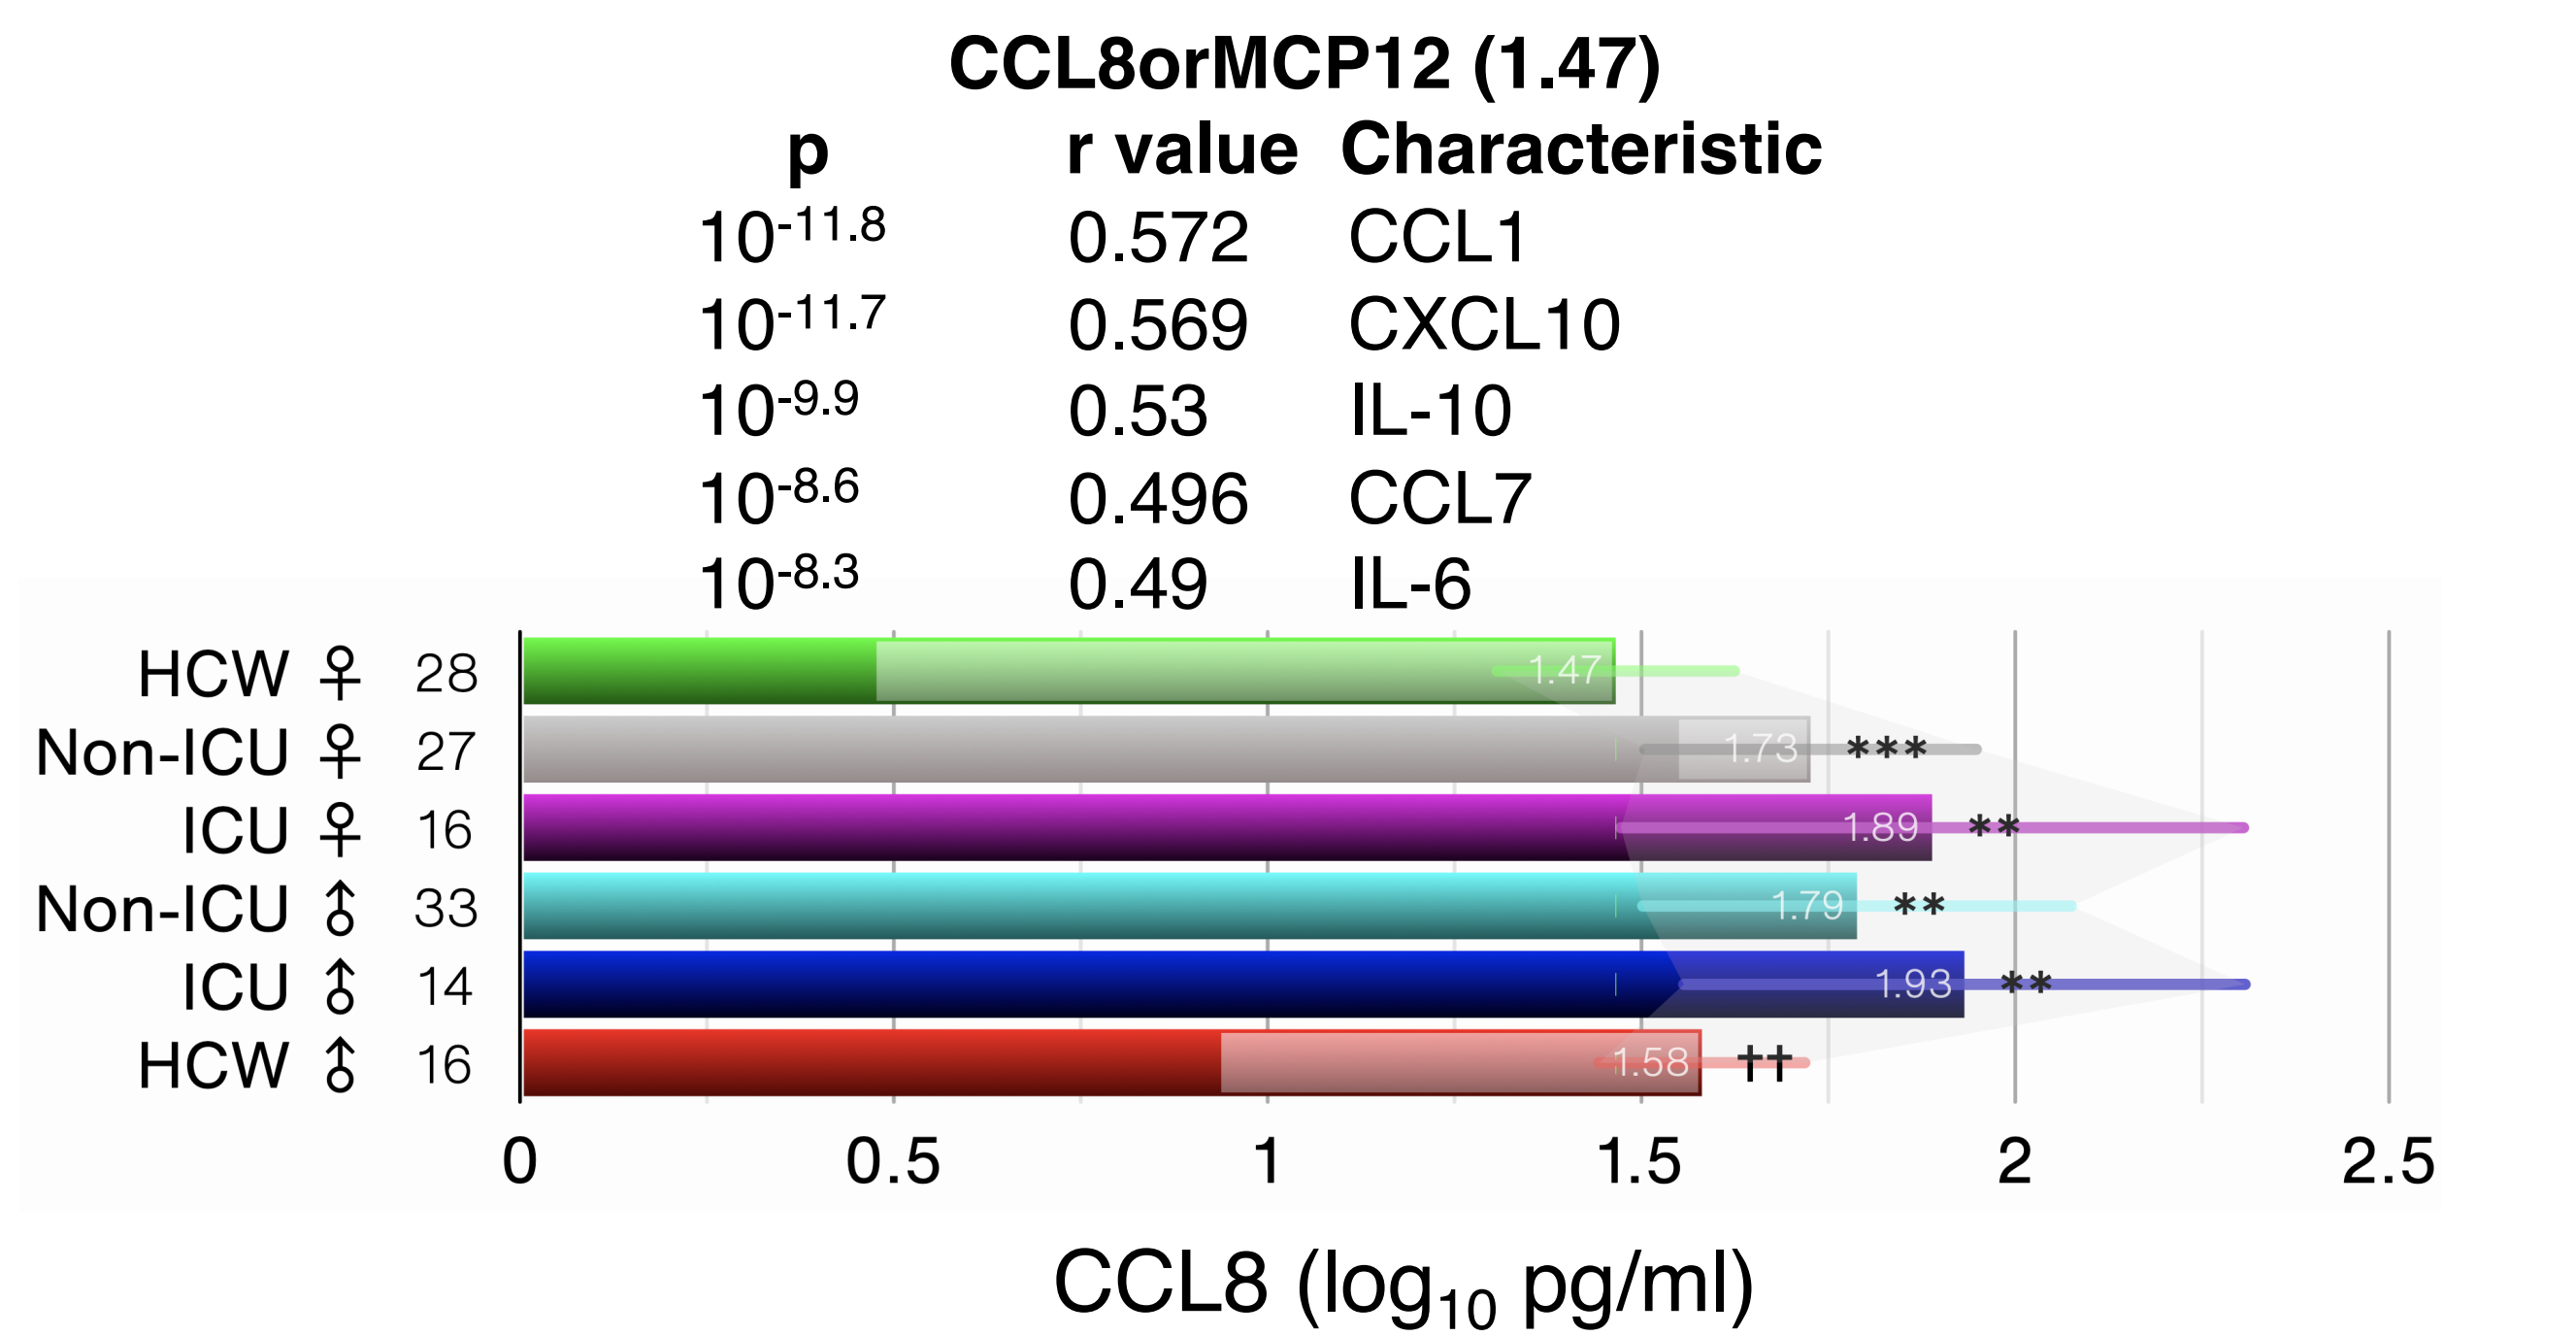



Fig. S3

a.

Vs HCW

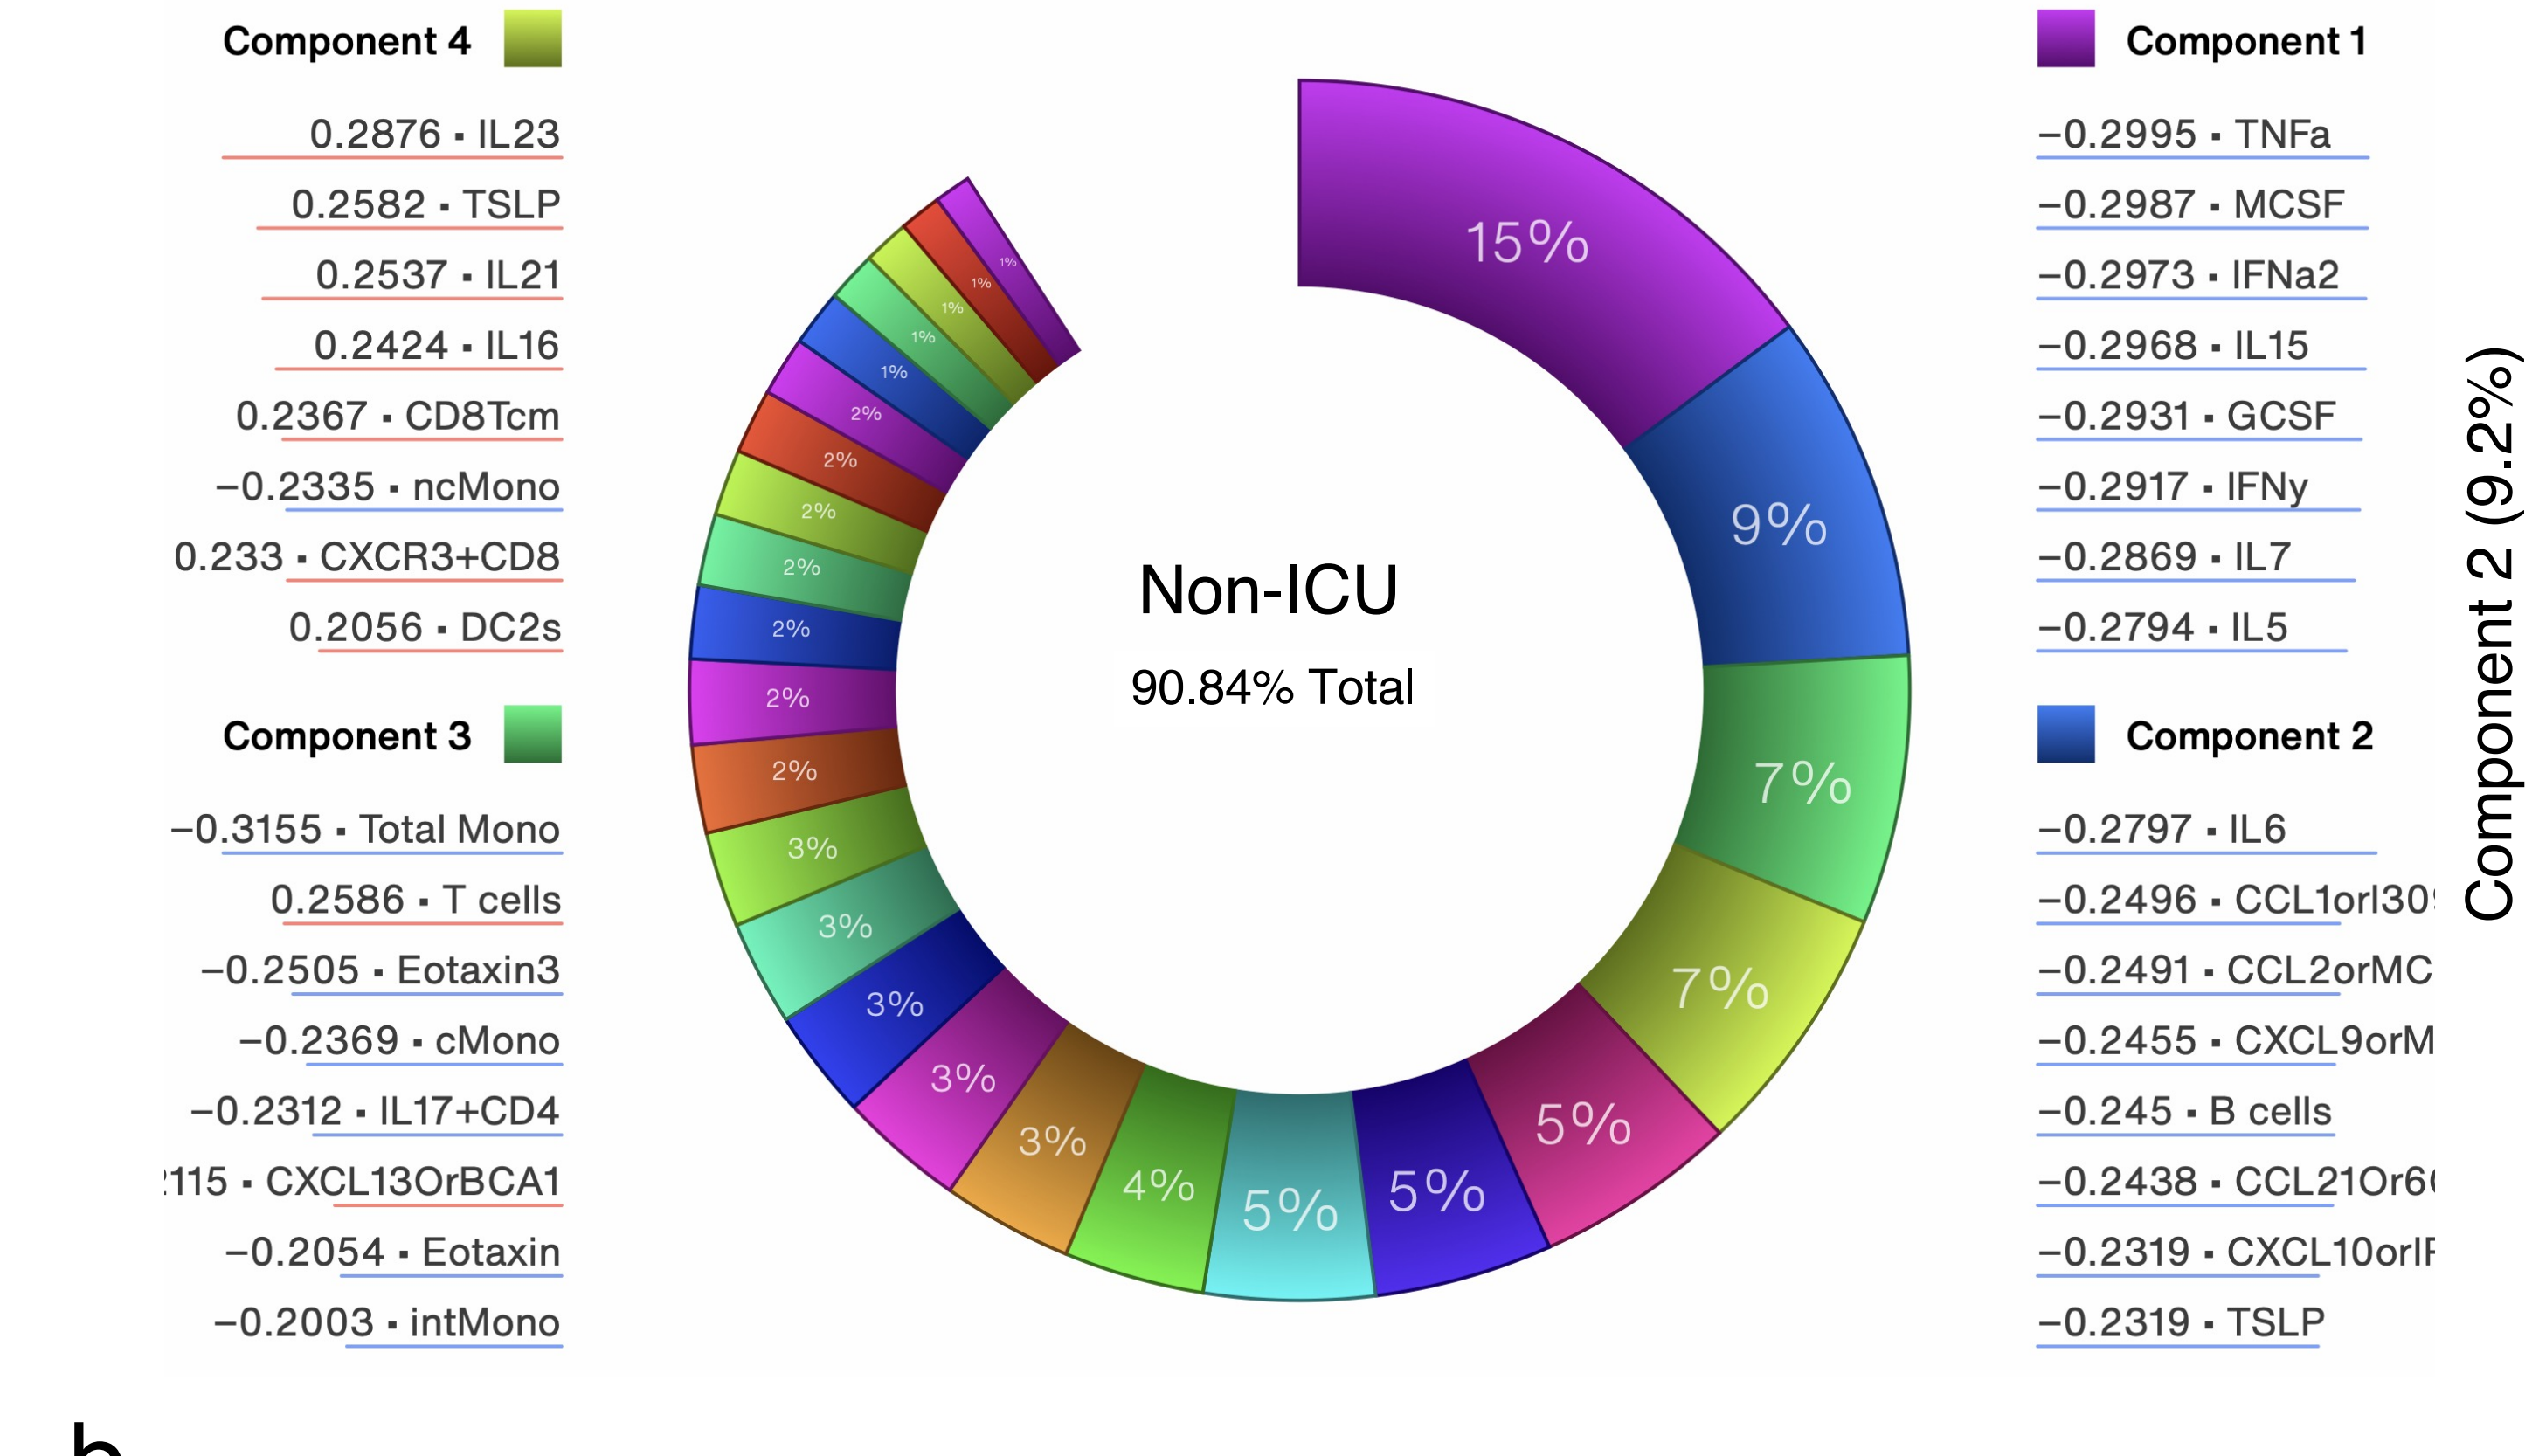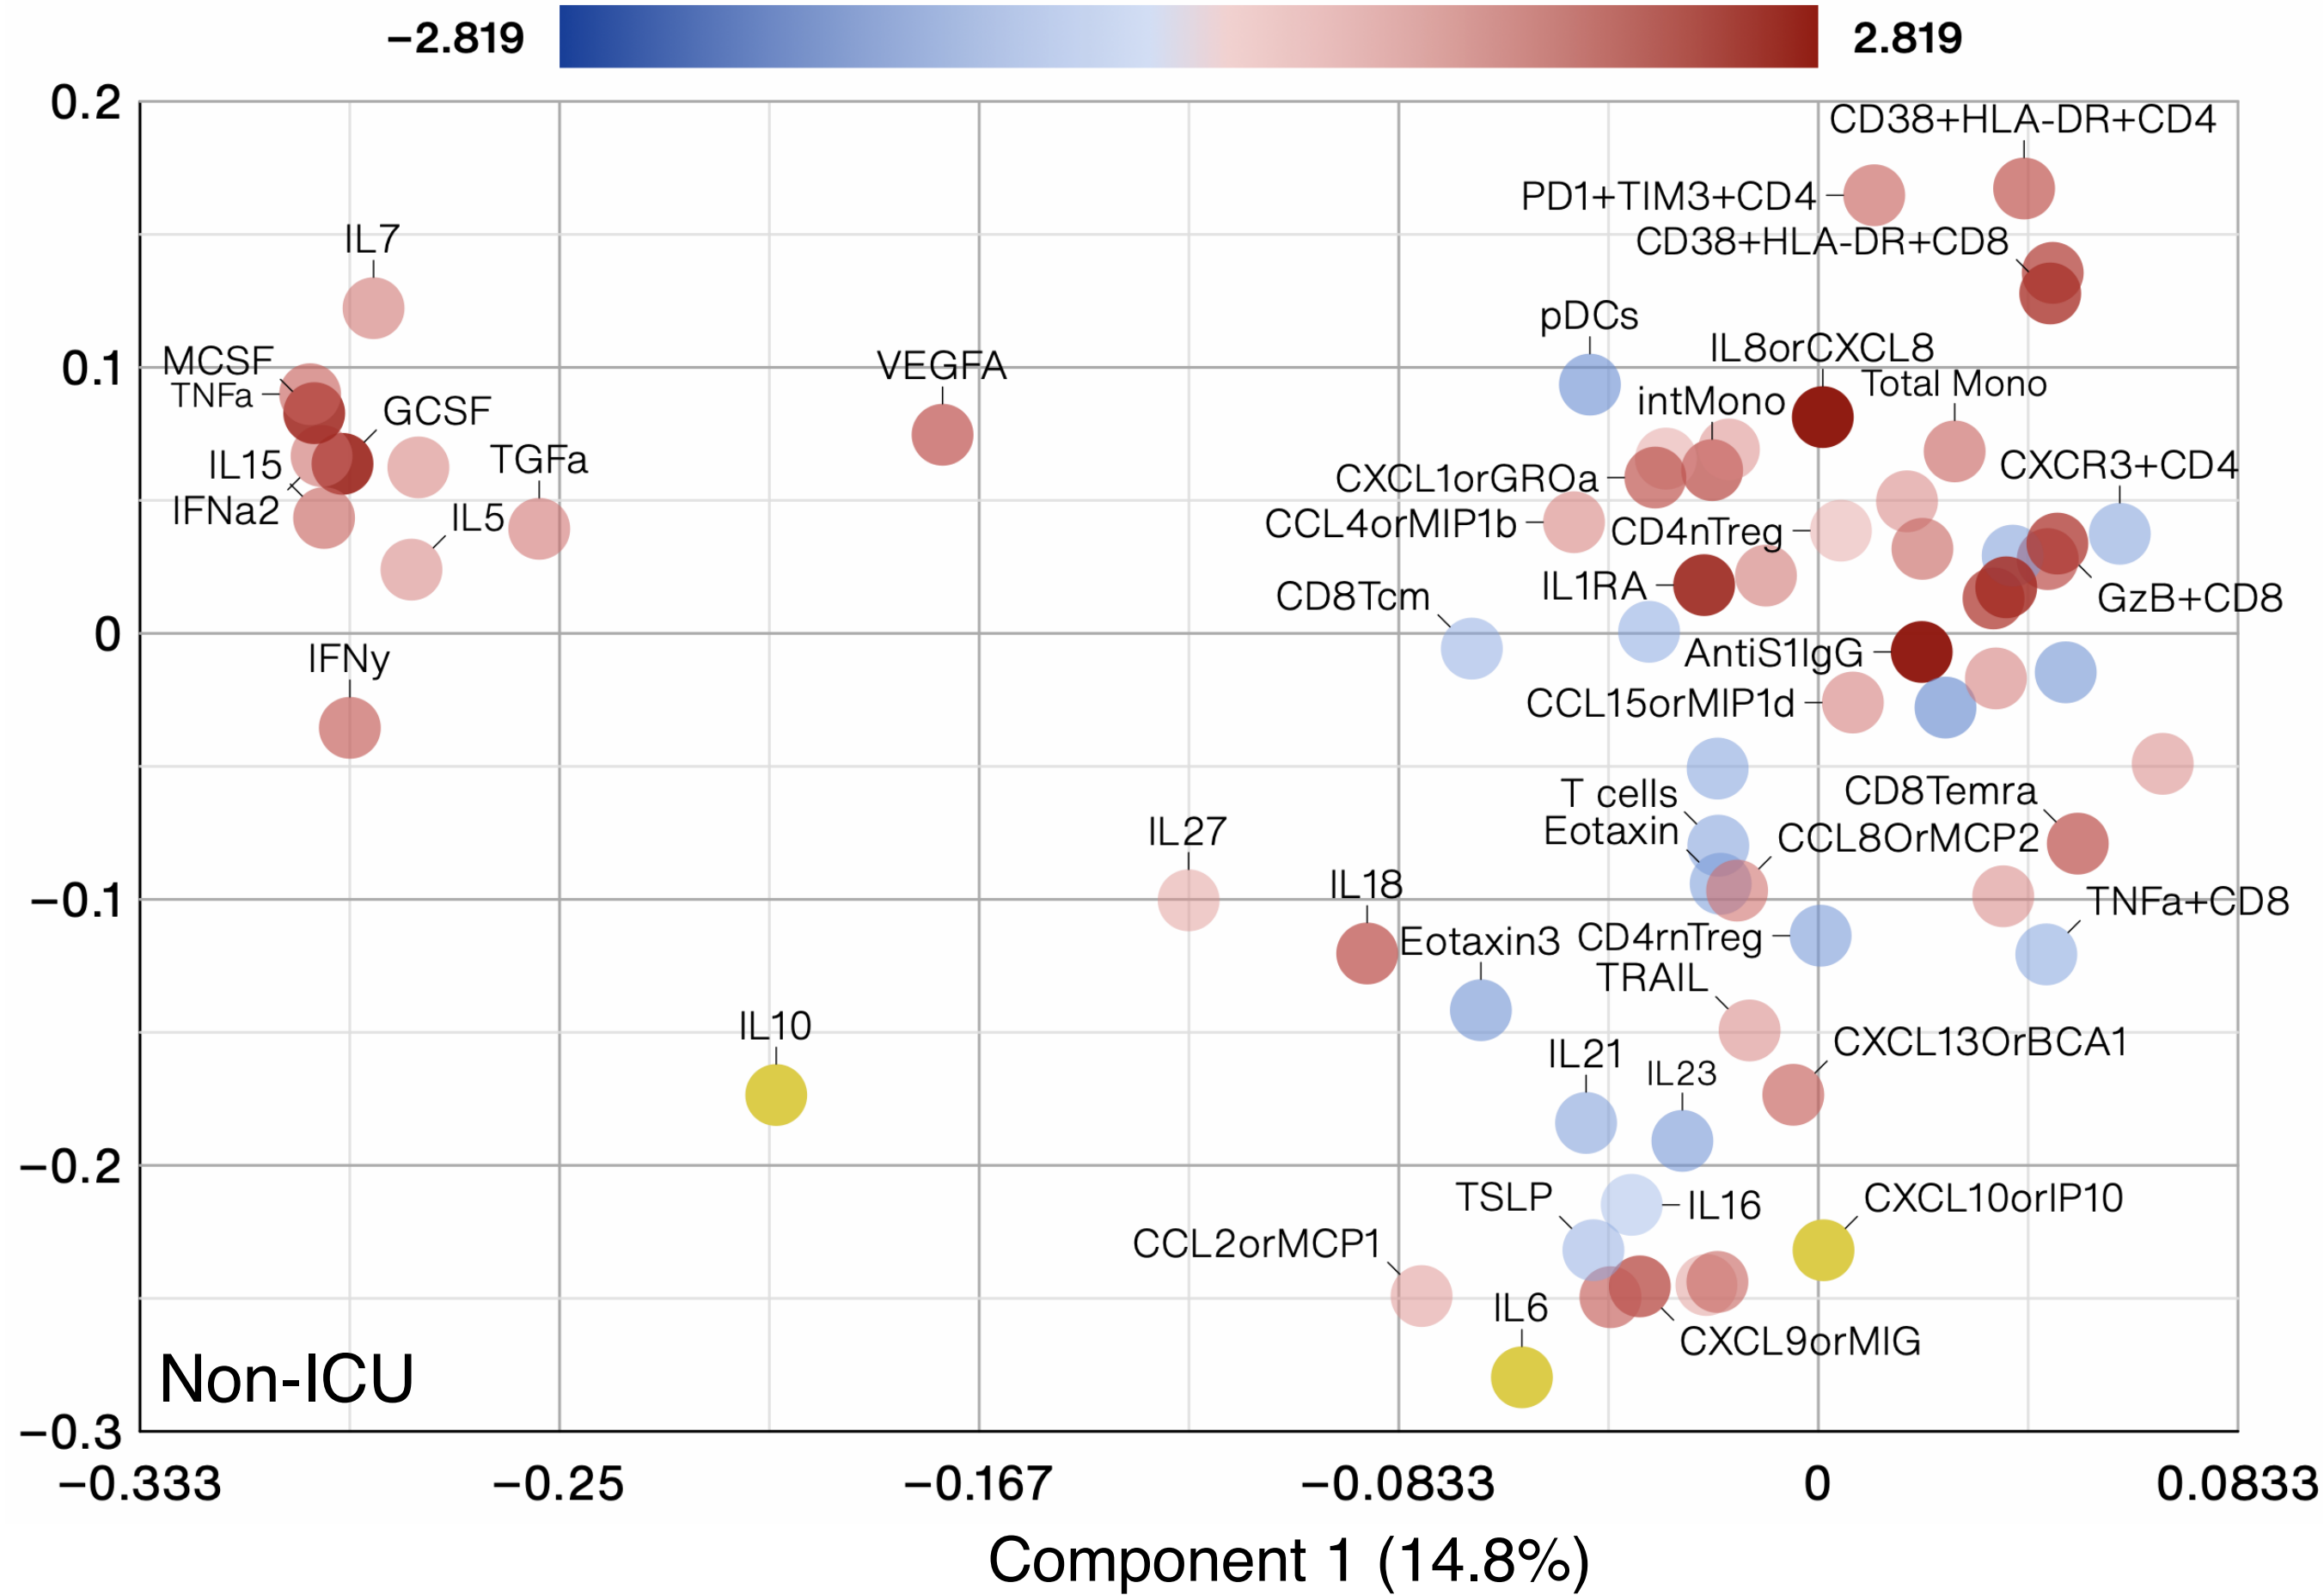

b.

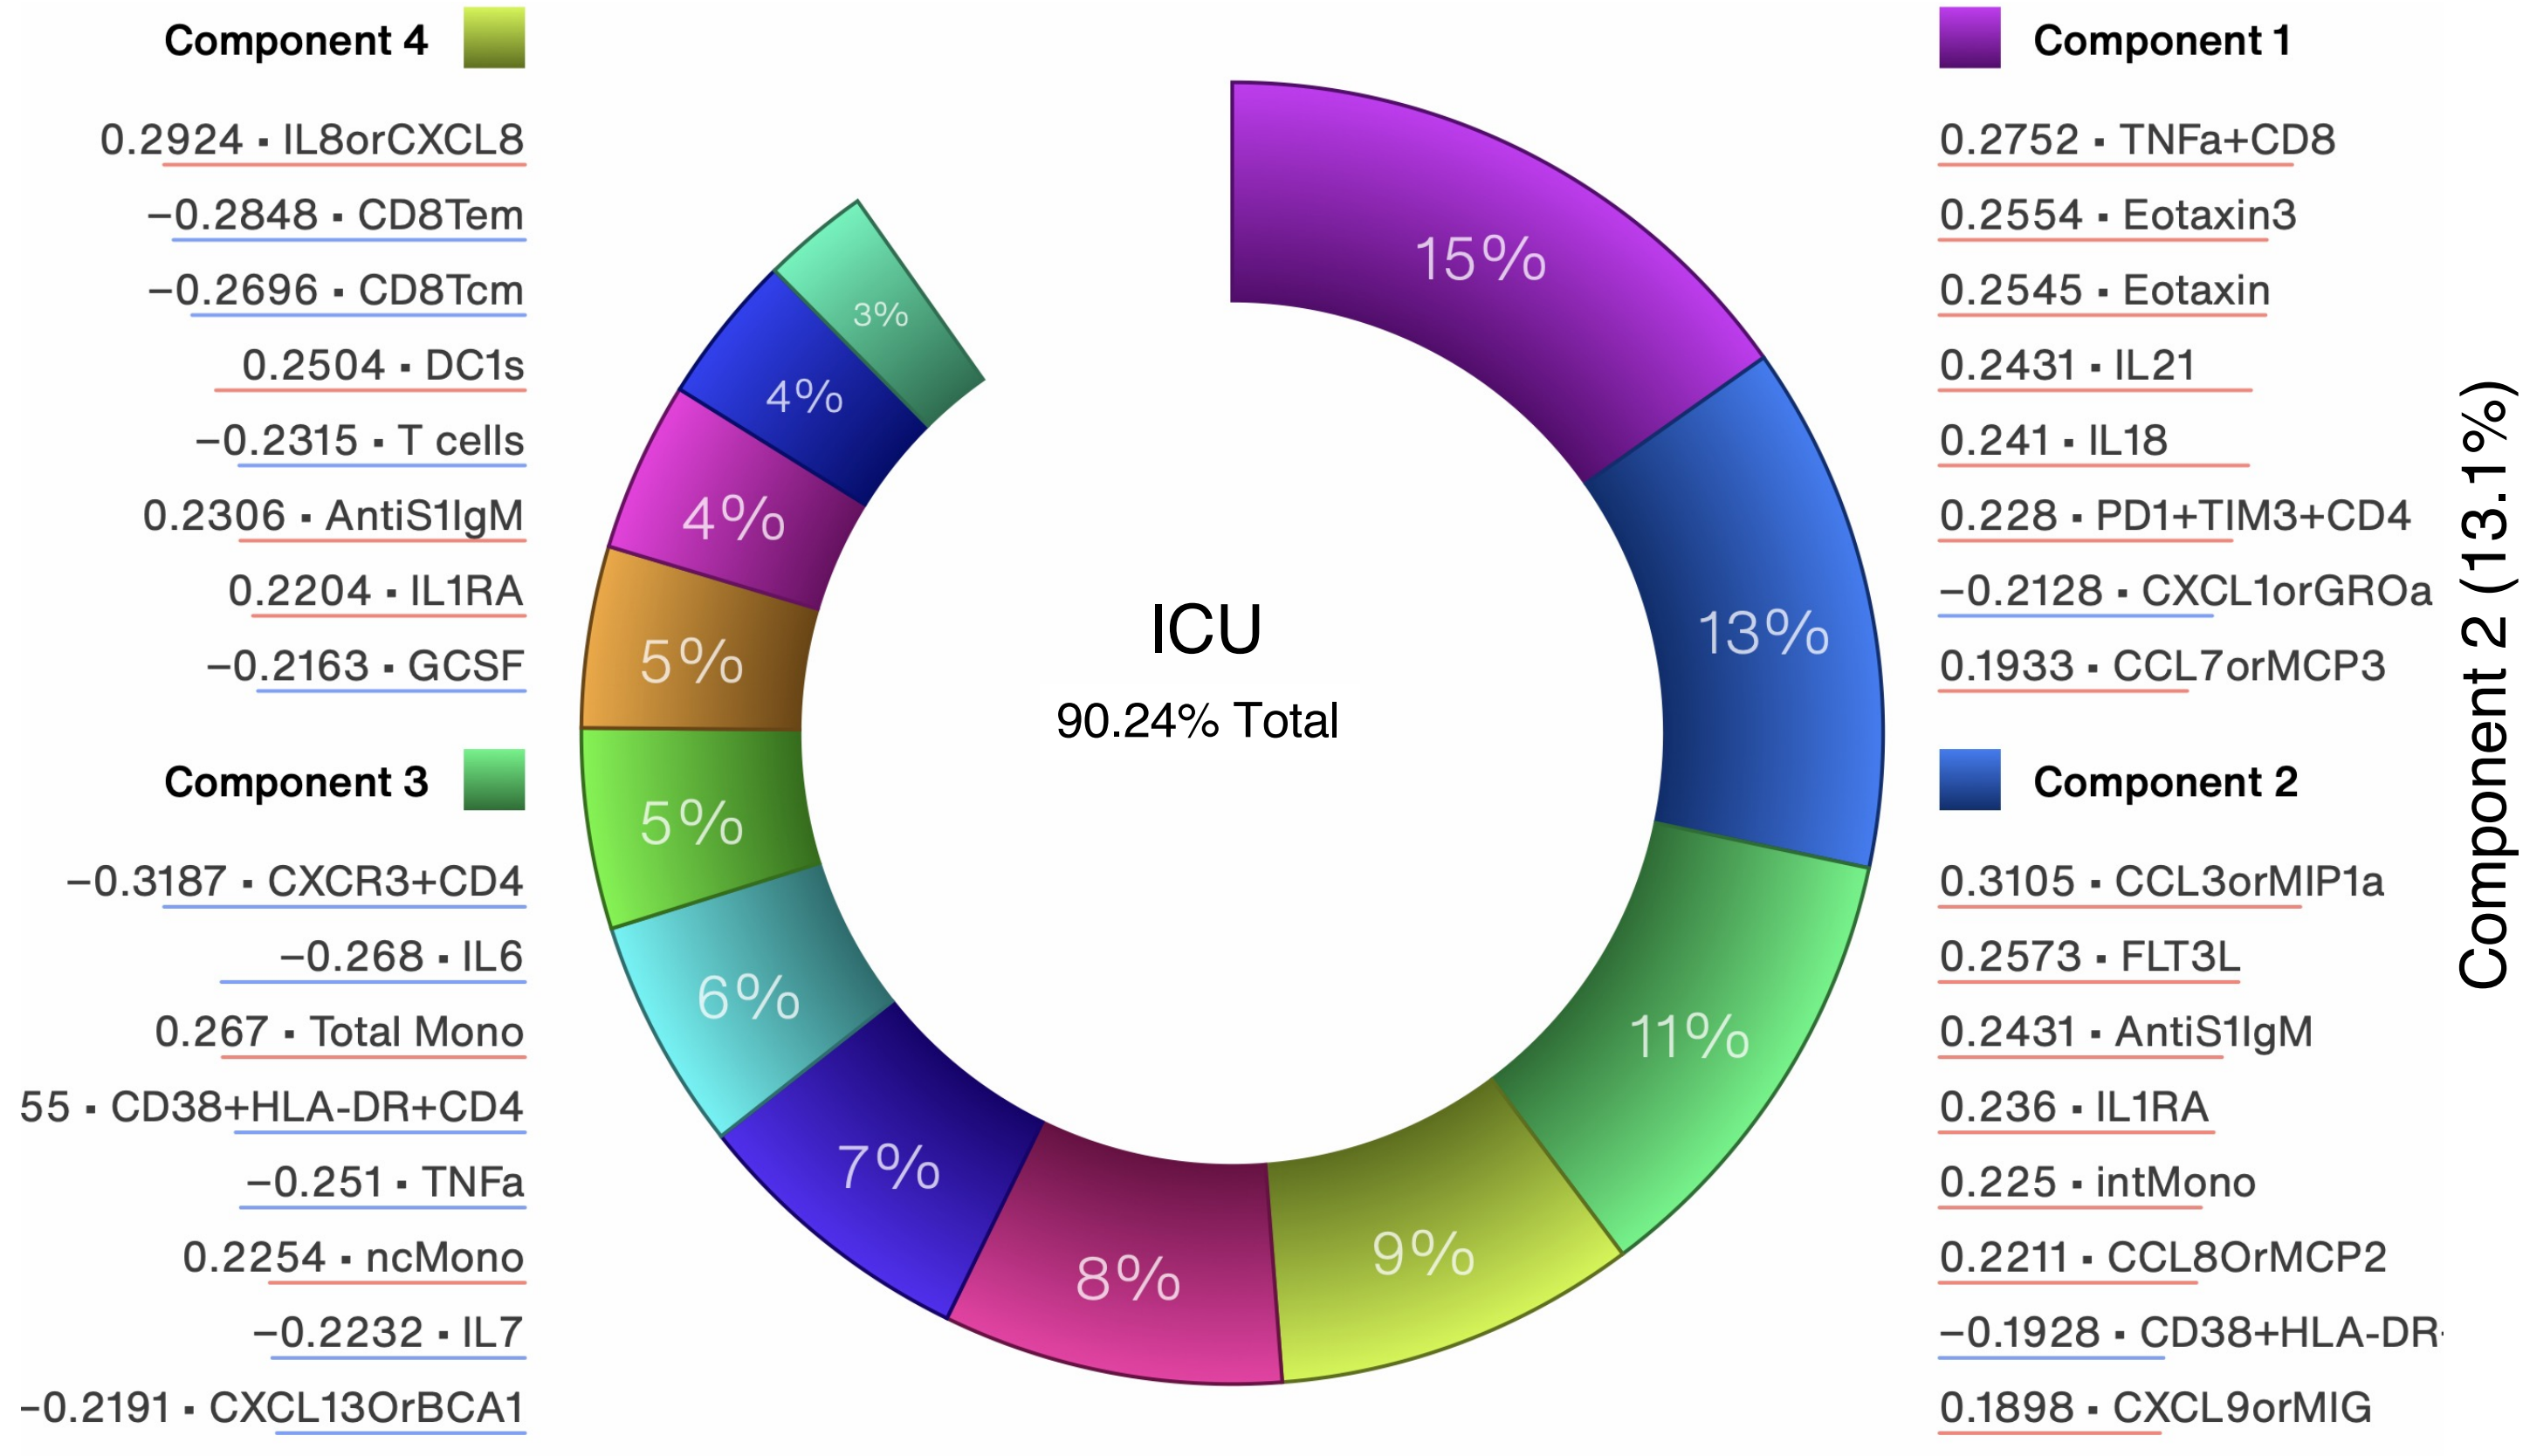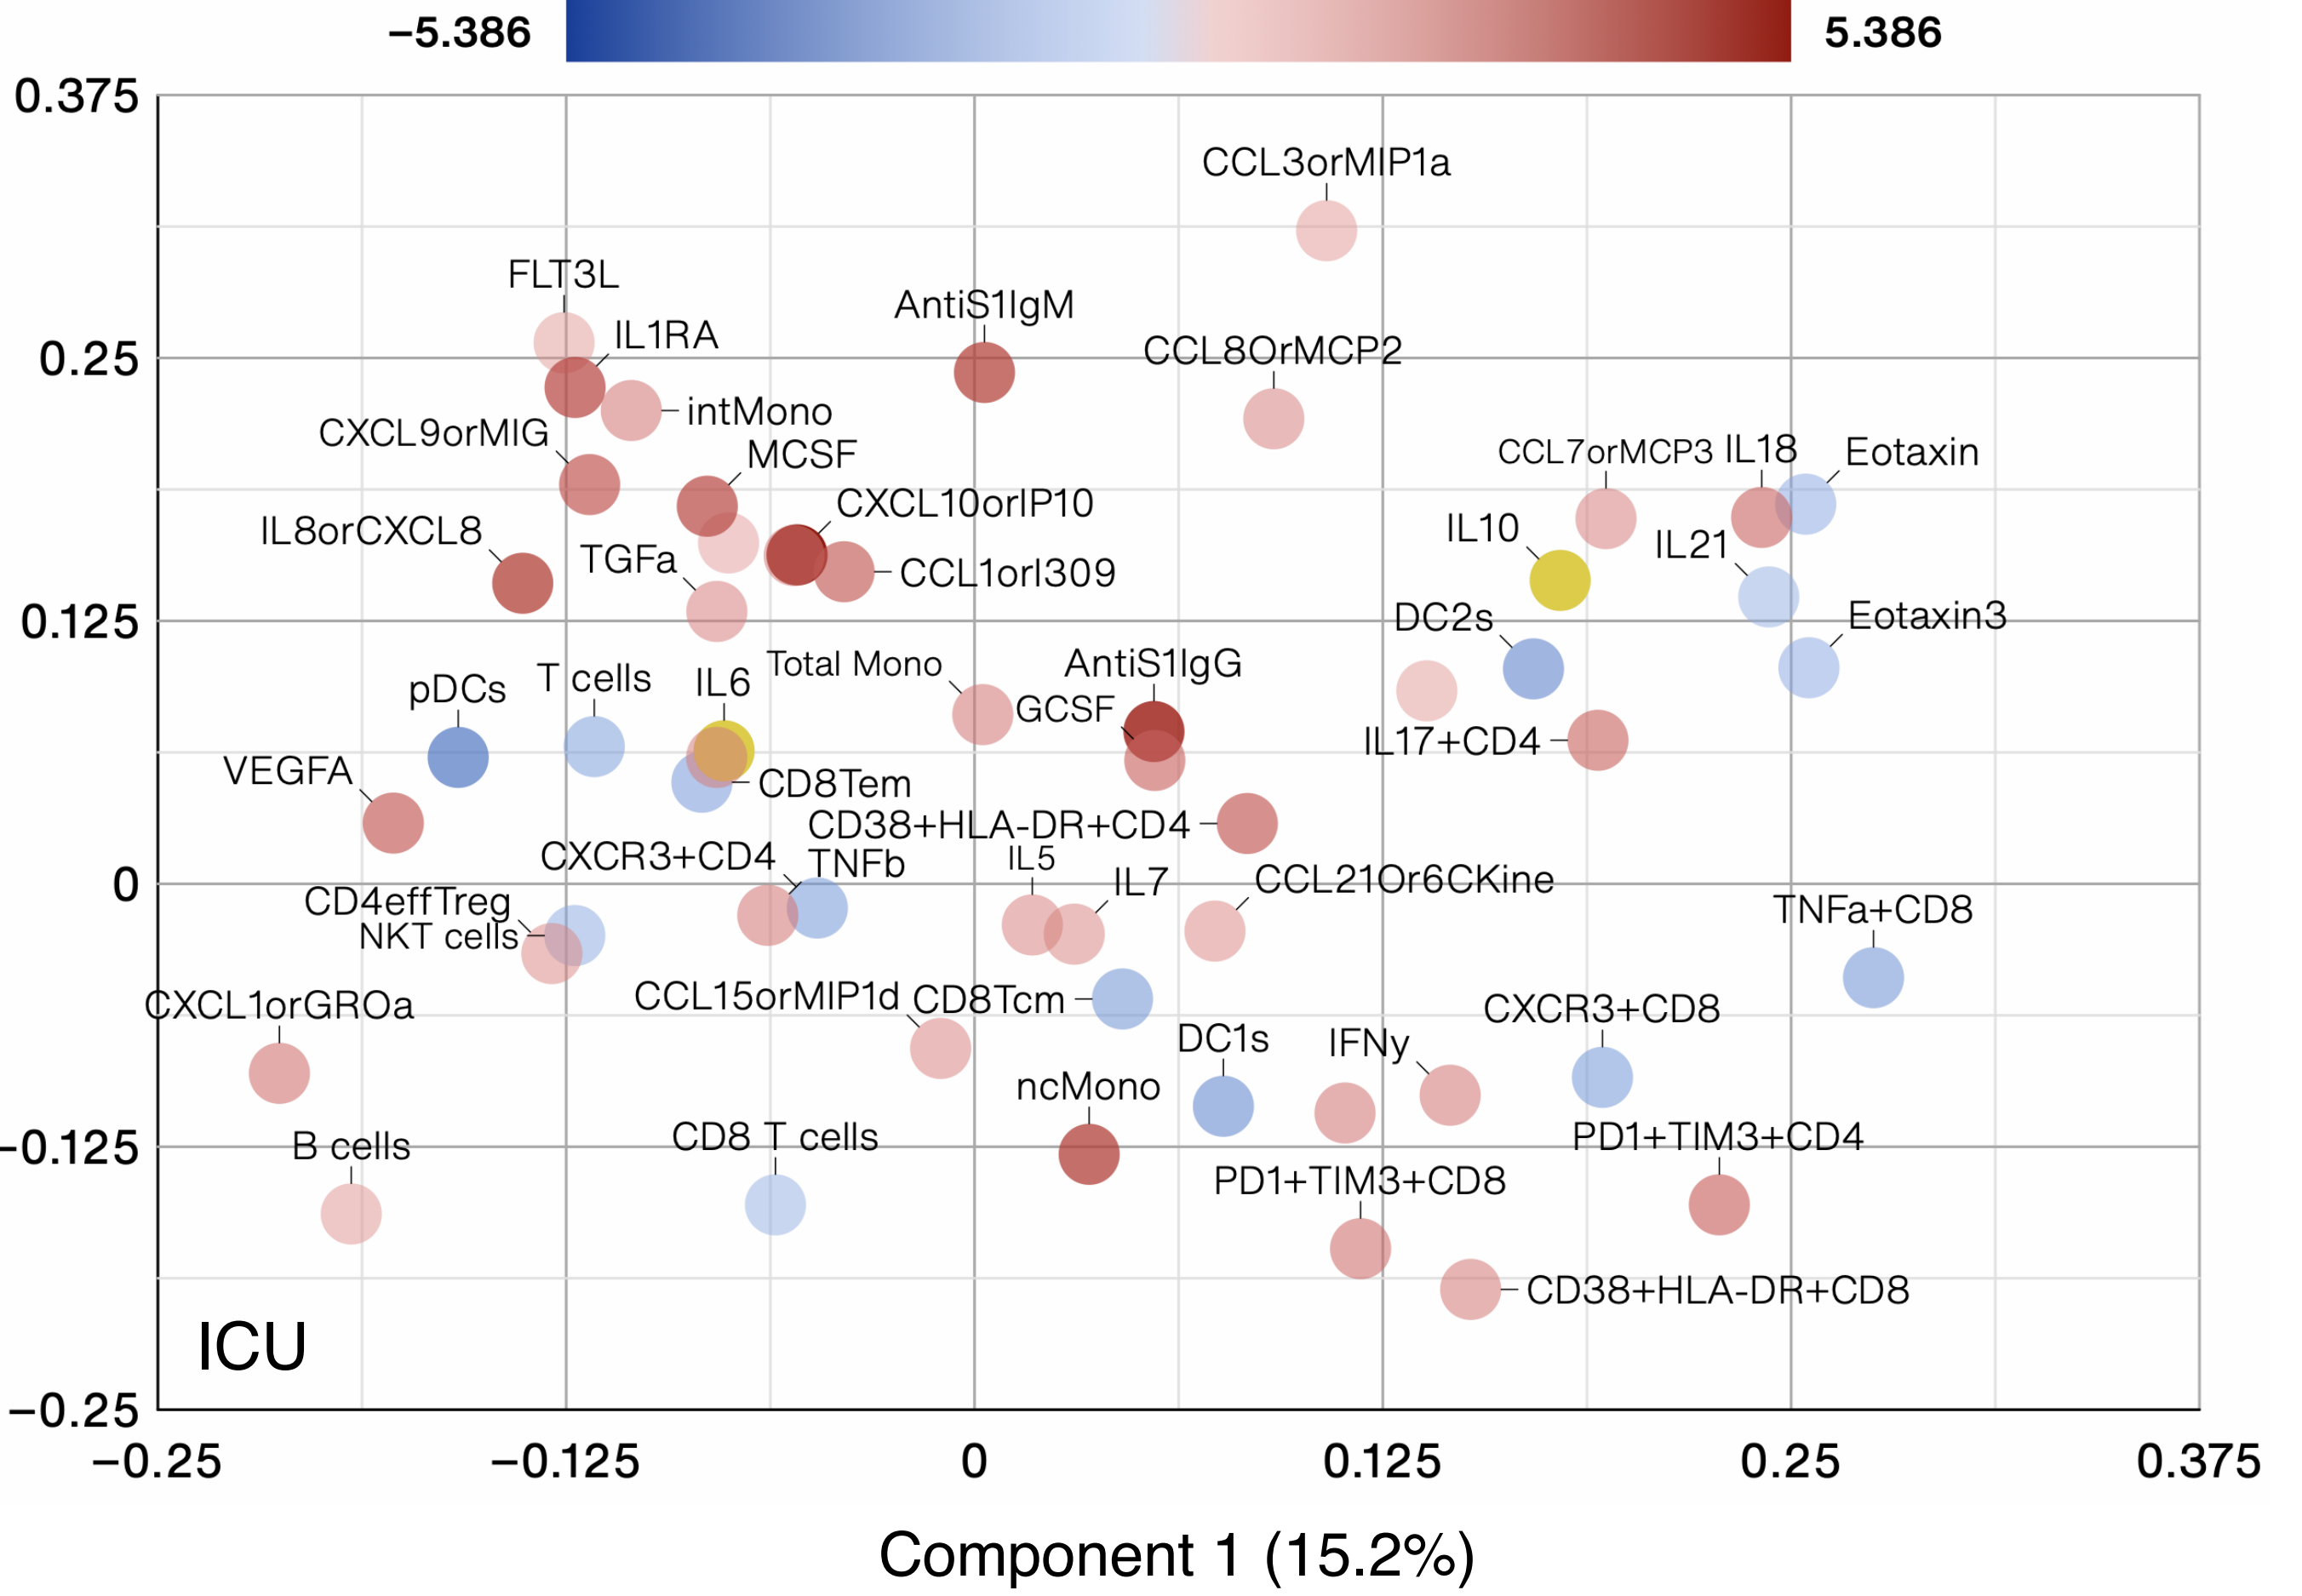

c.

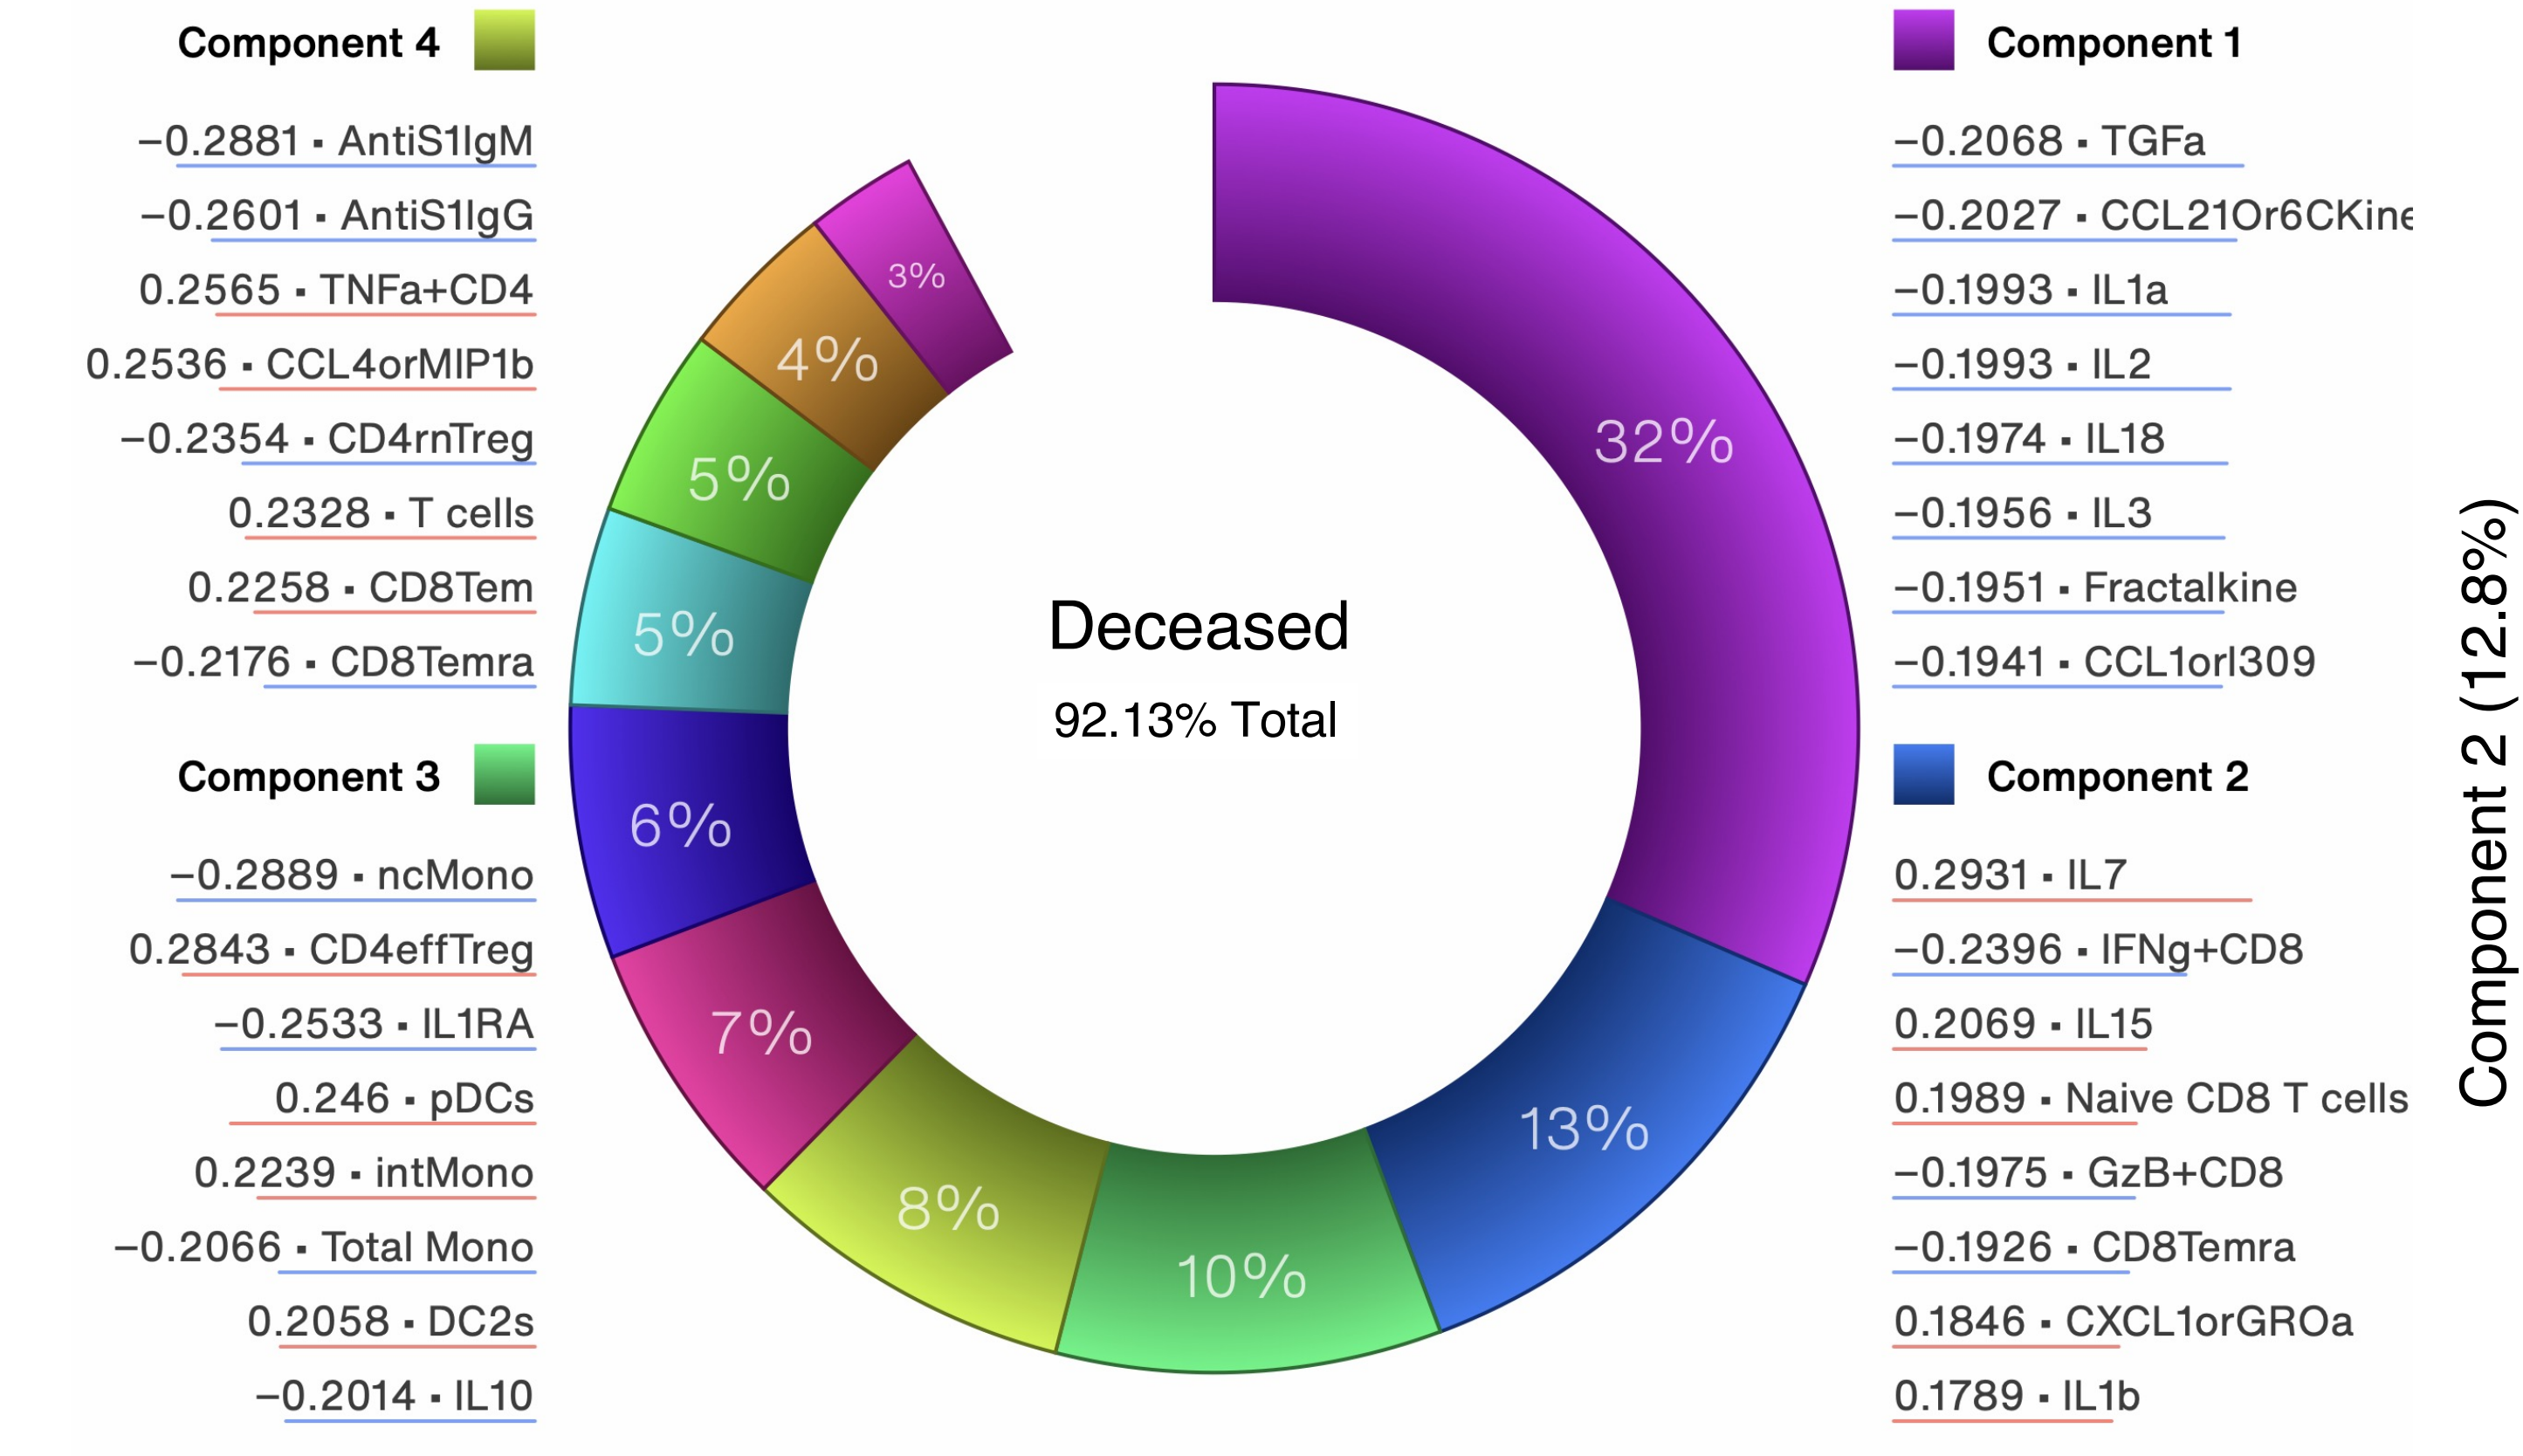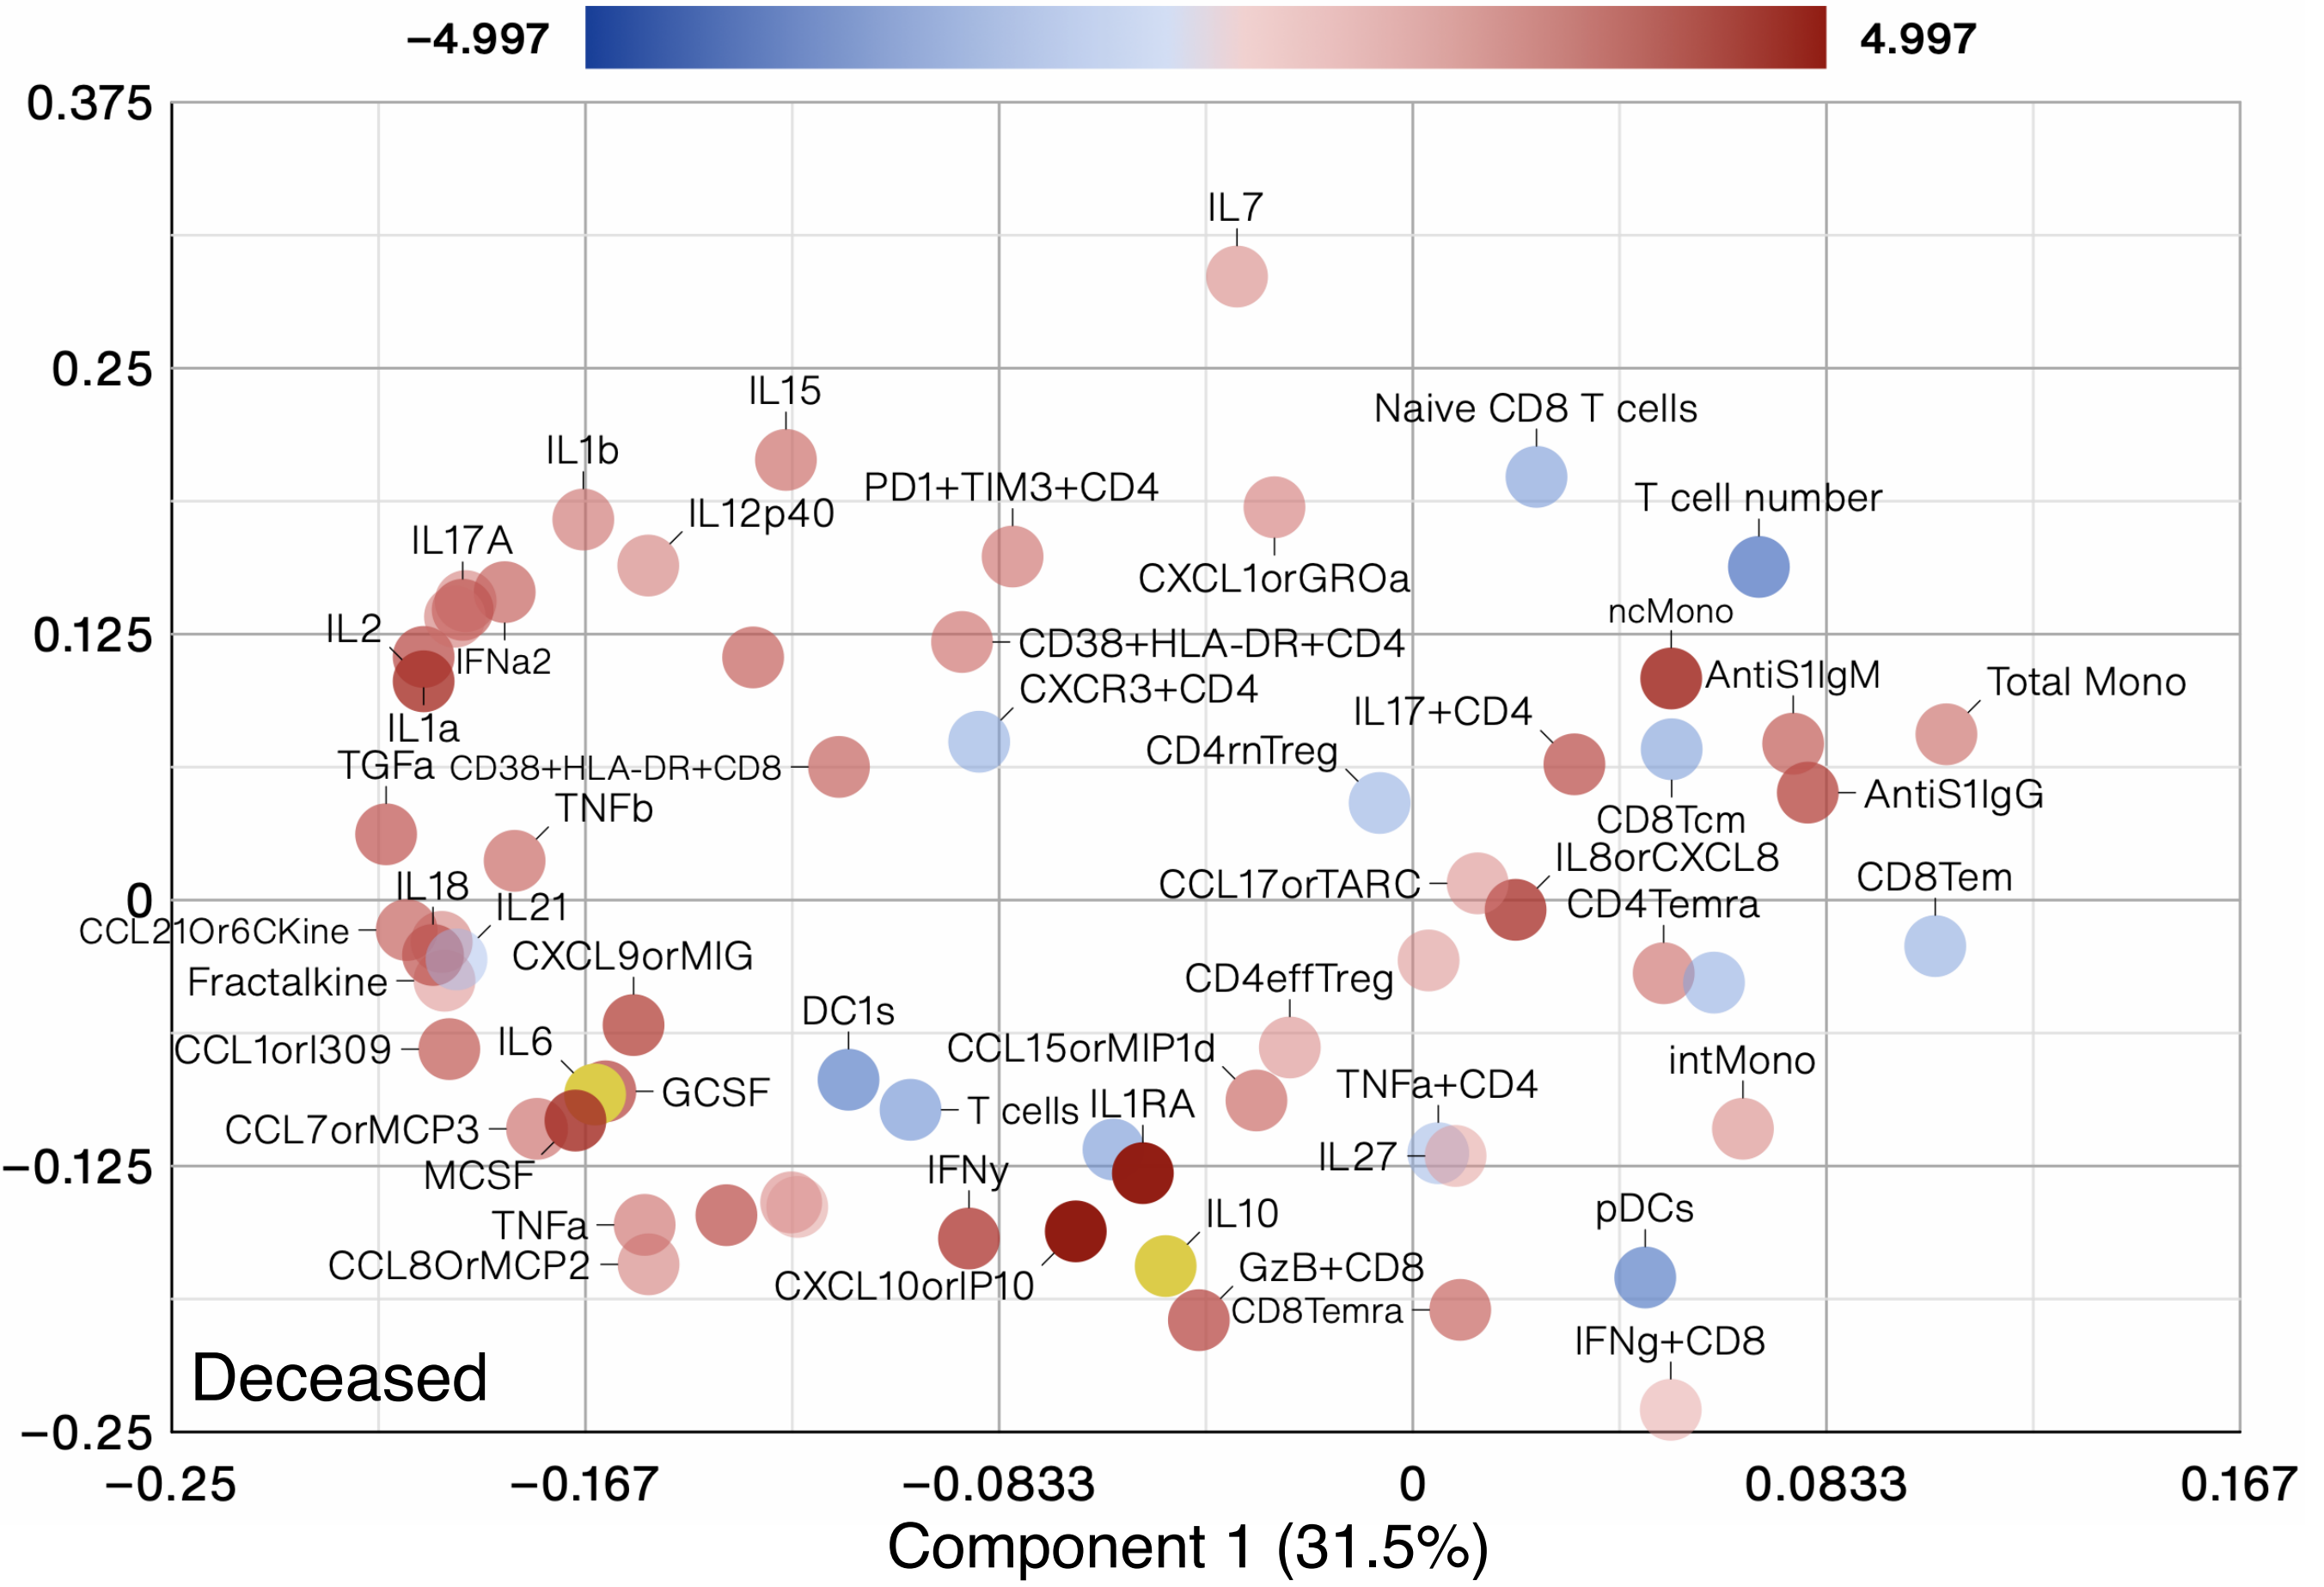



Fig. S3

d.

ICU vs Non-ICU

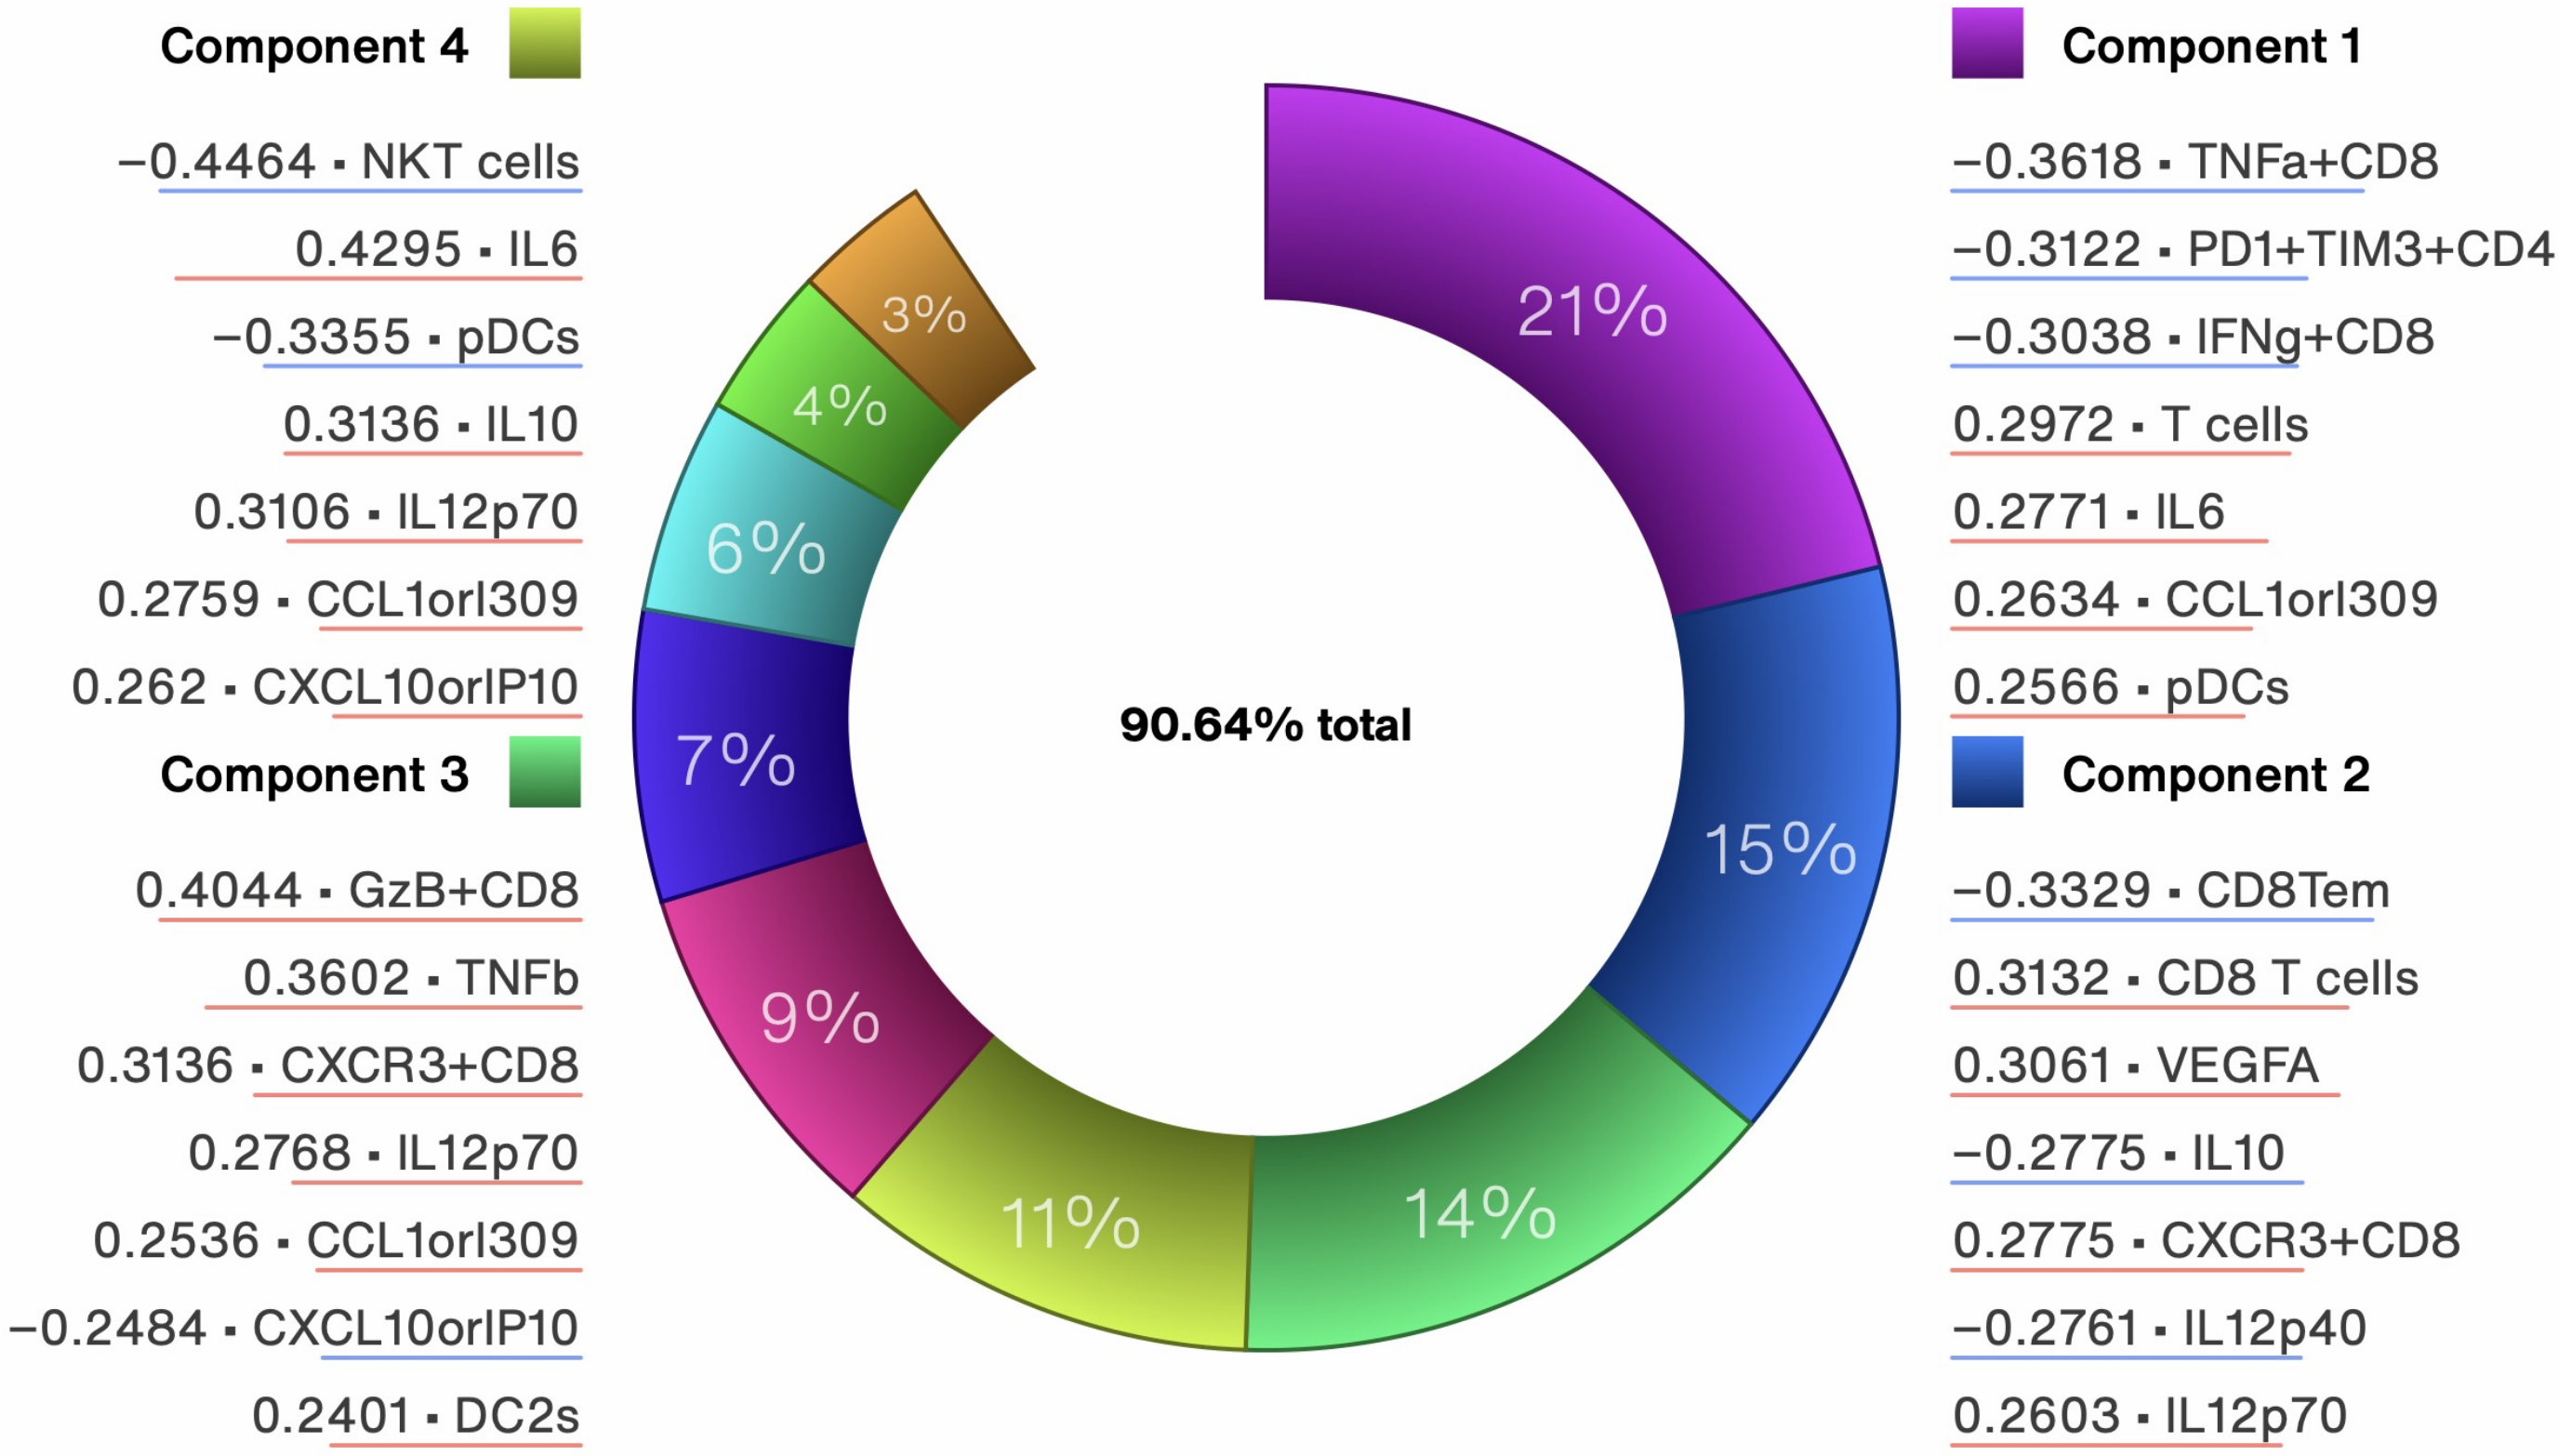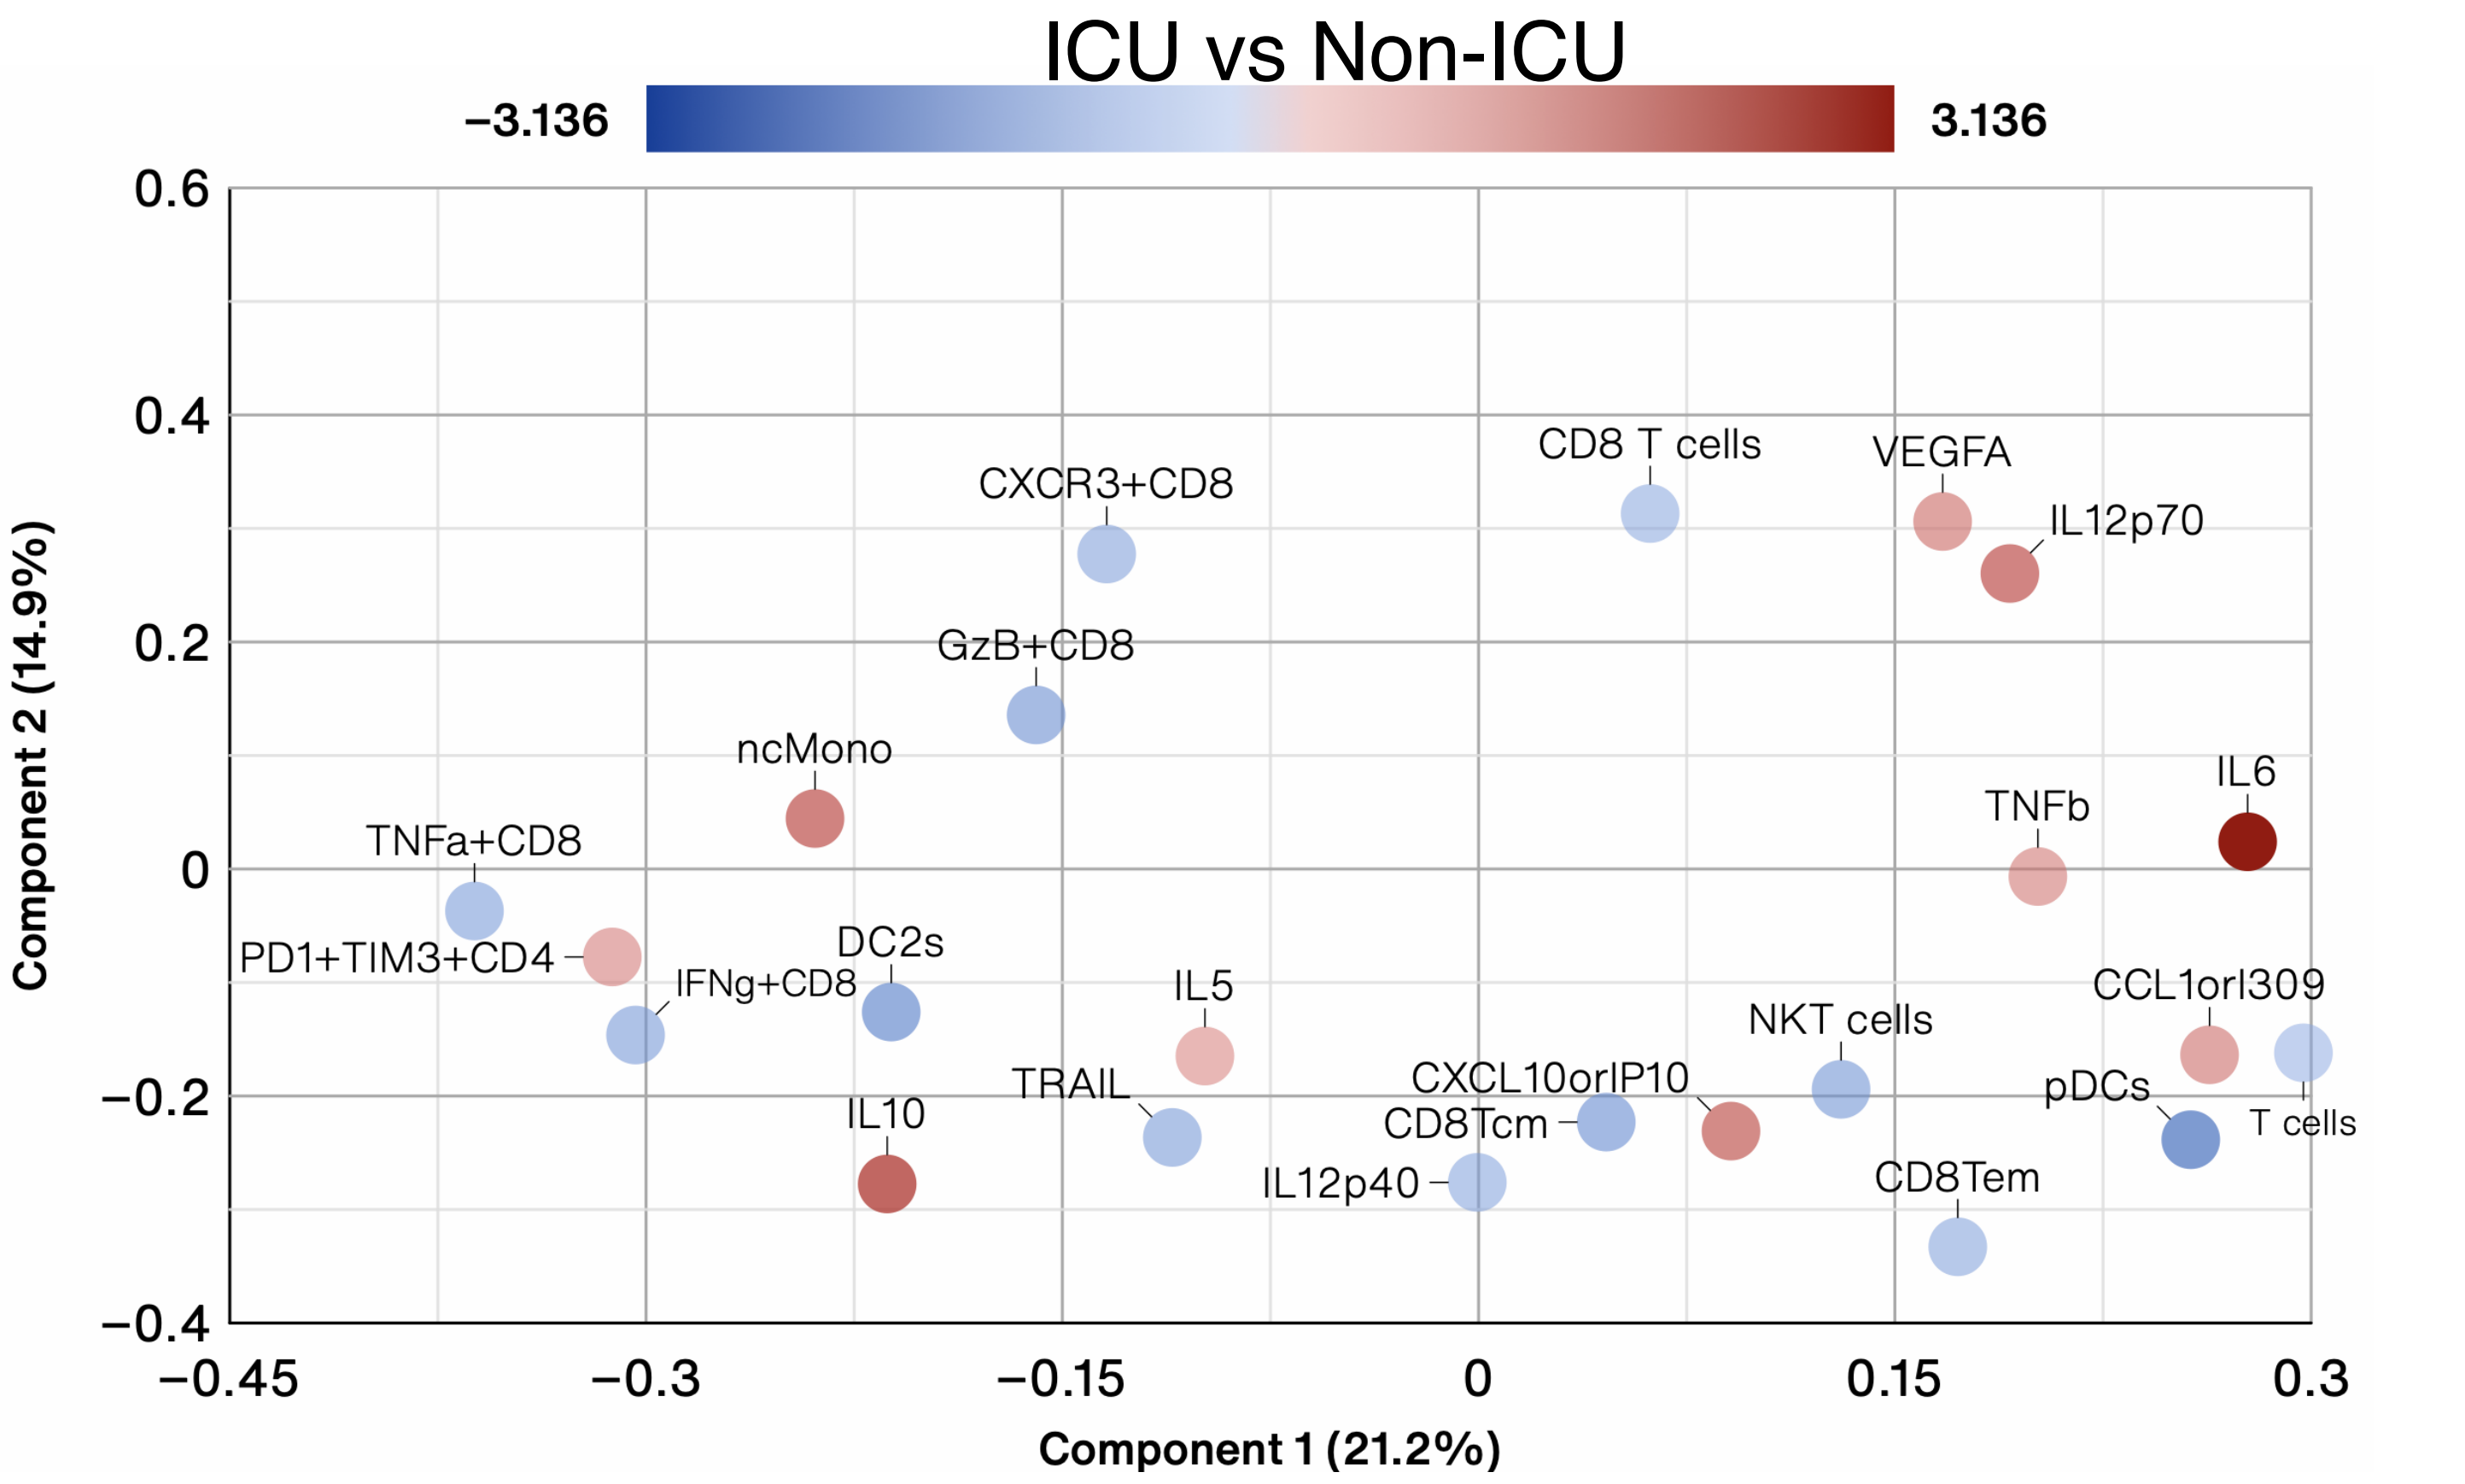

e.

Coagulopathy vs HCW

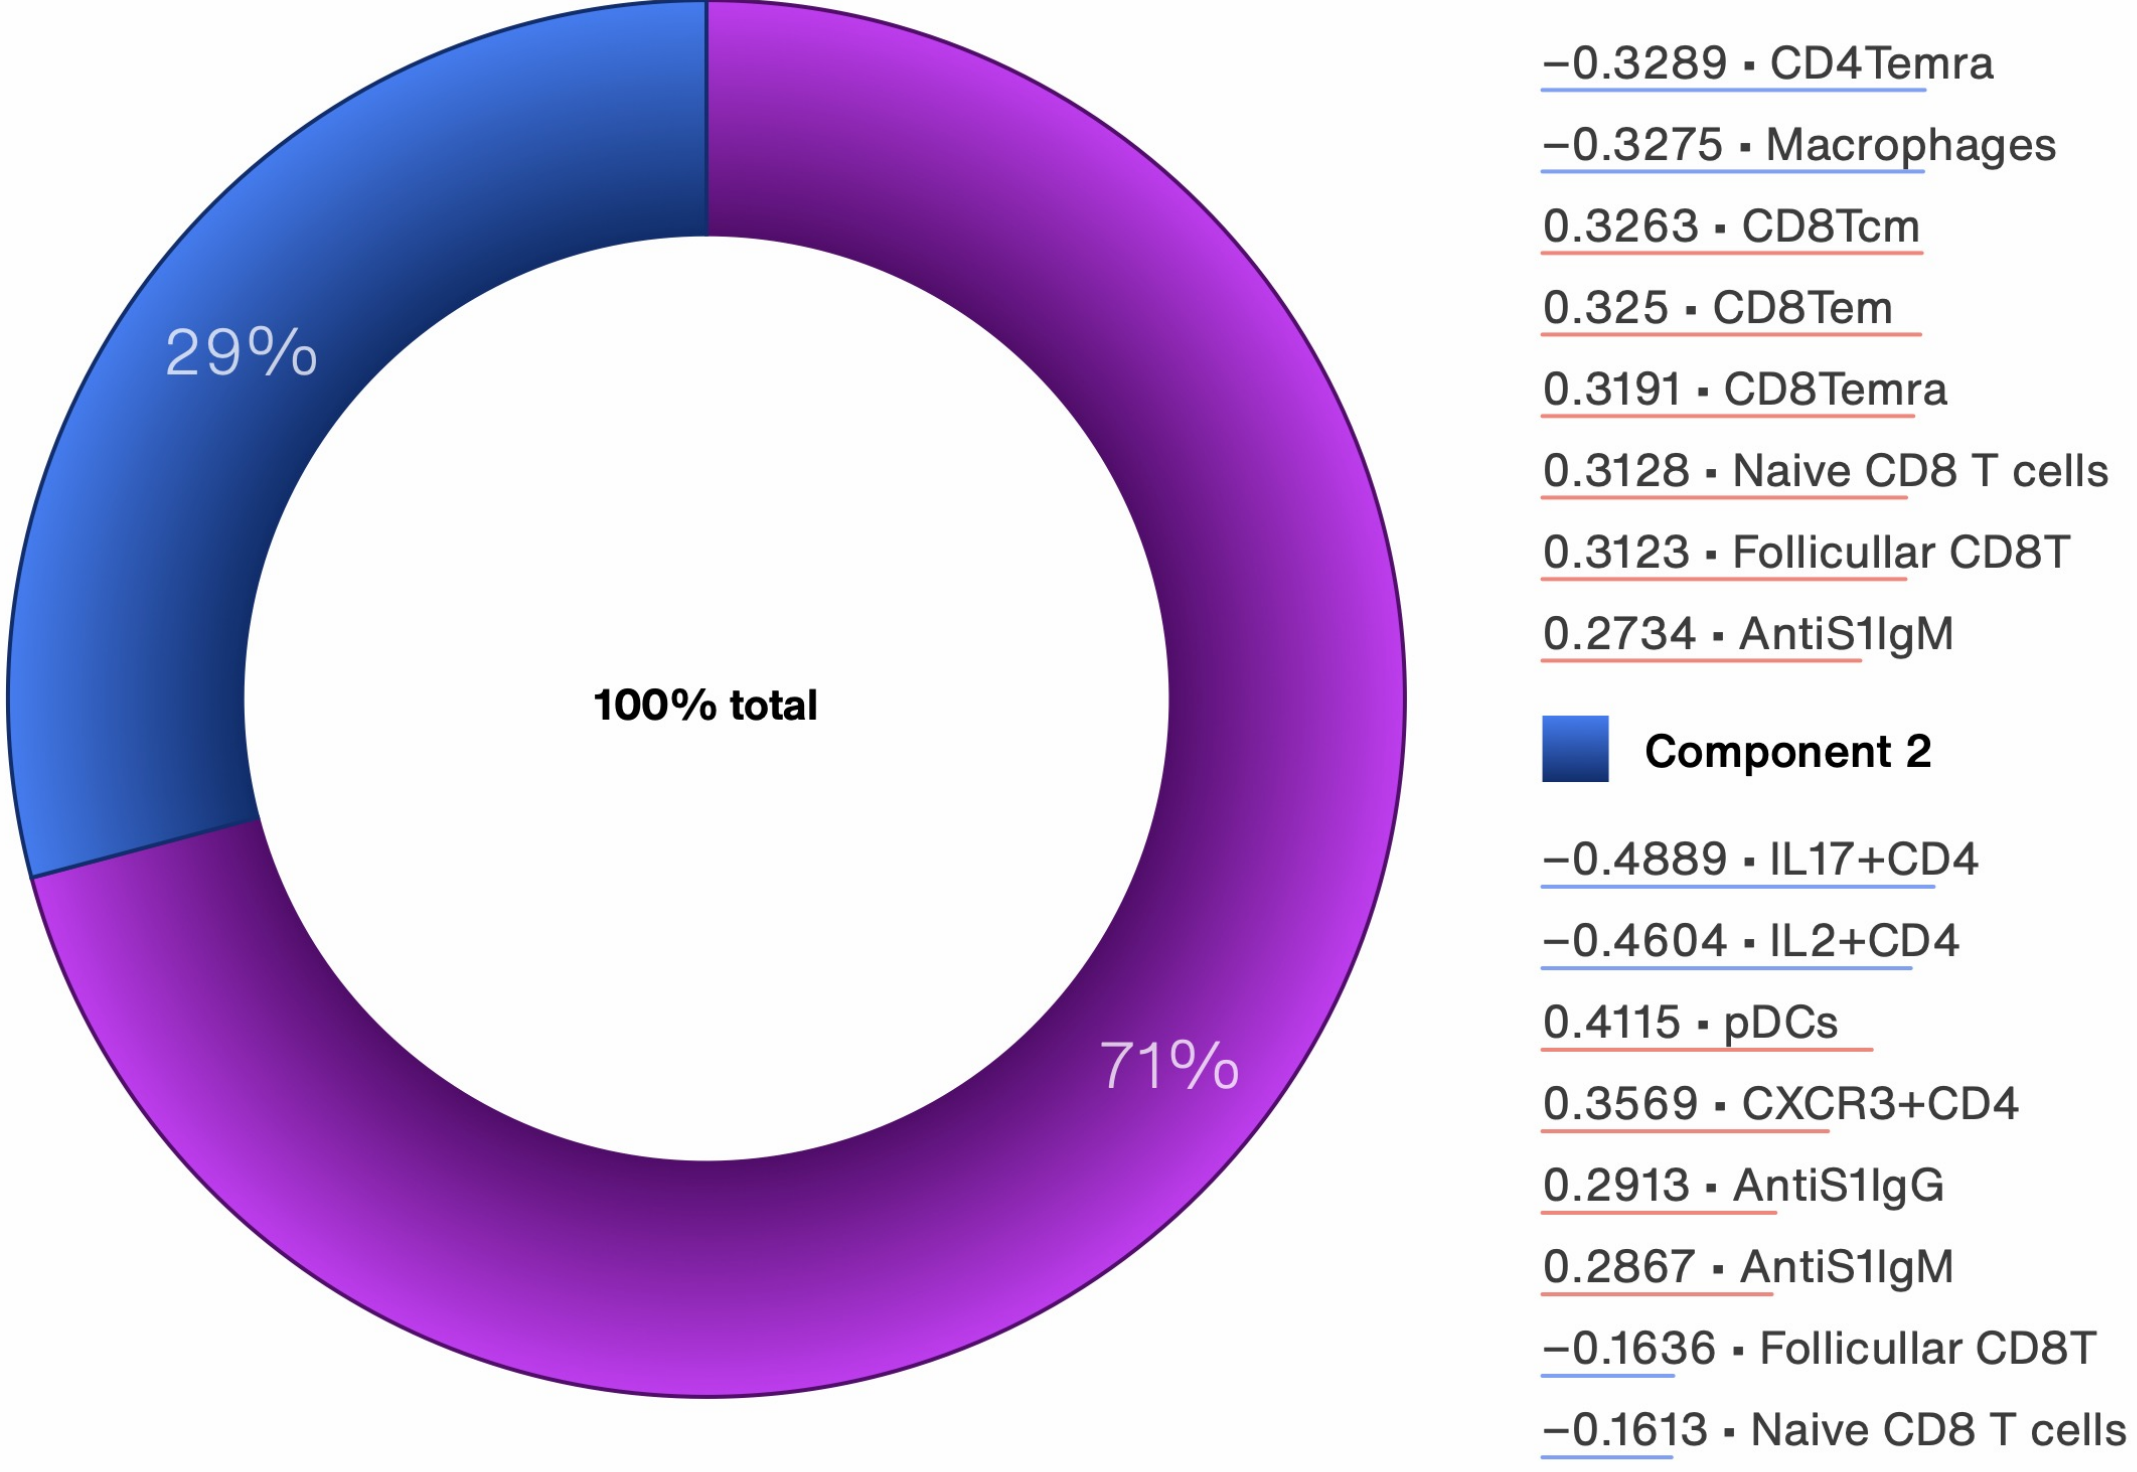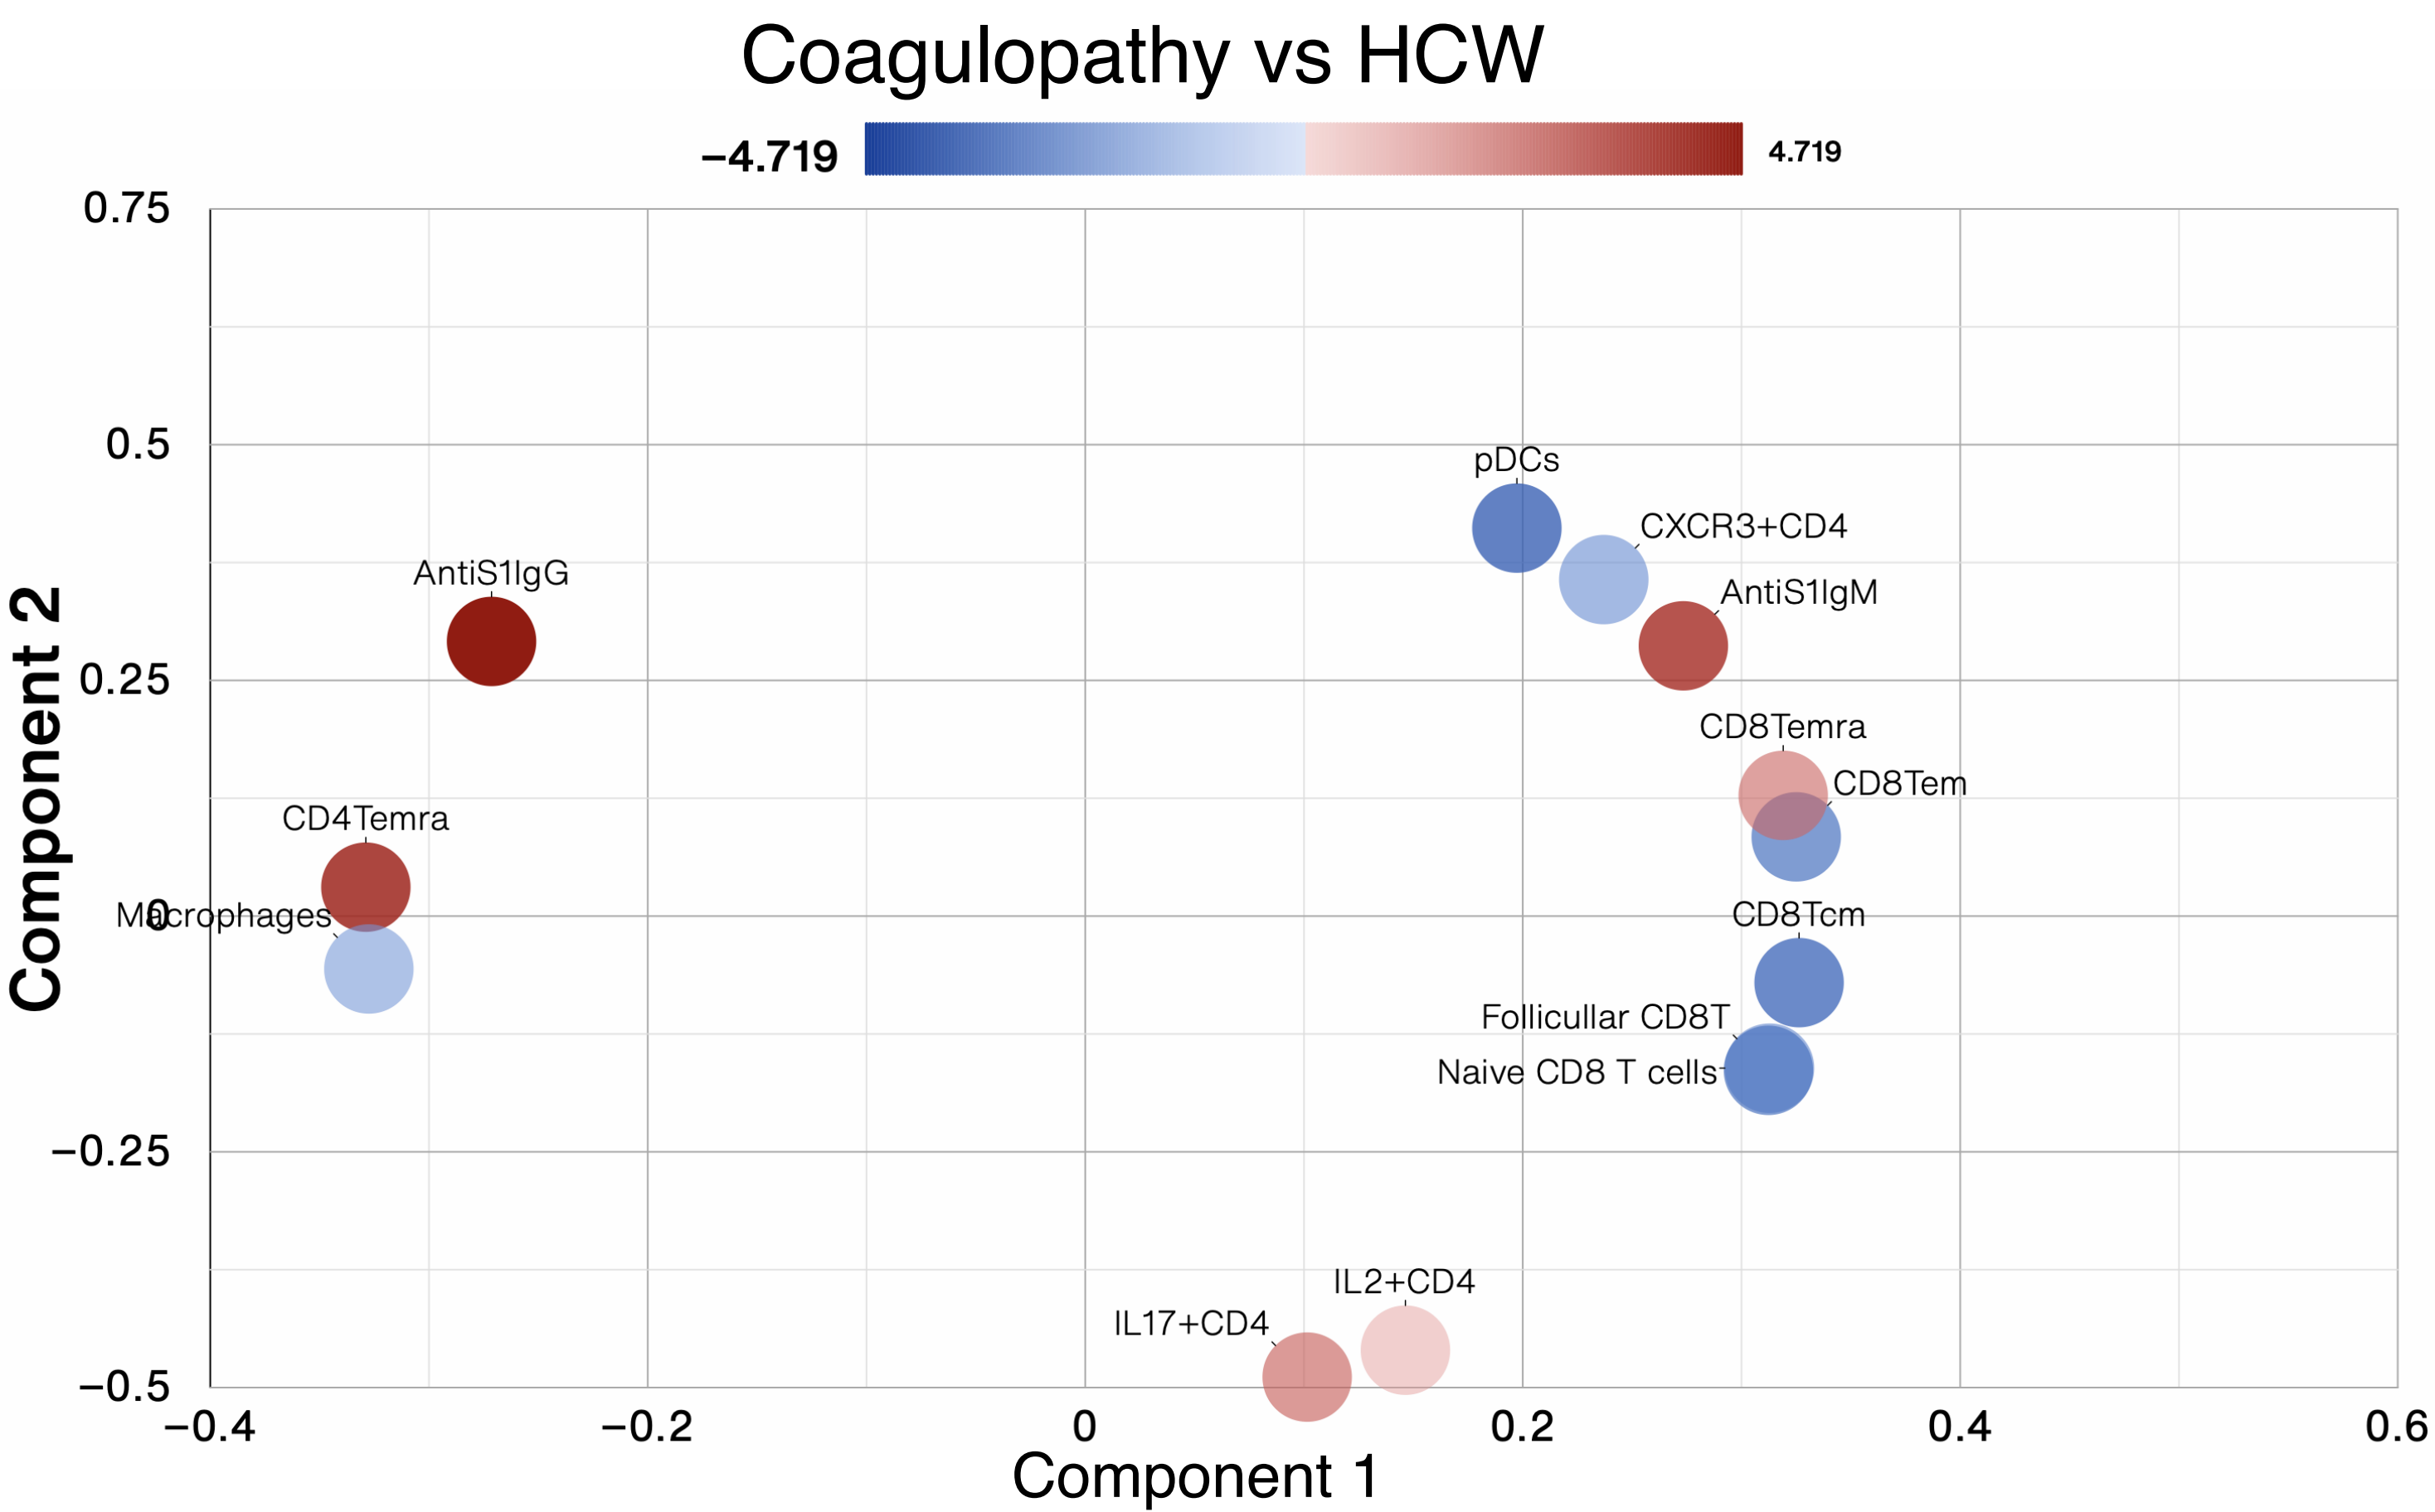

f.

Coagulopathy vs Non-ICU

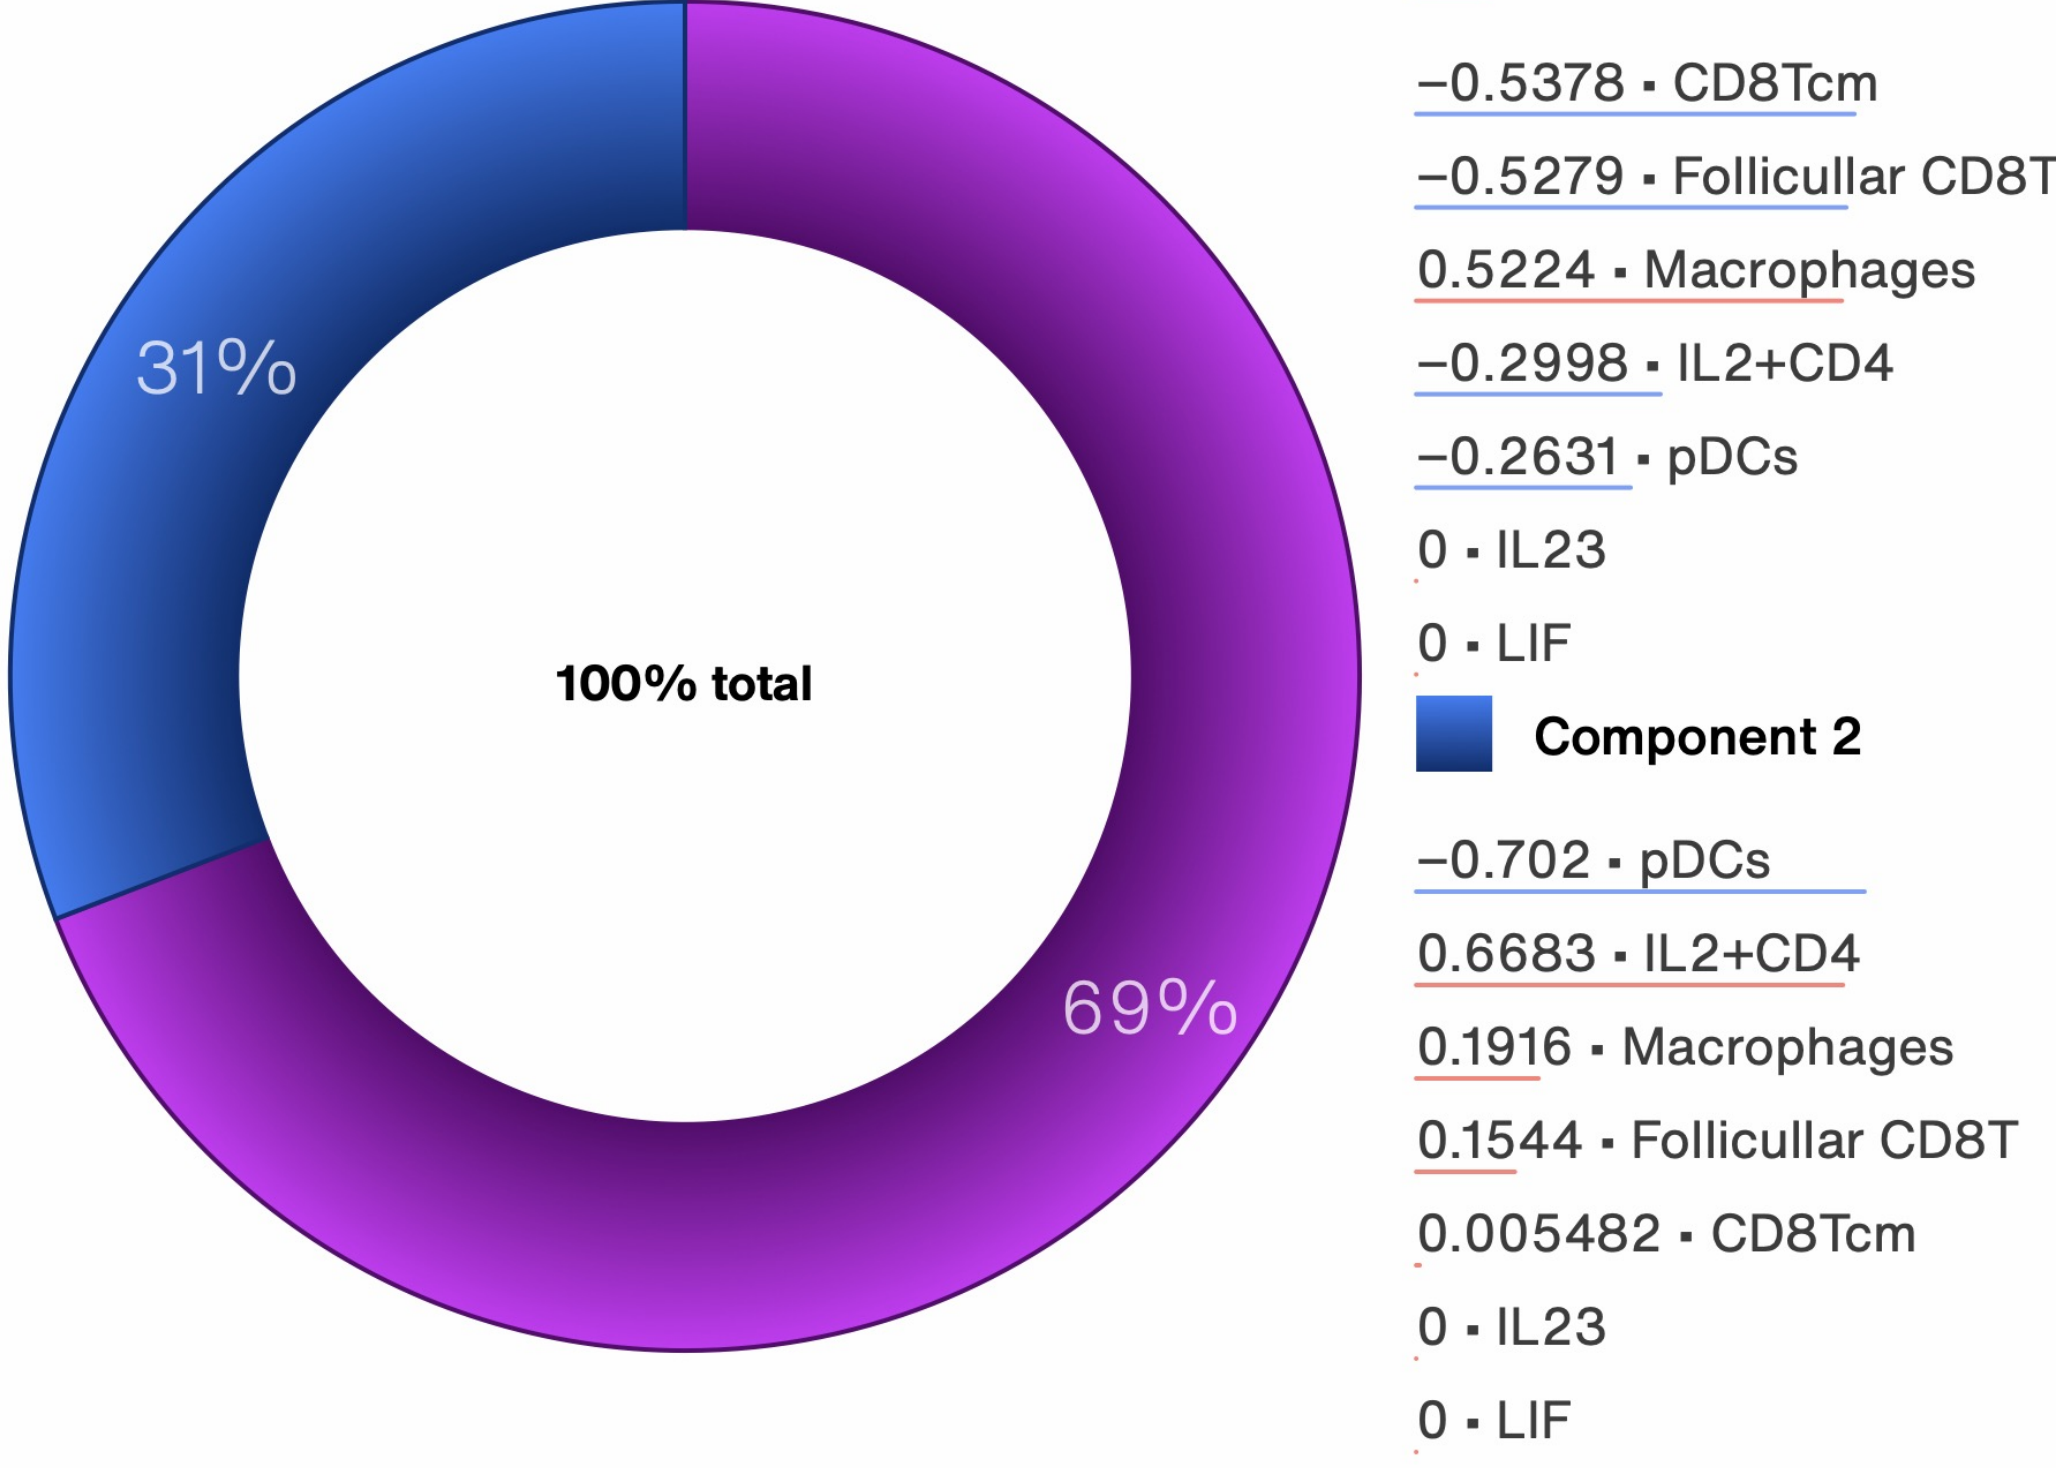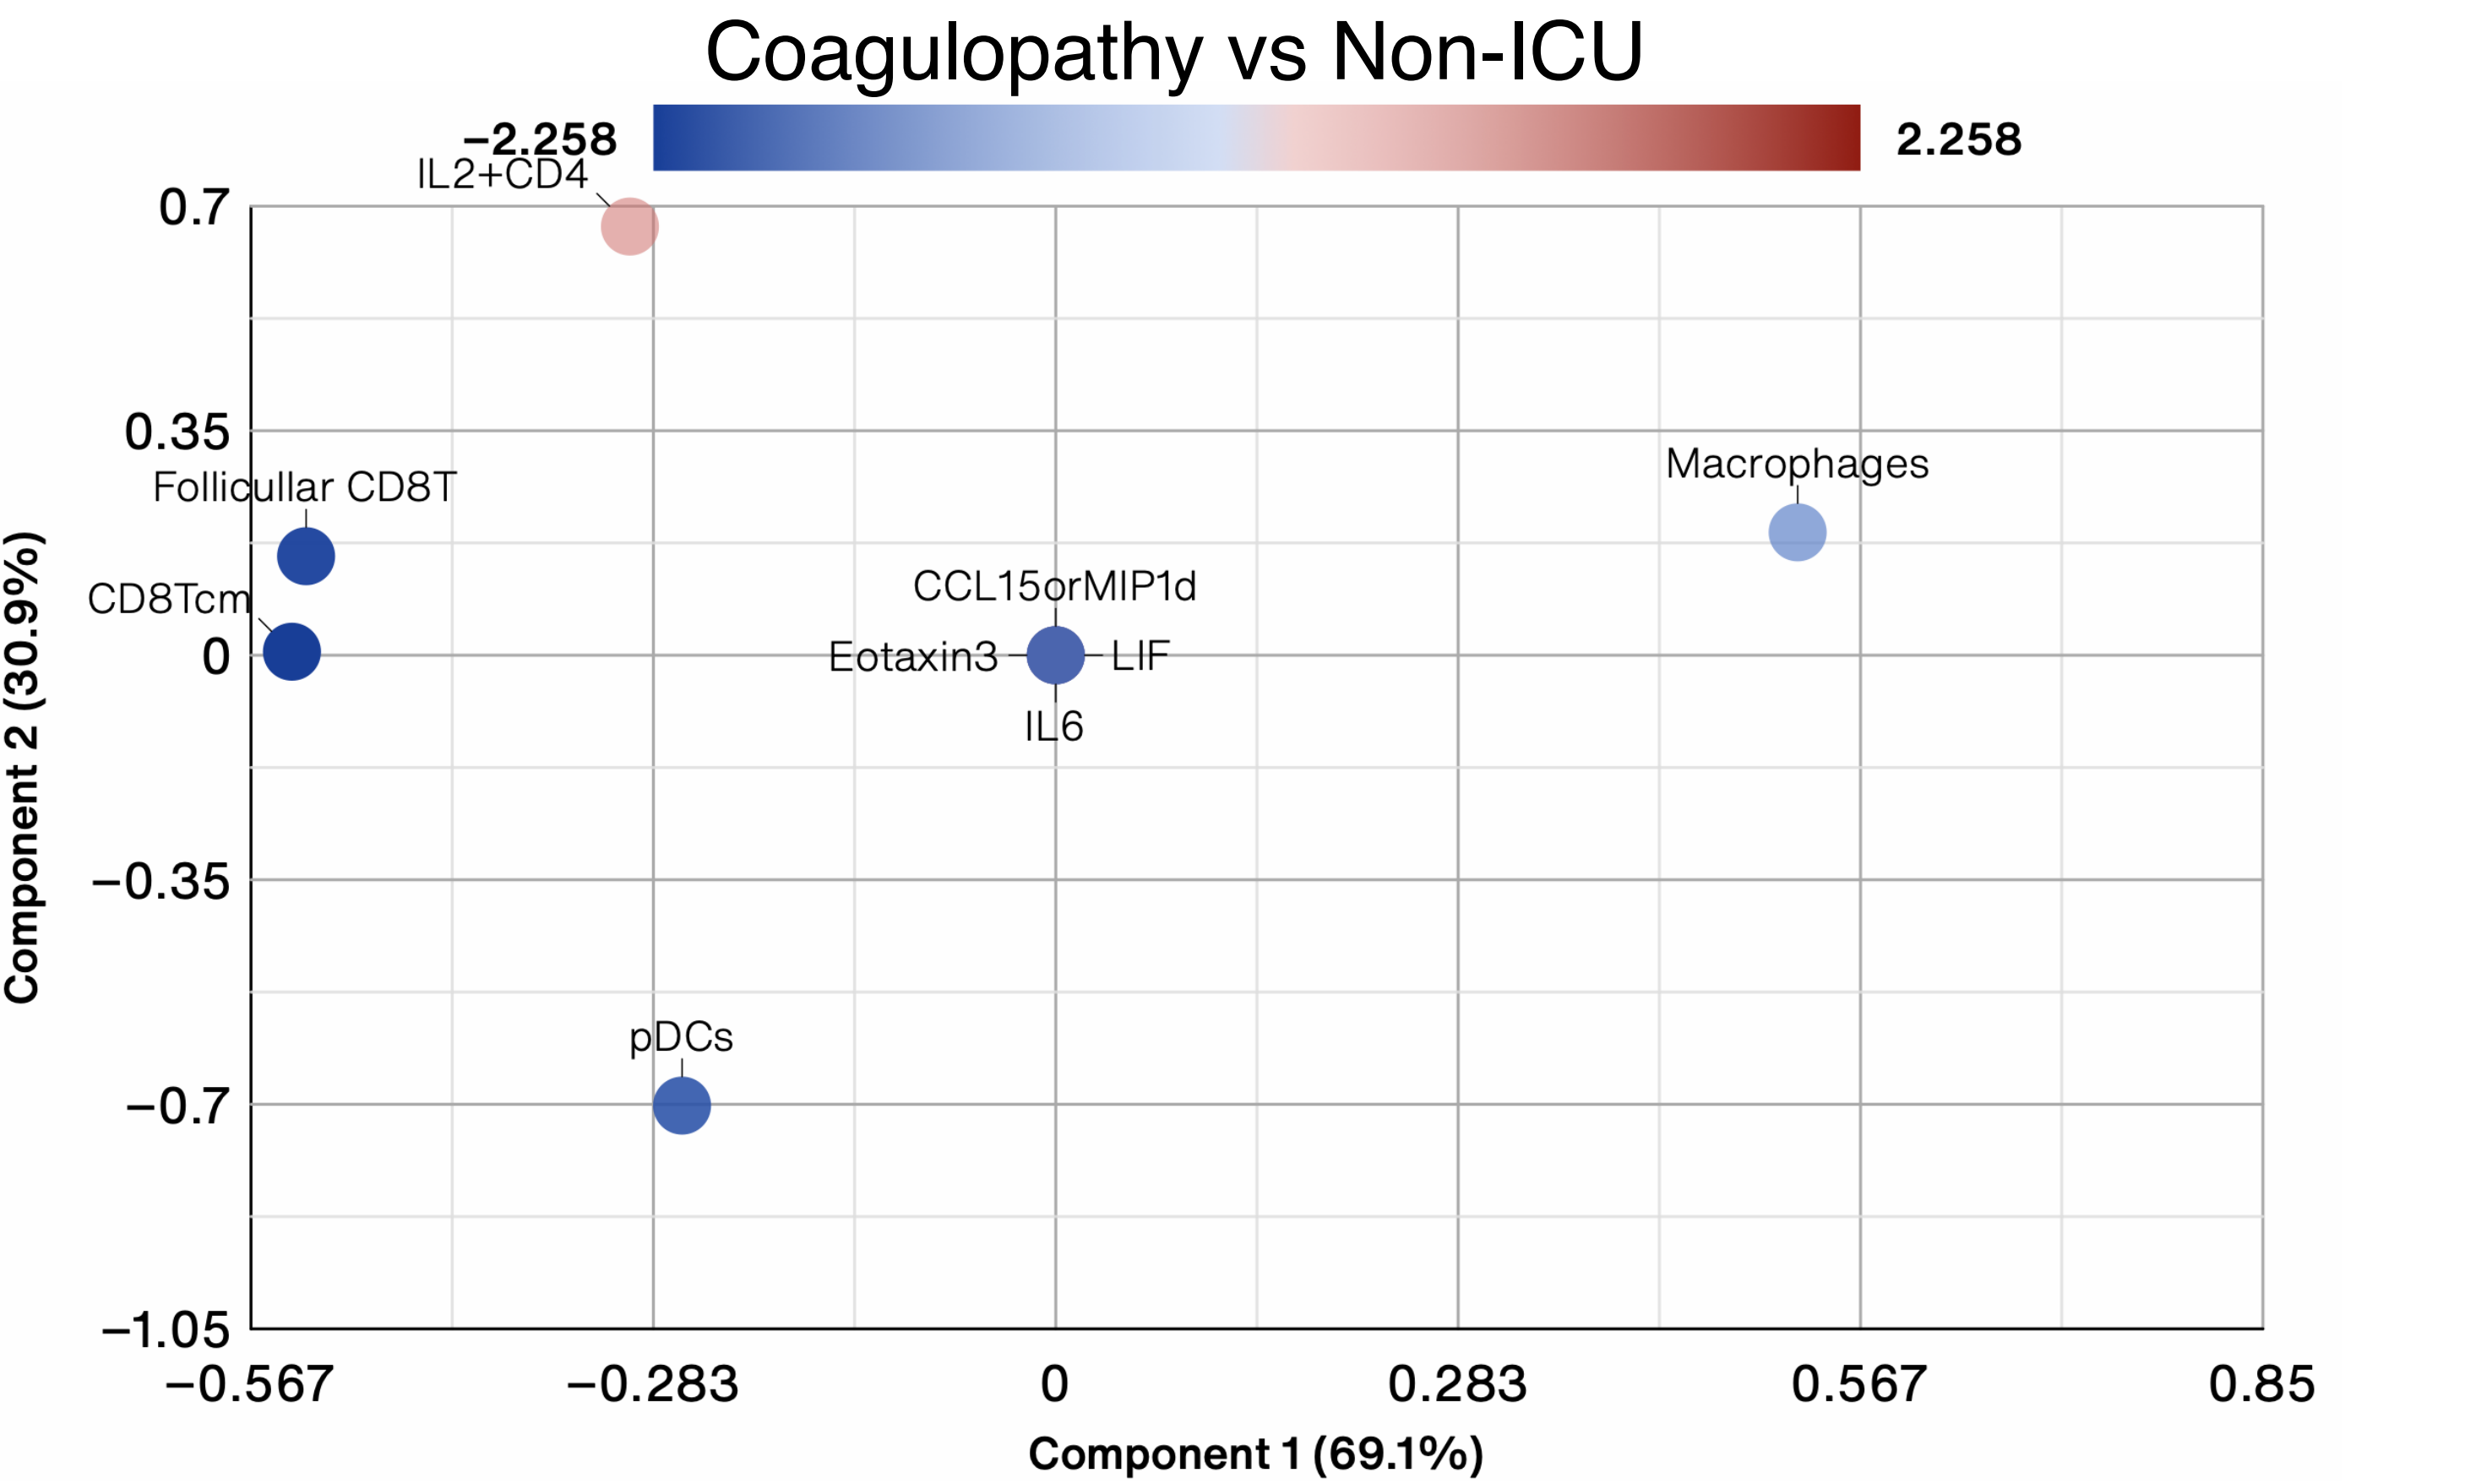



Fig.S4

a.

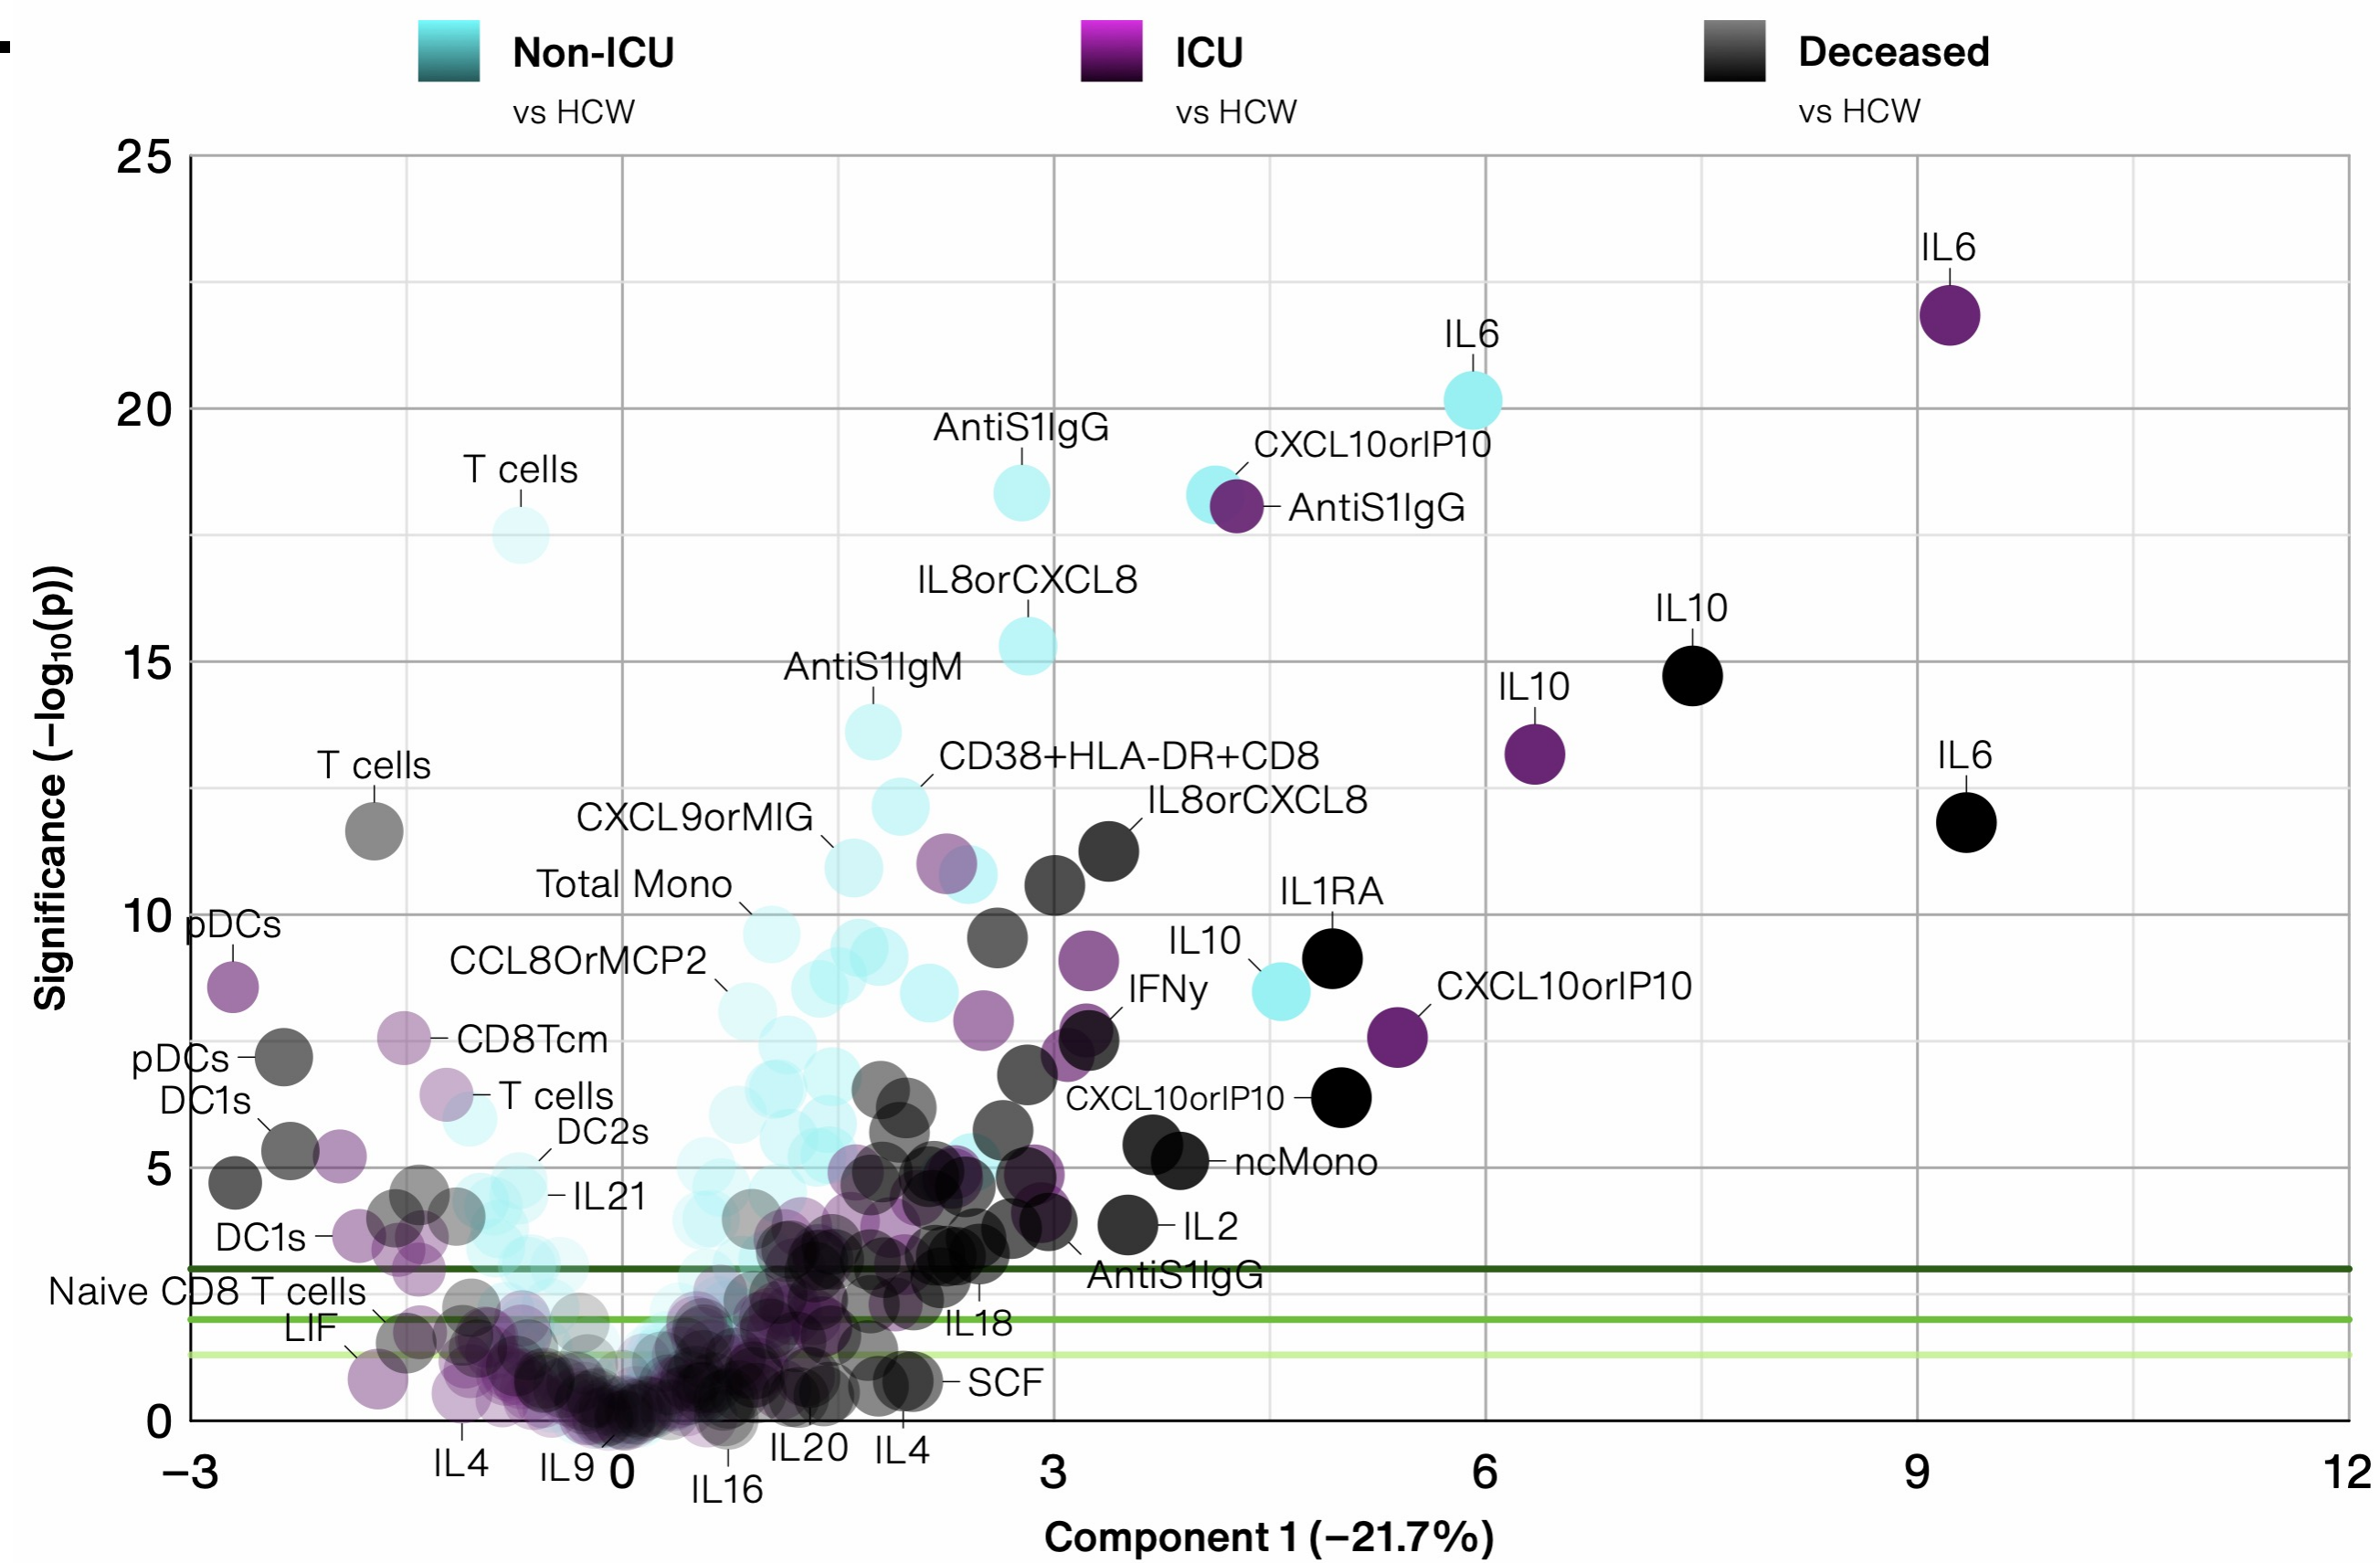

b.

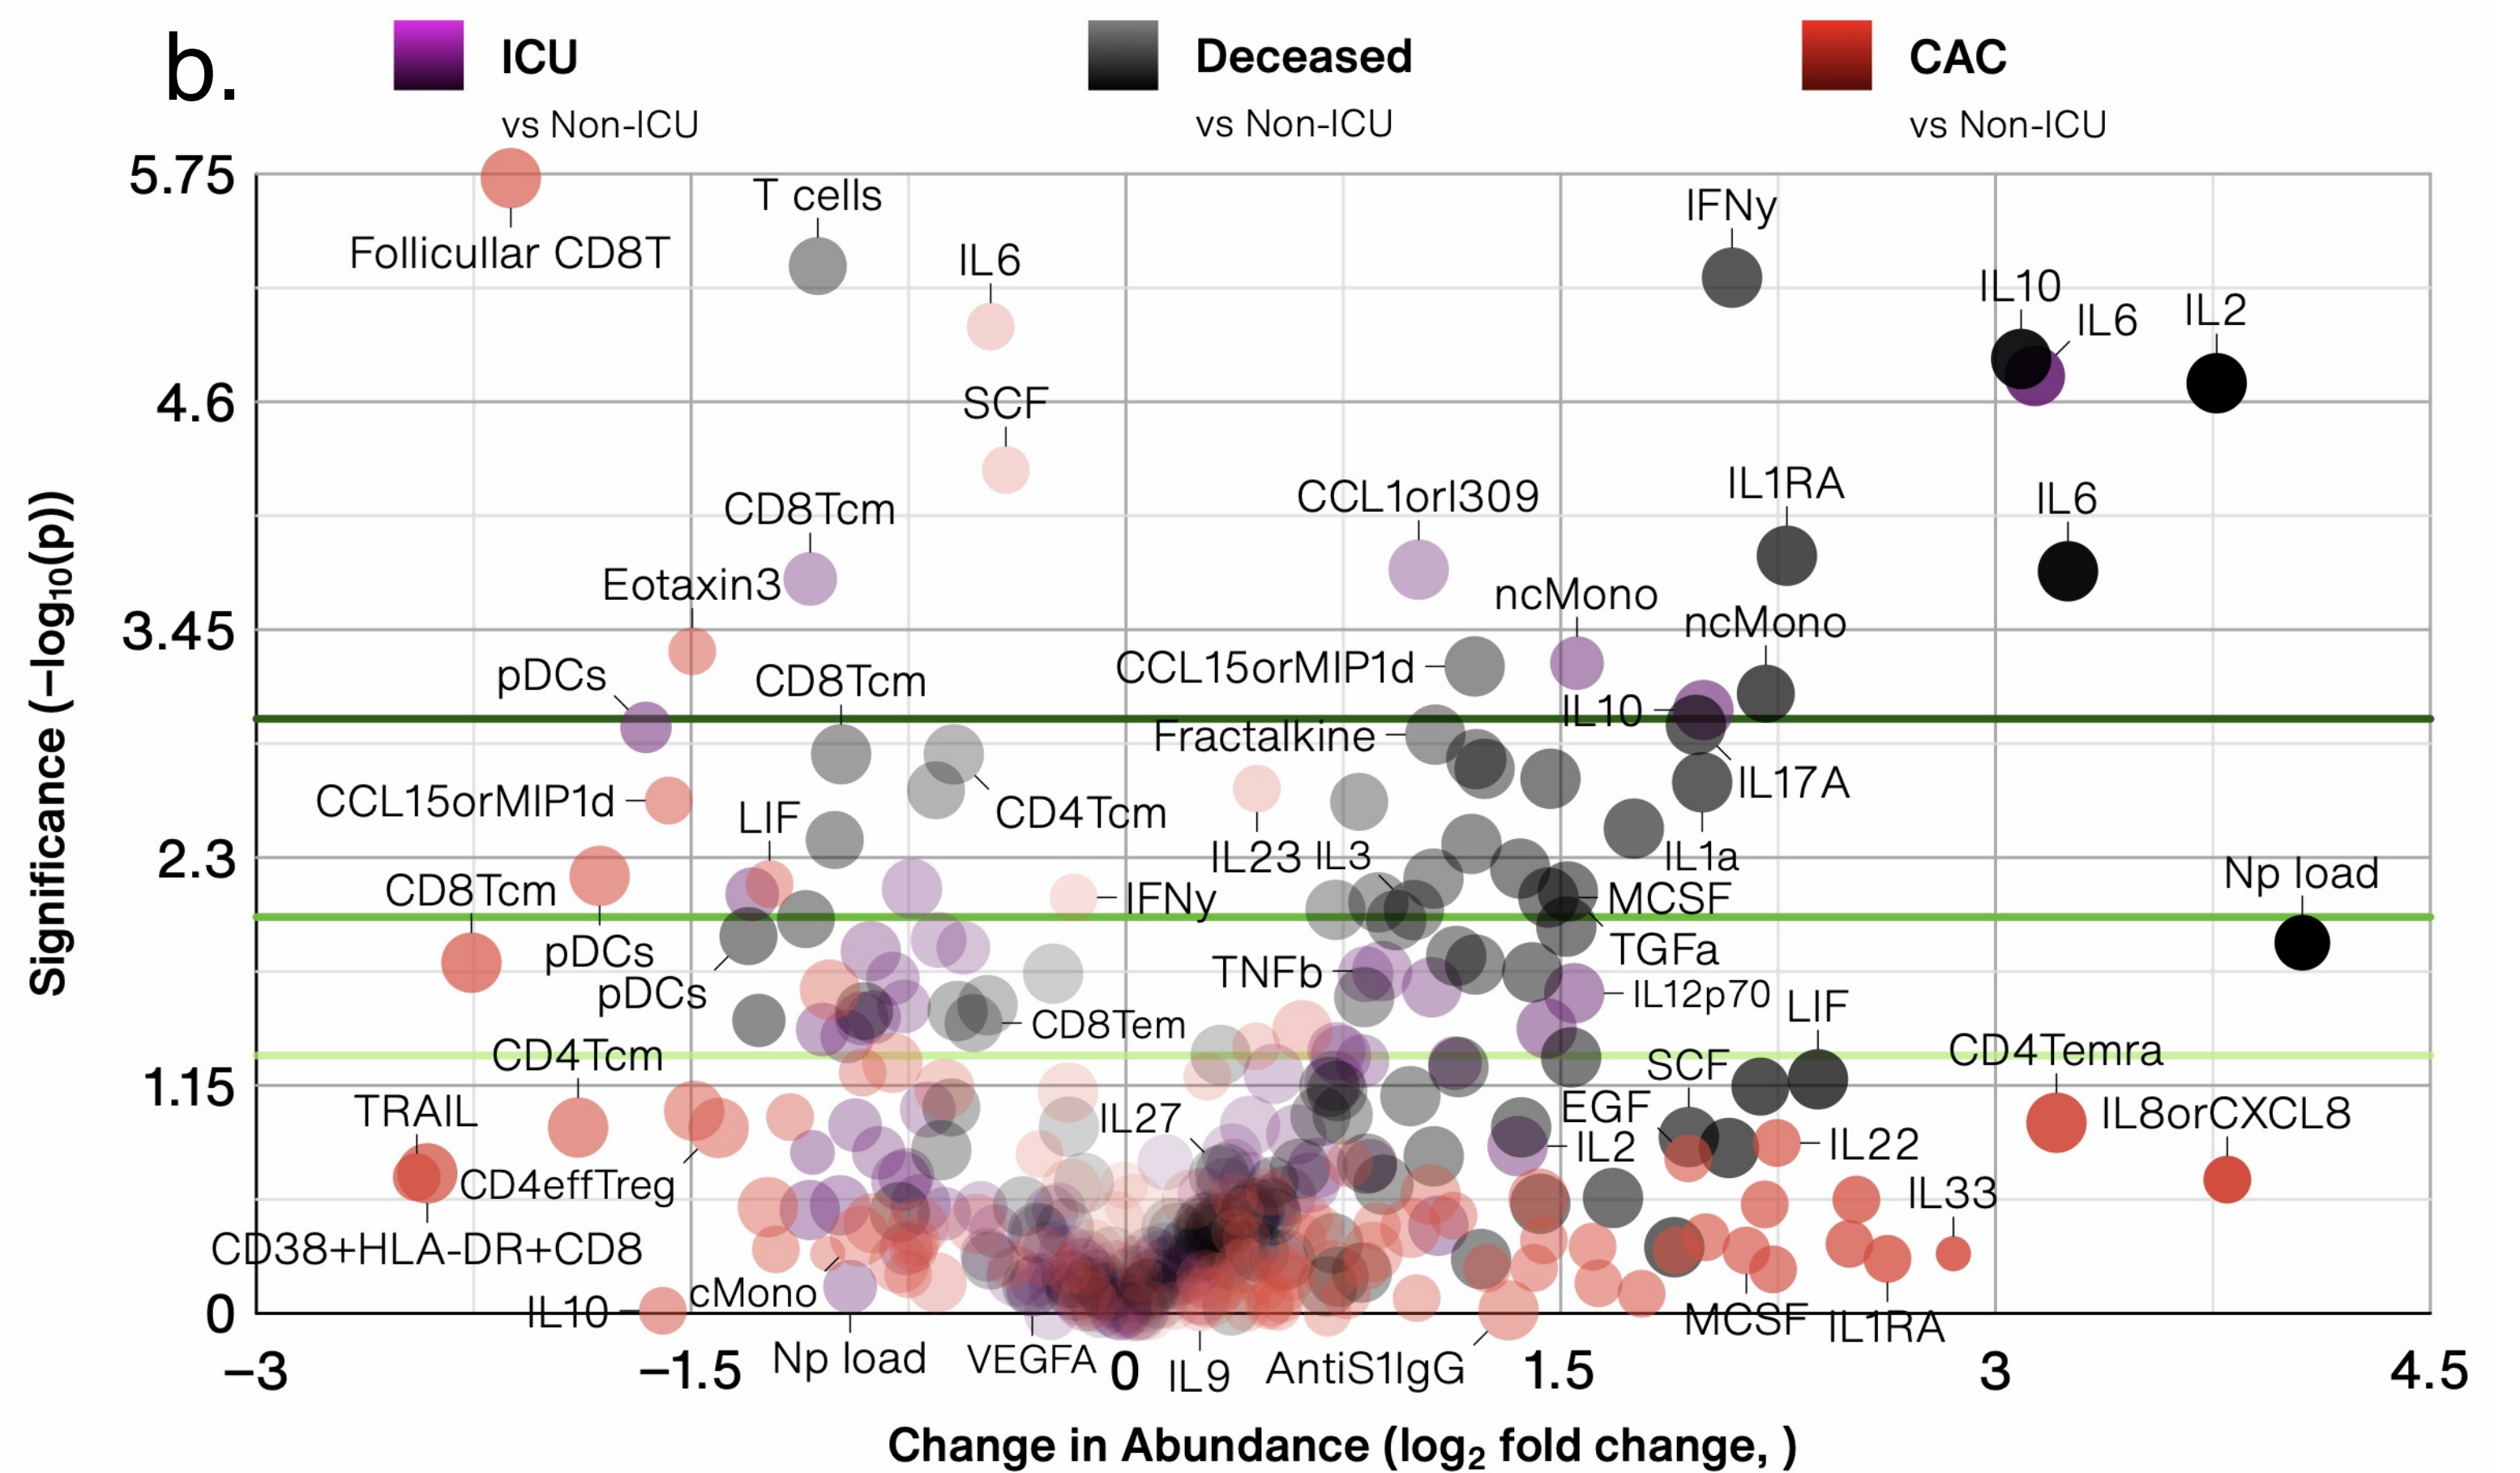

c.

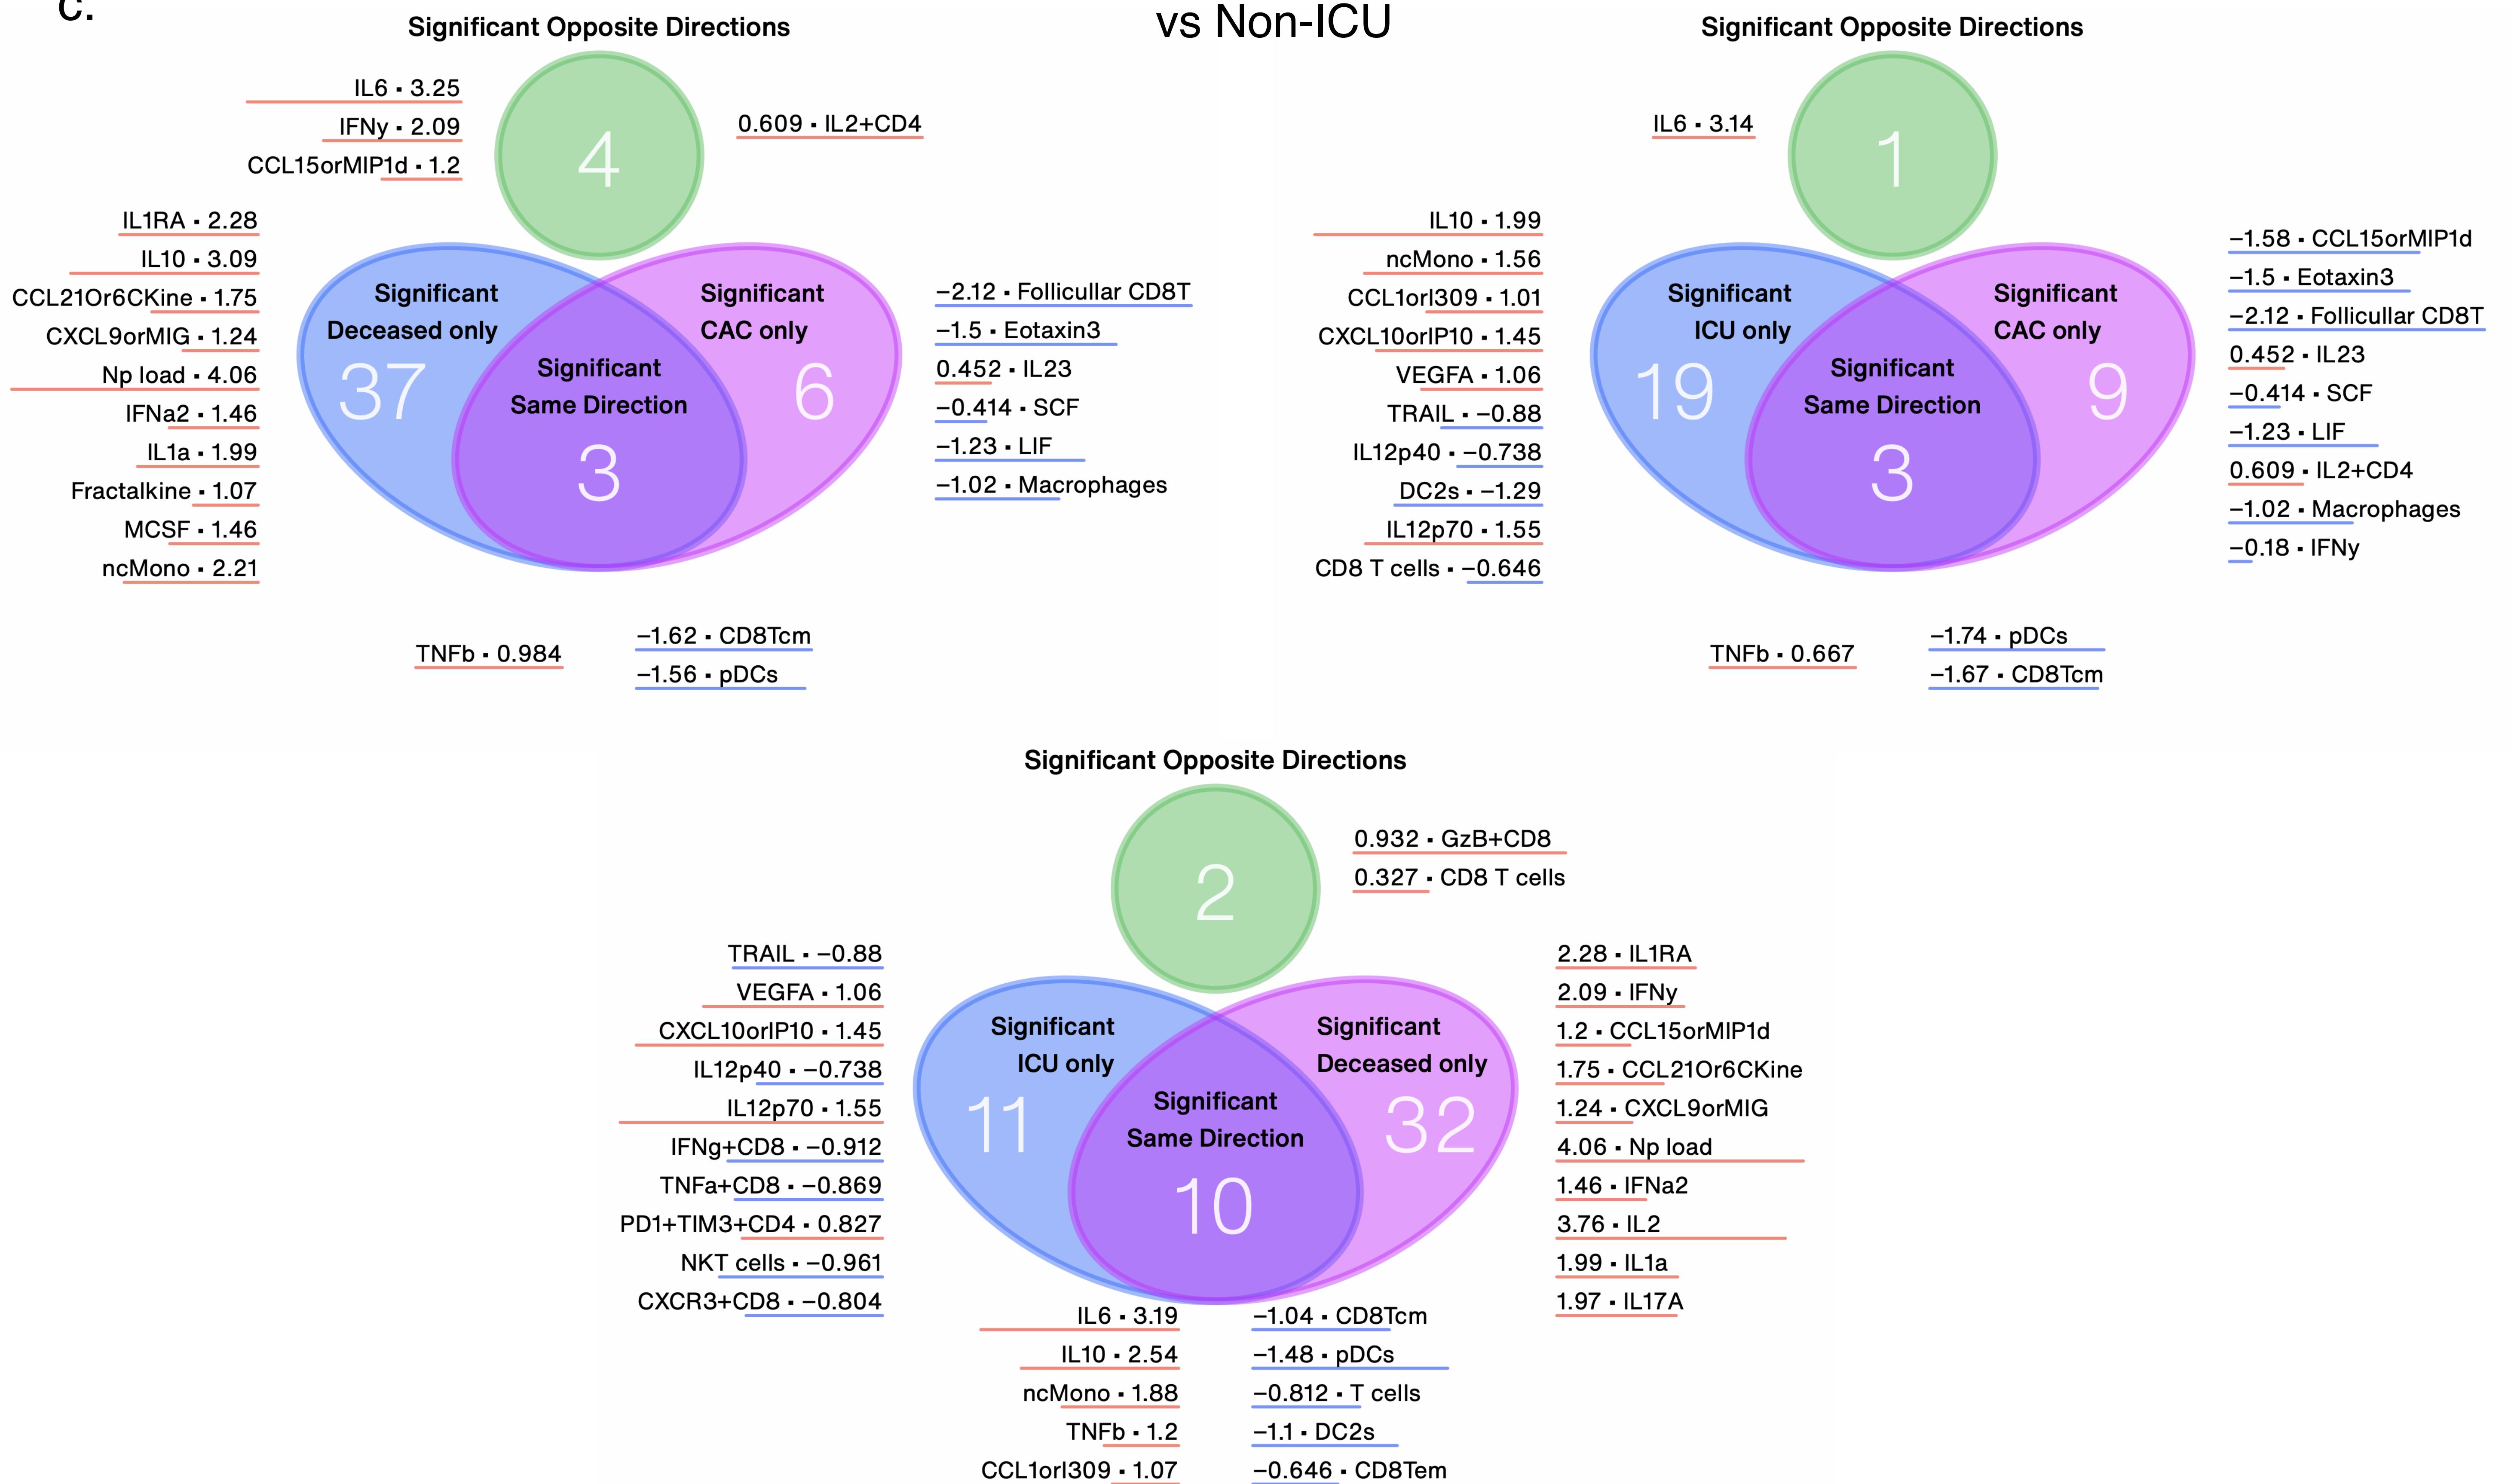



a.

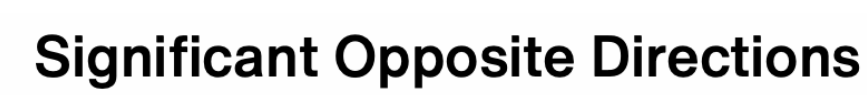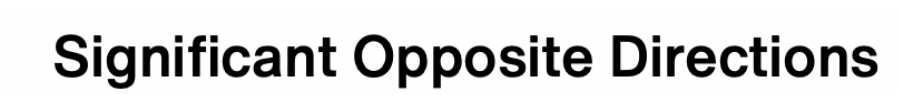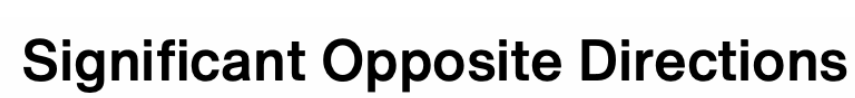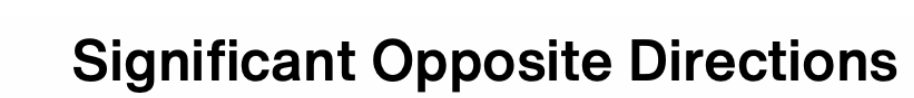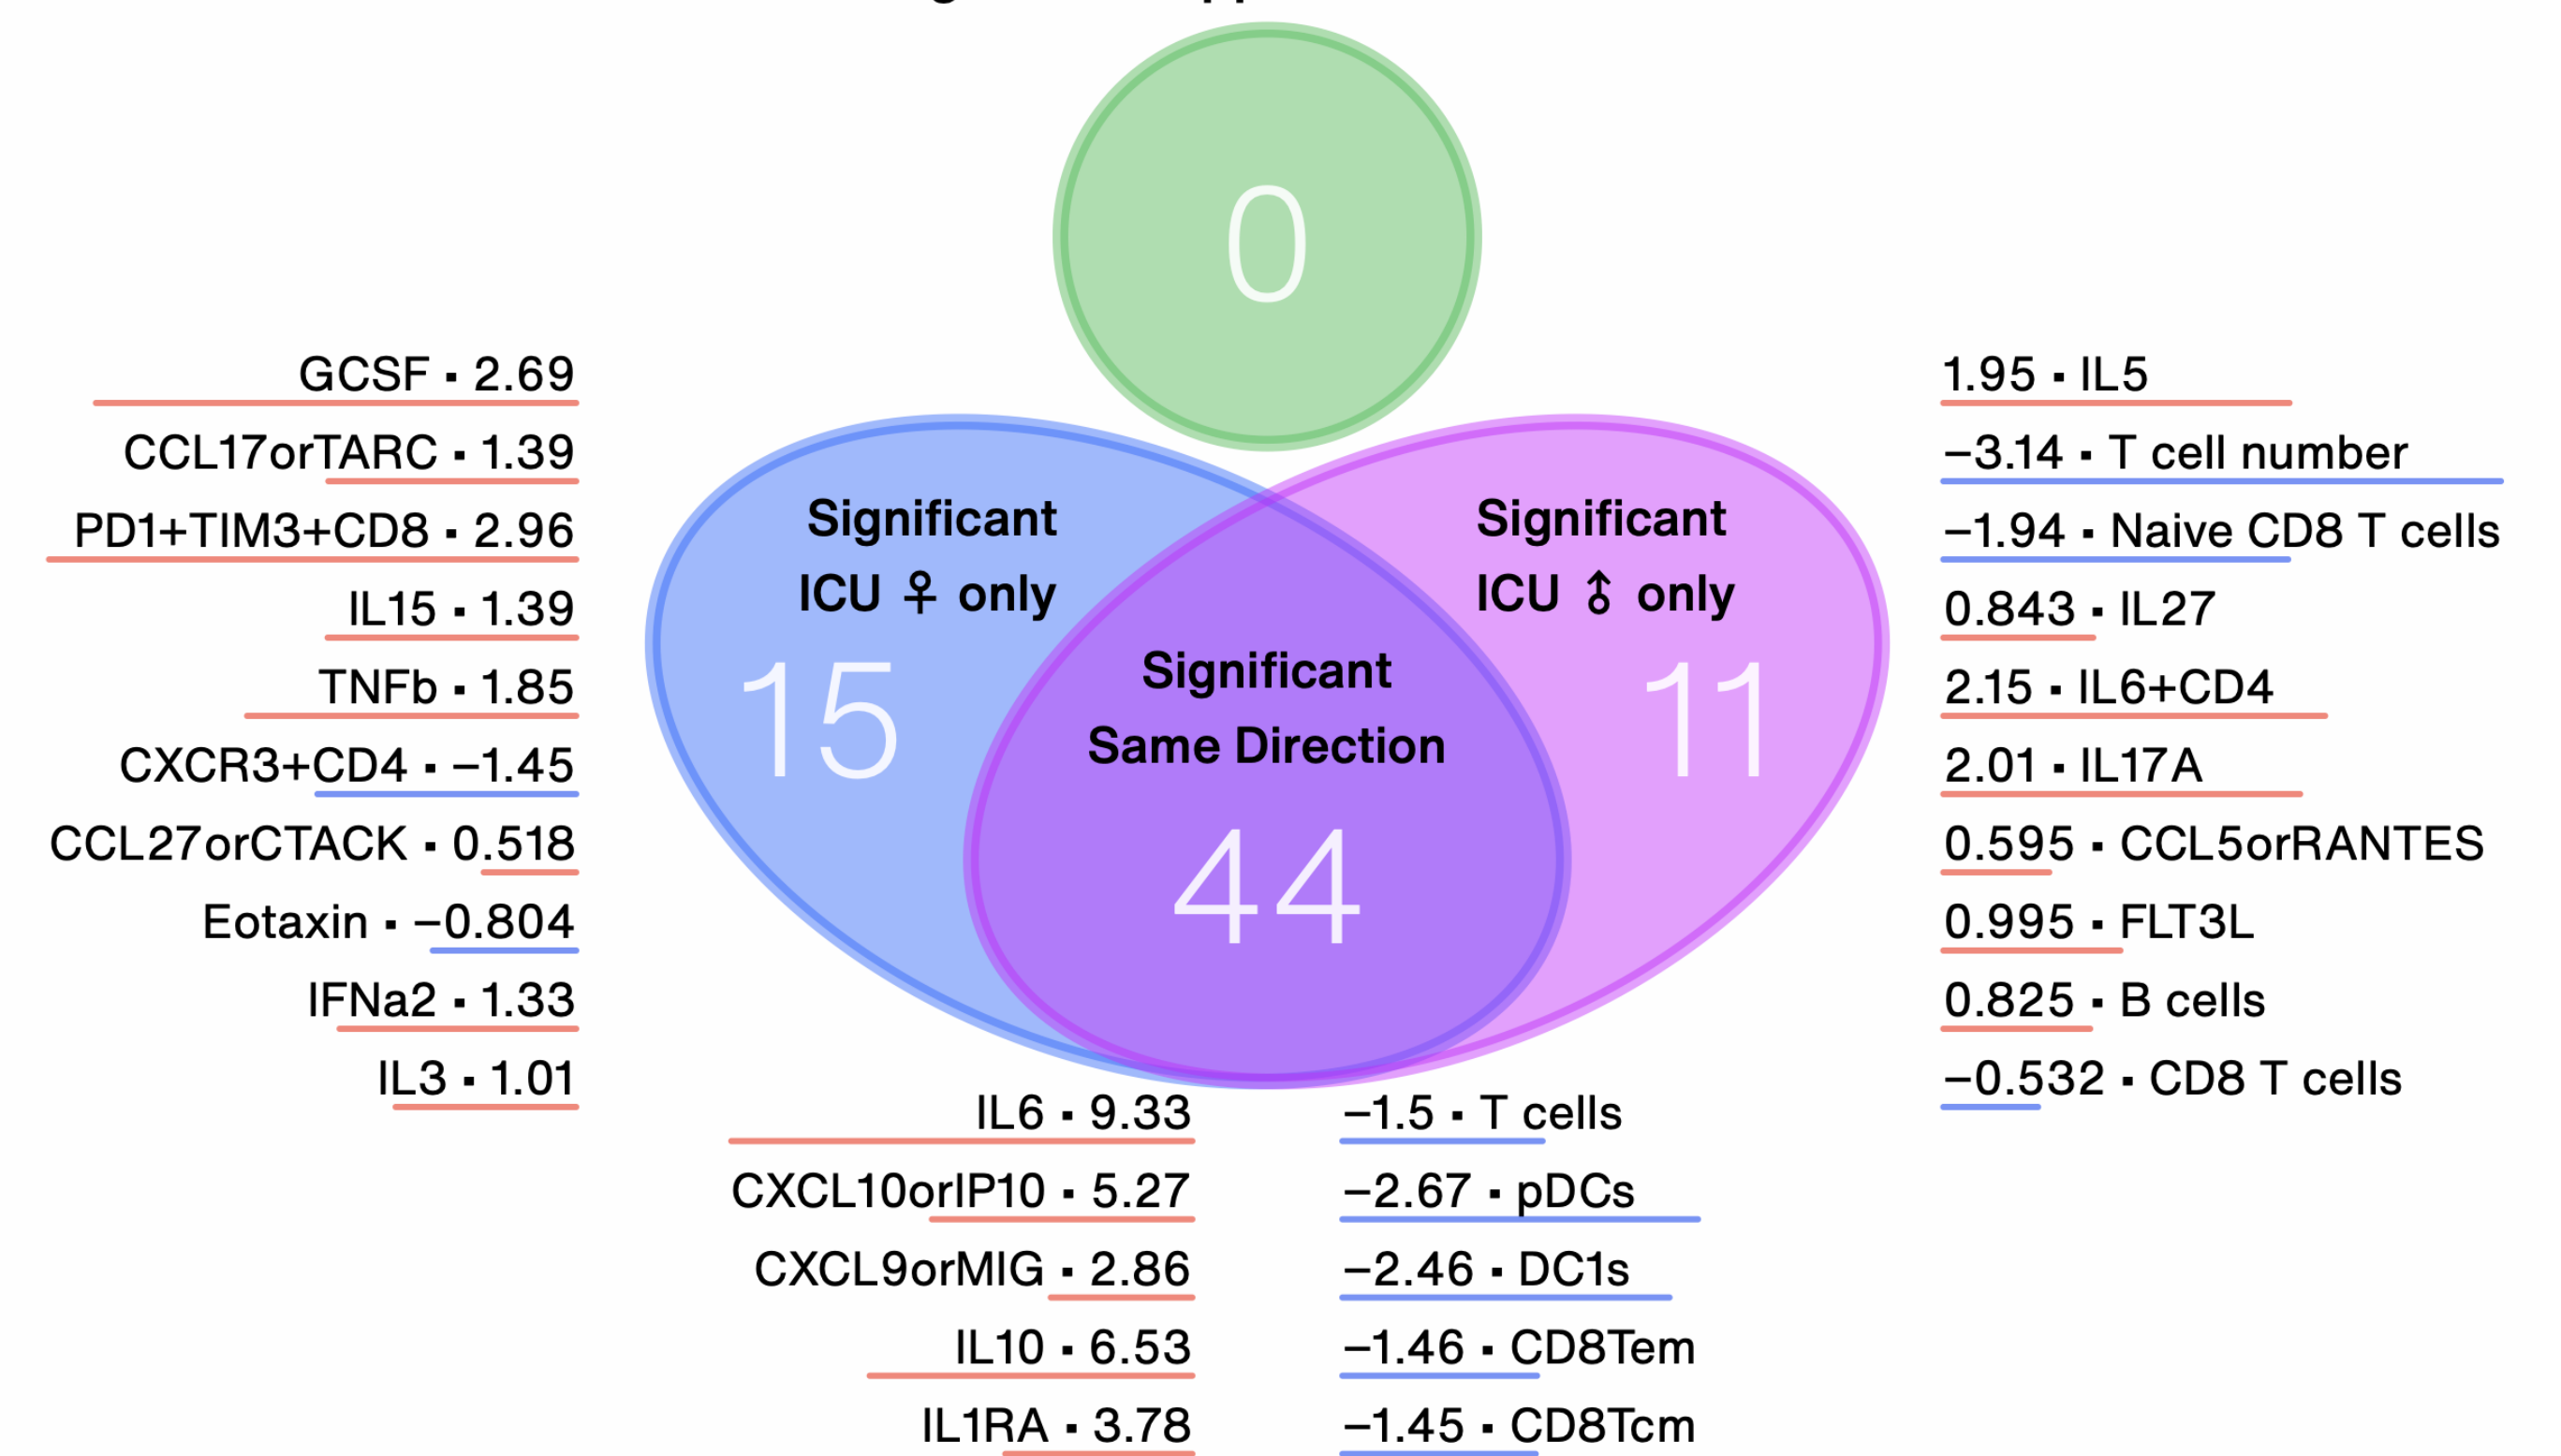



Fig. S5

b.

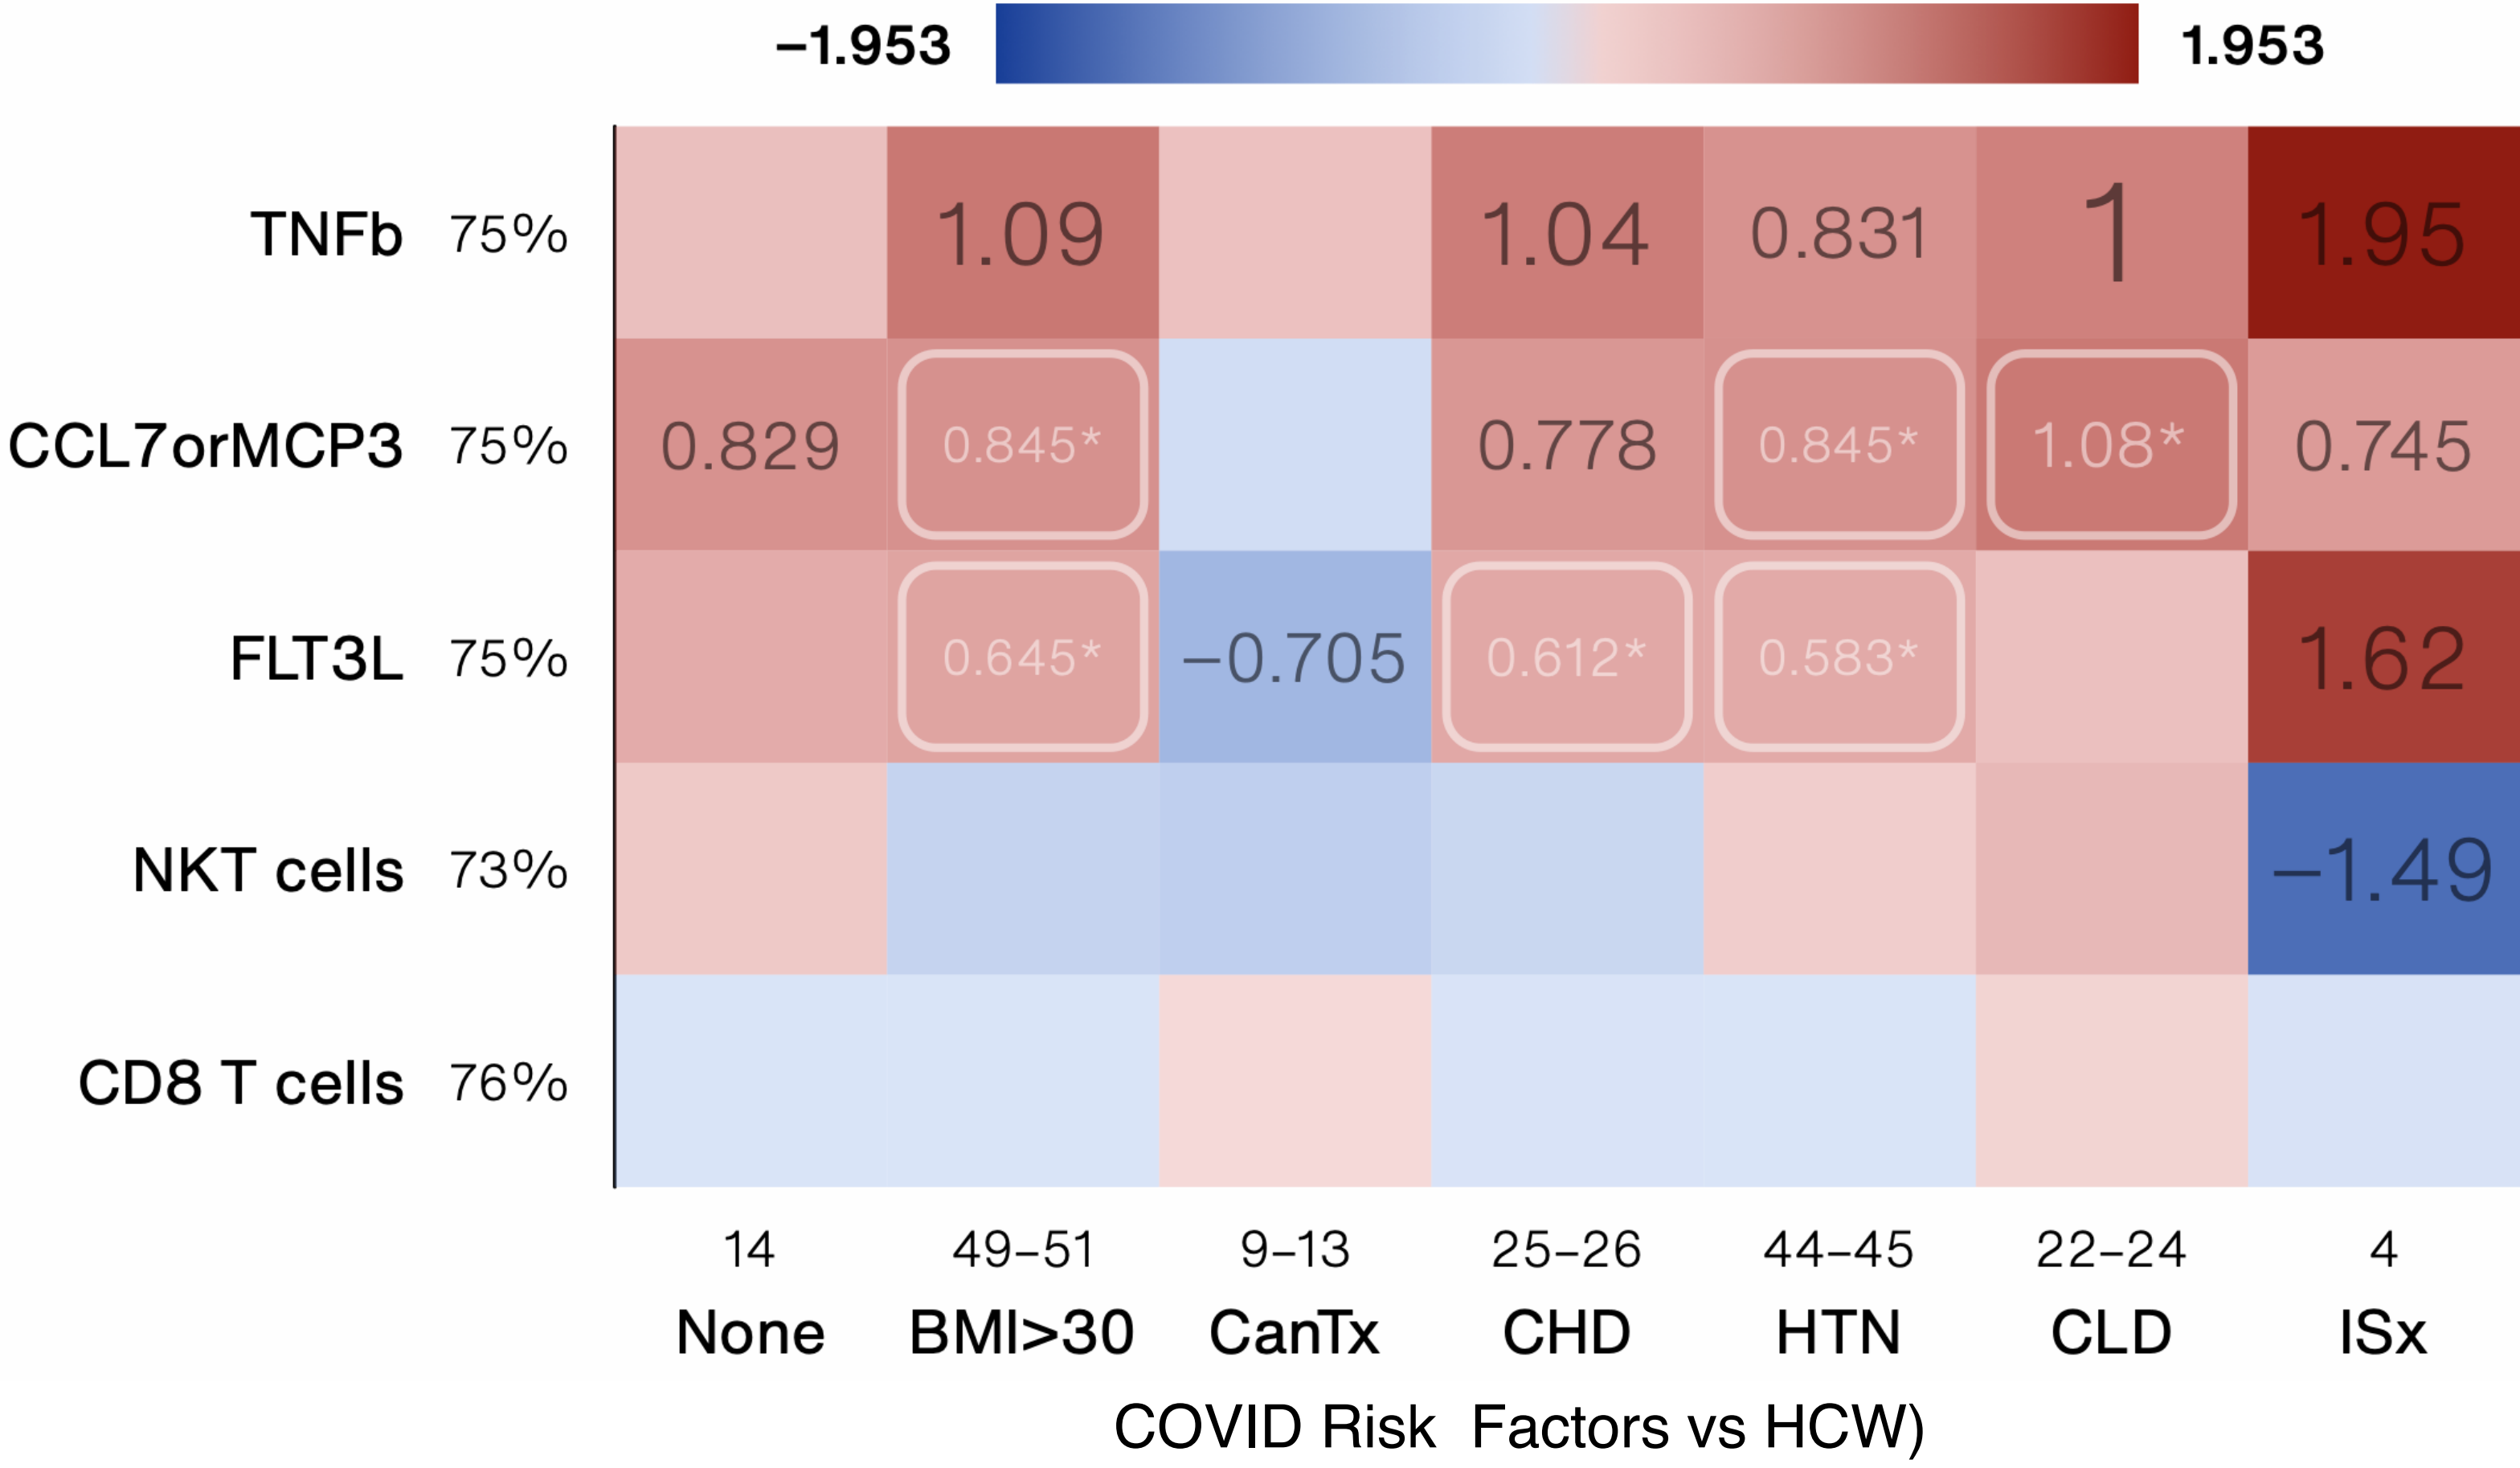

c.

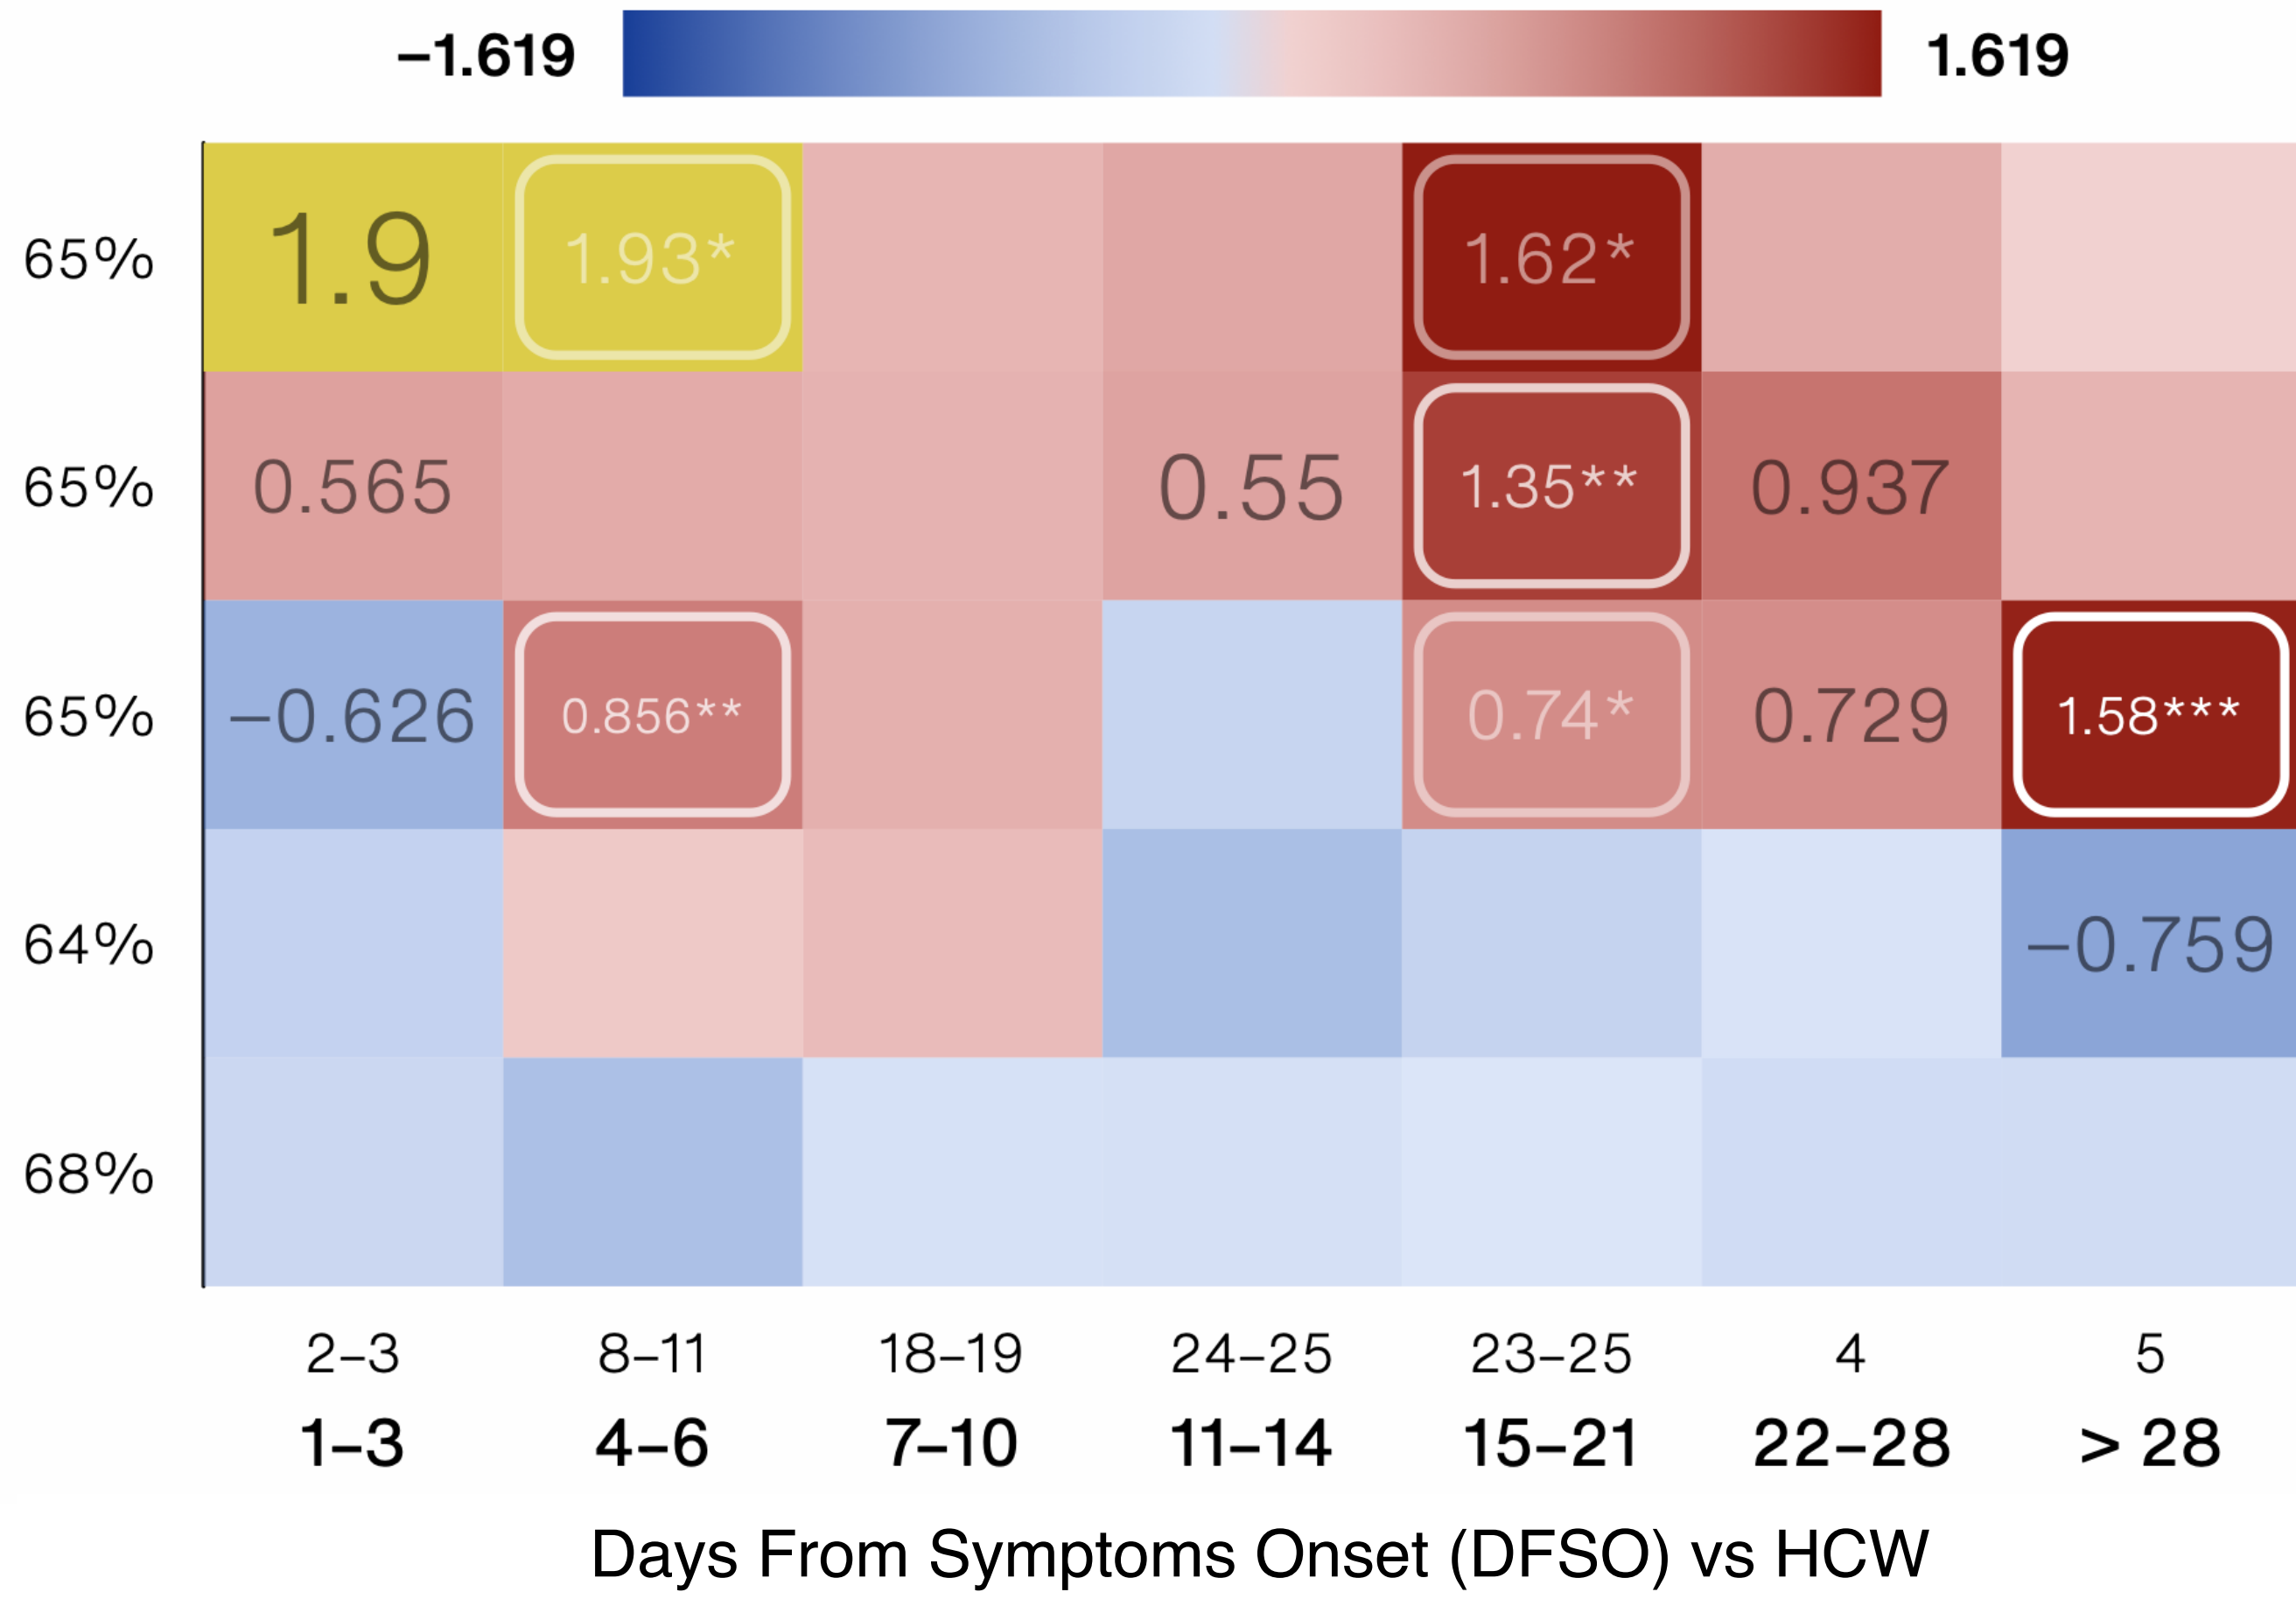

d.

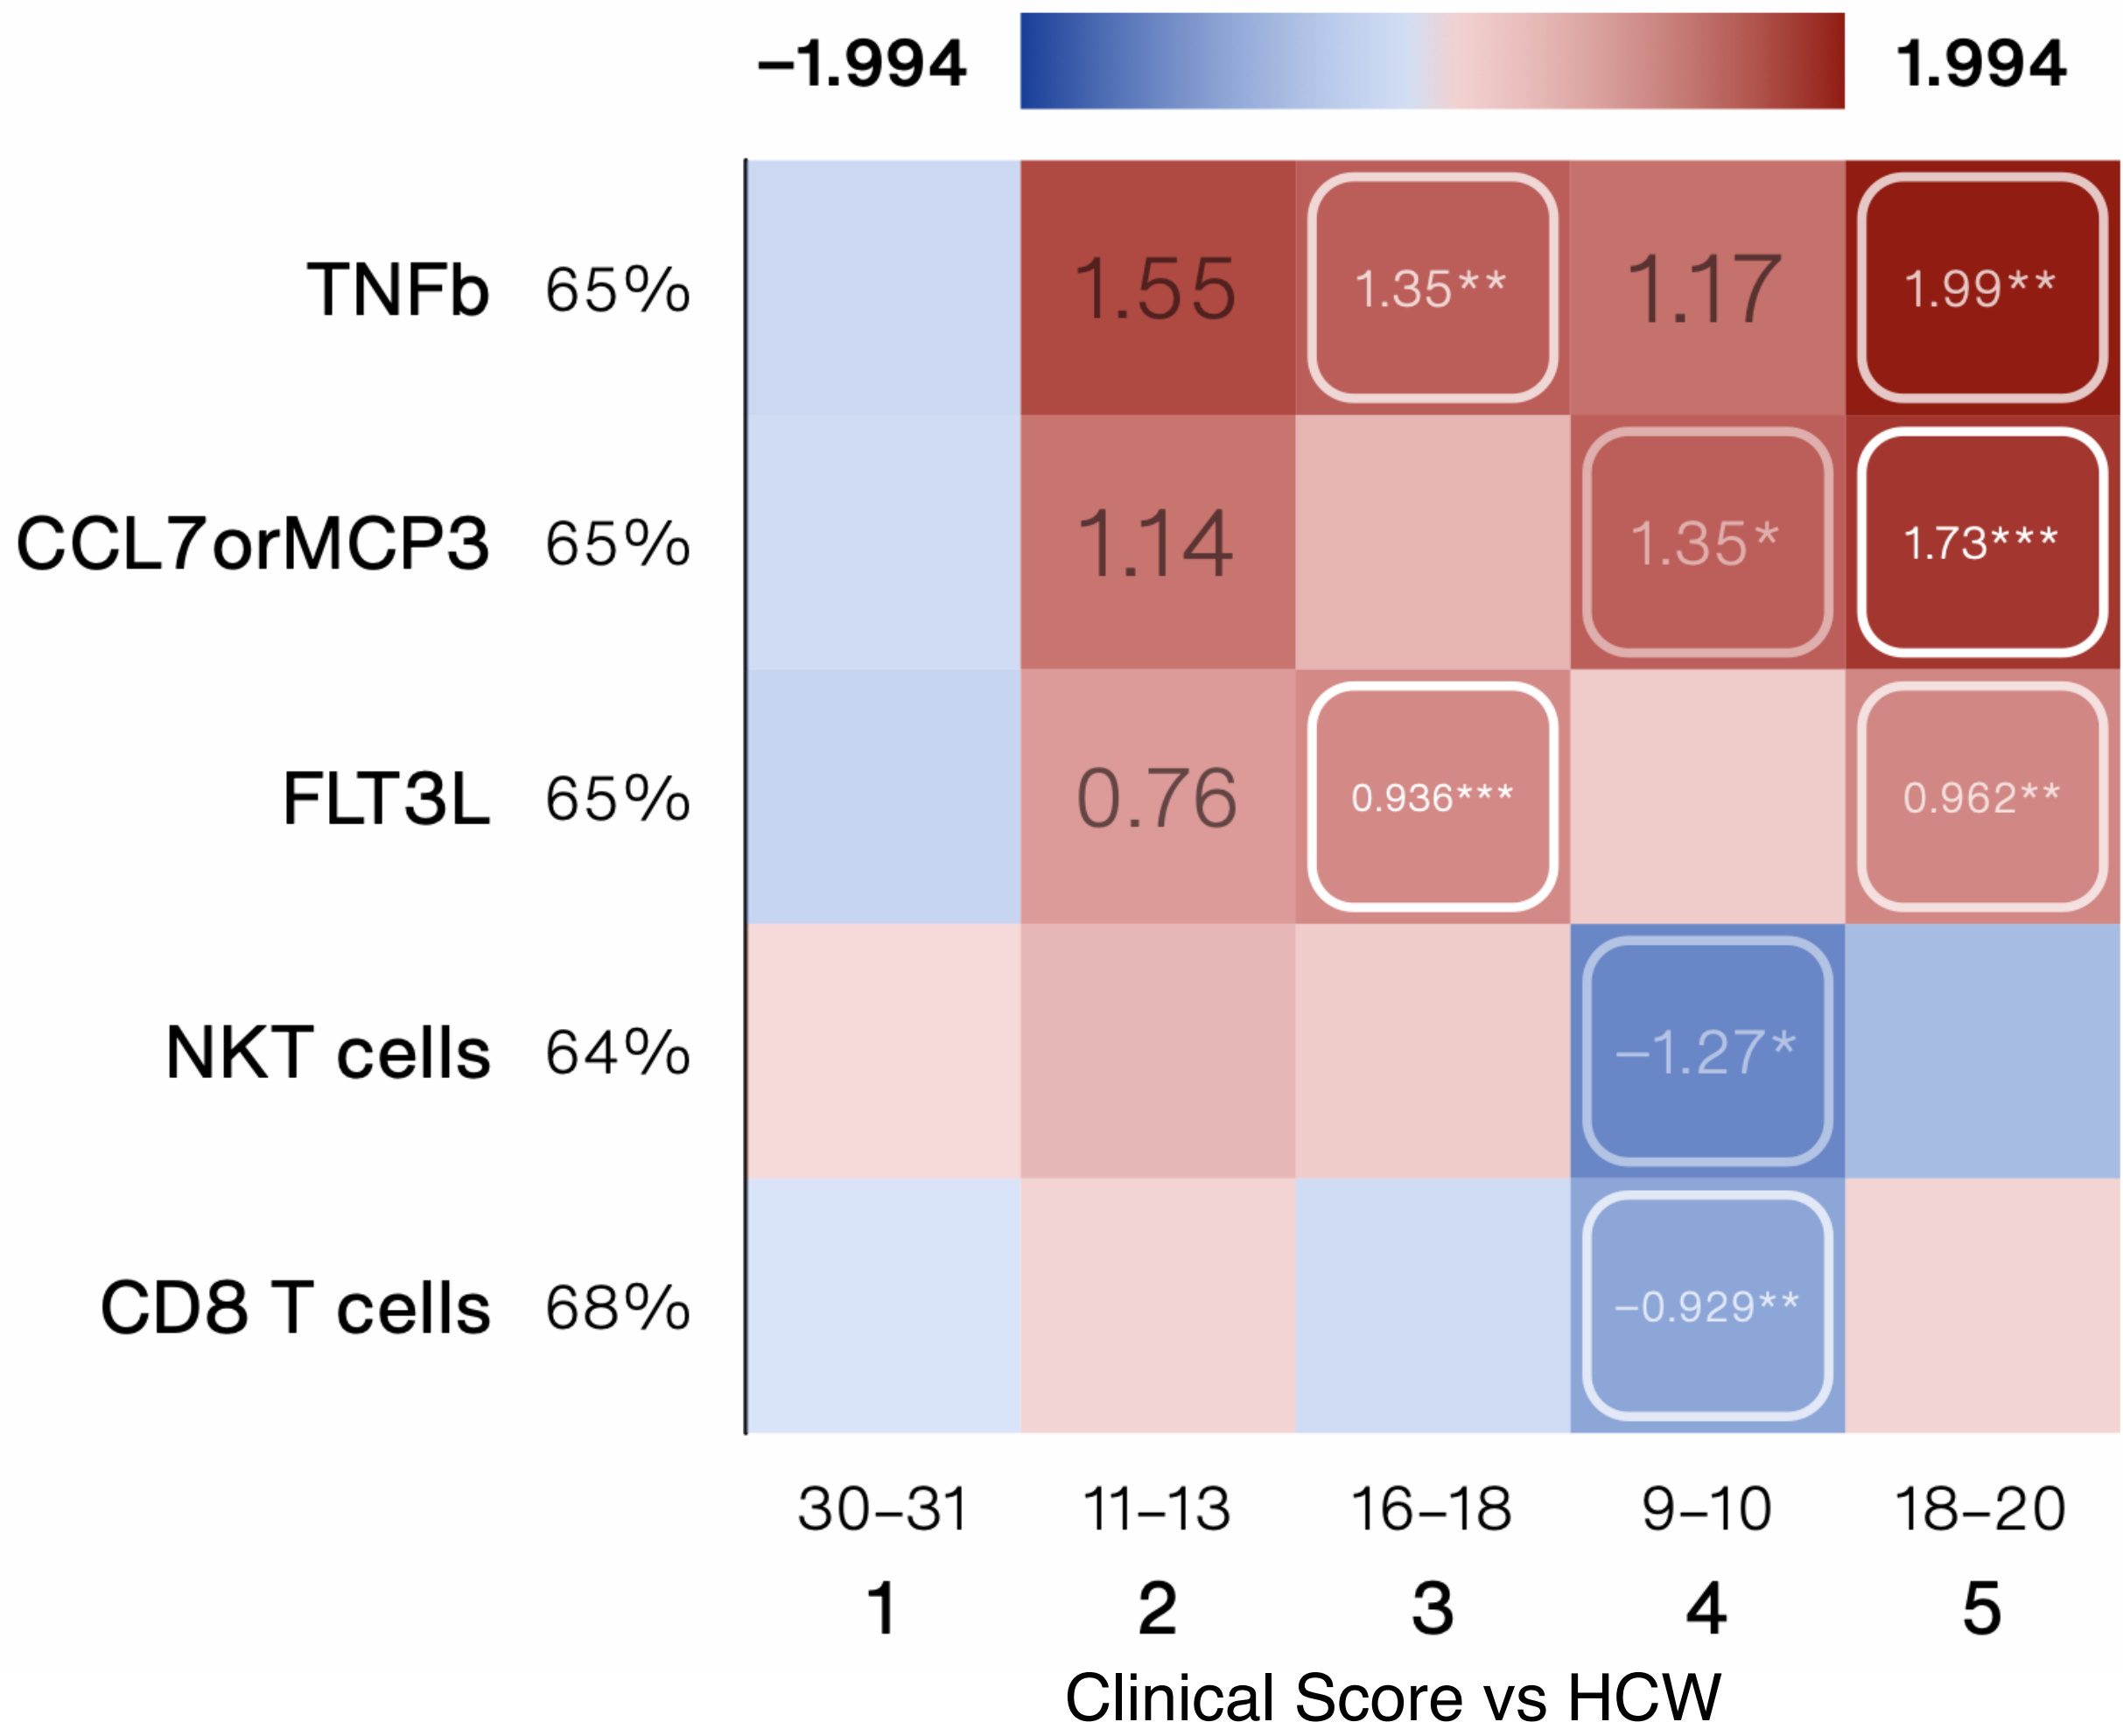

e.

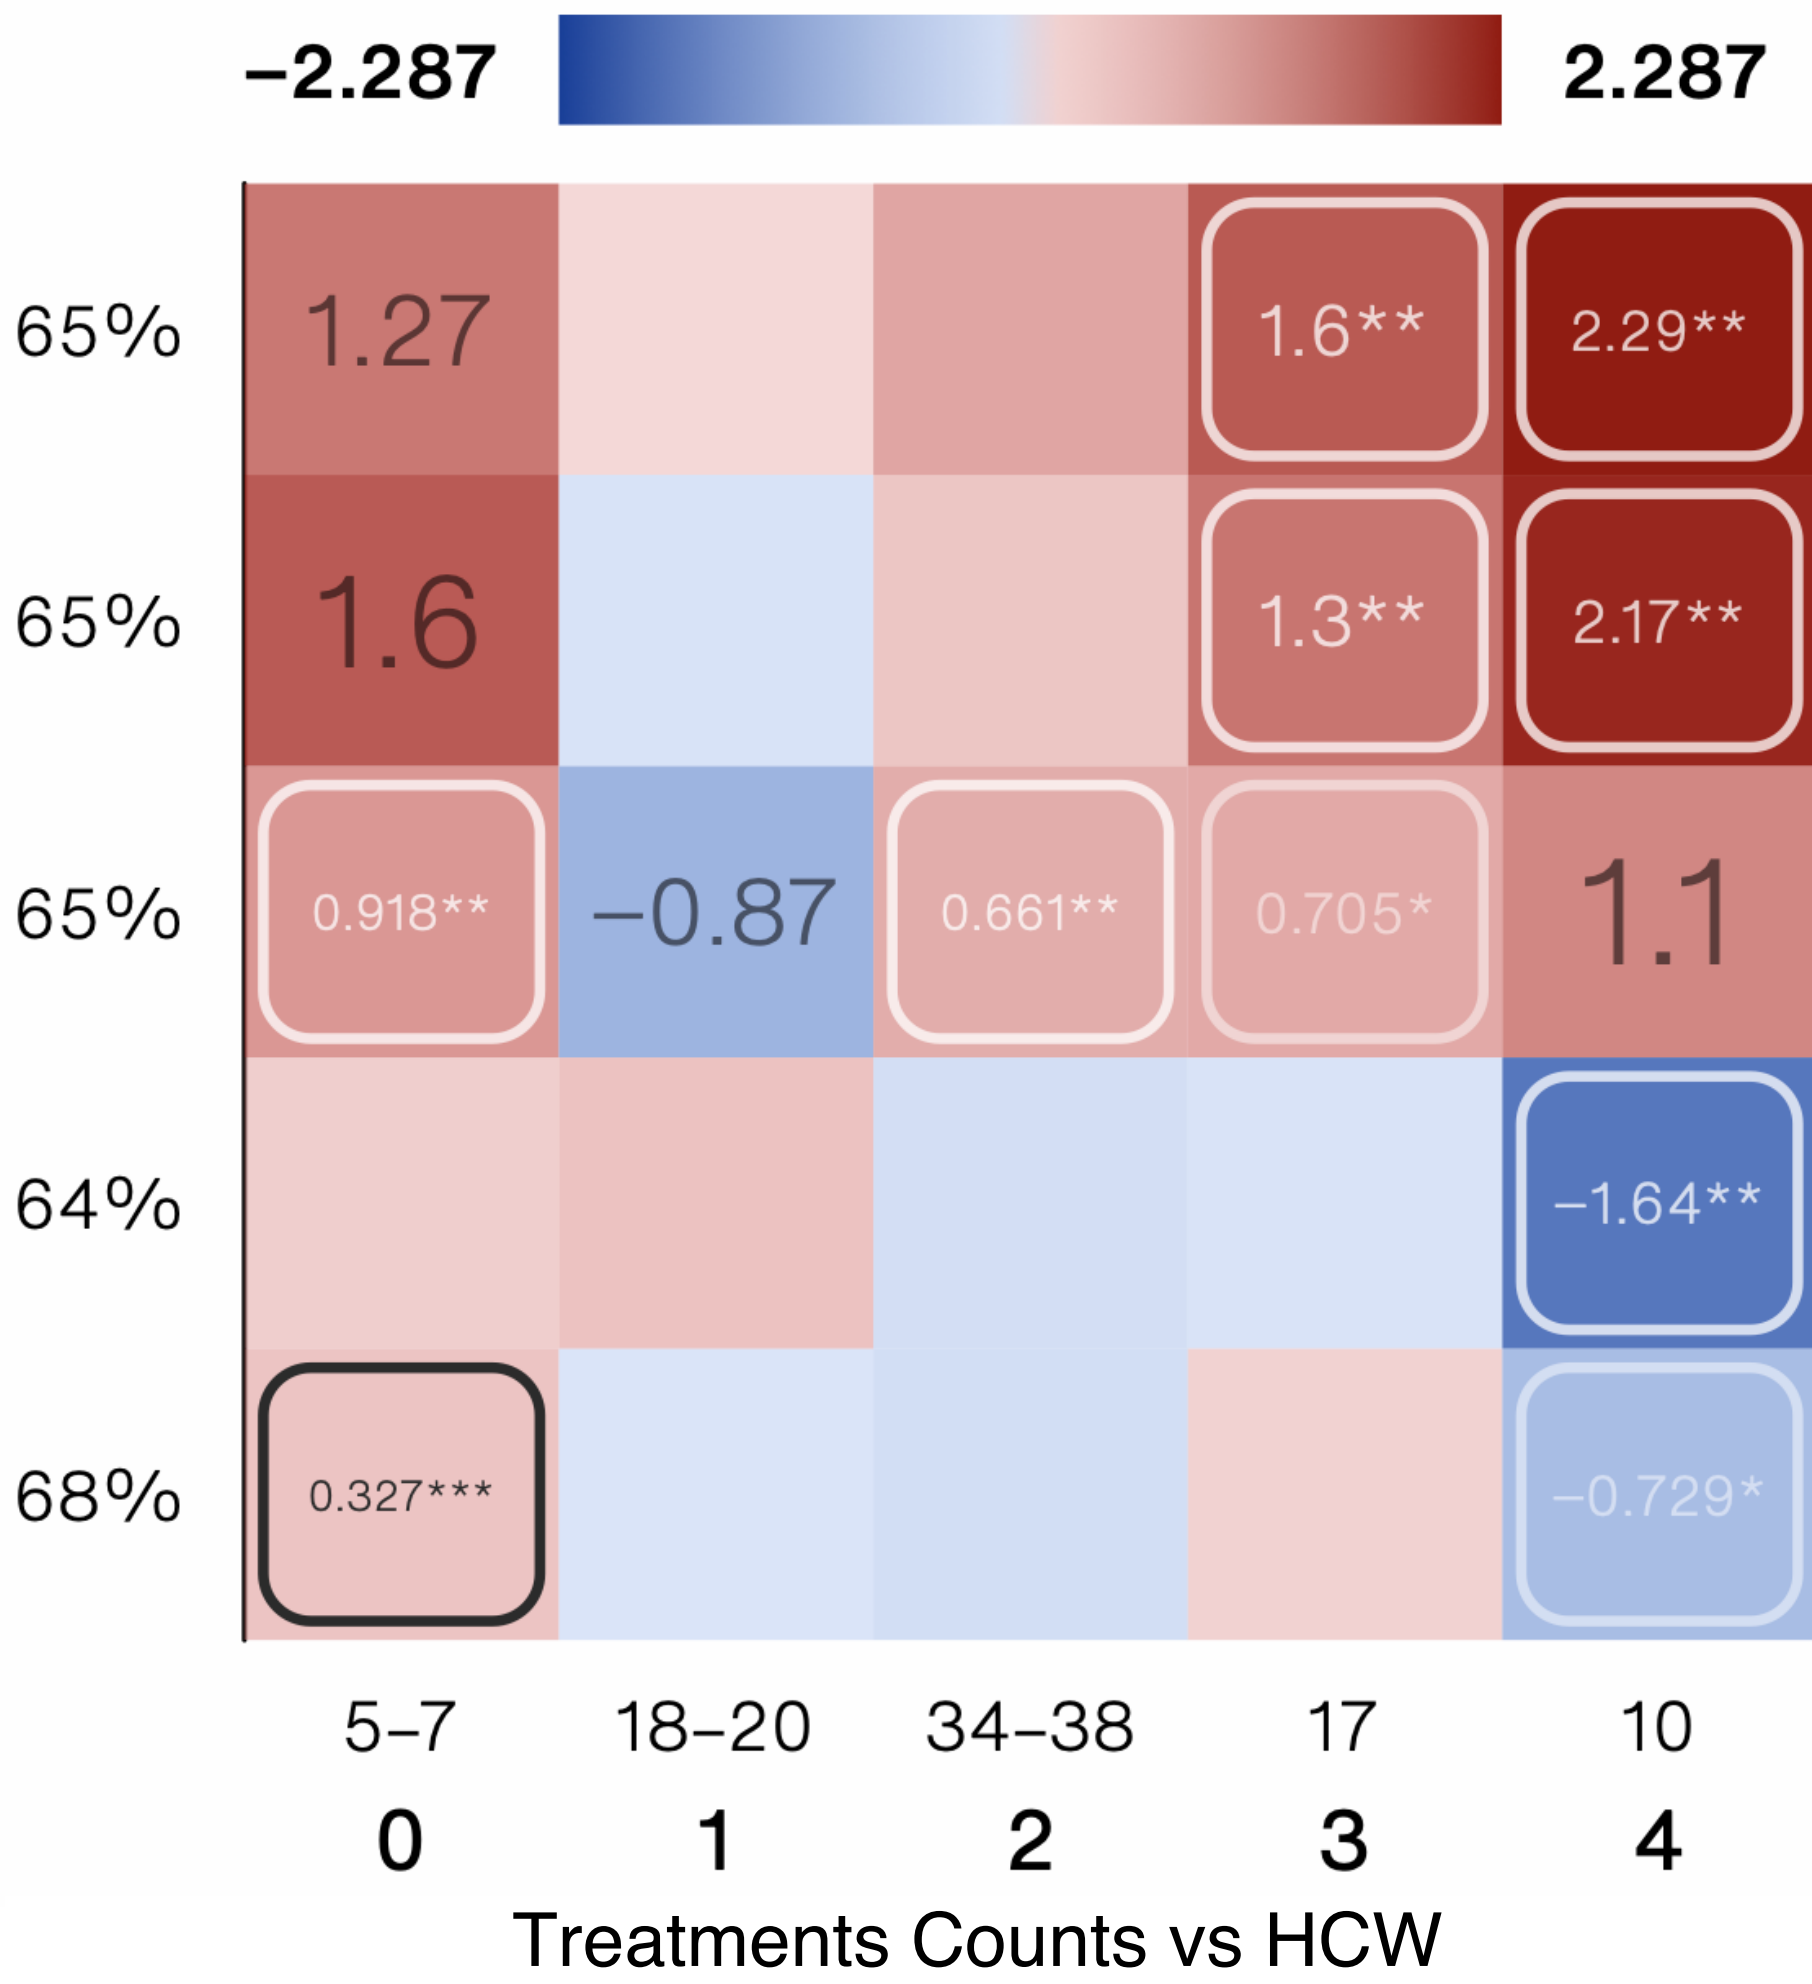

f.

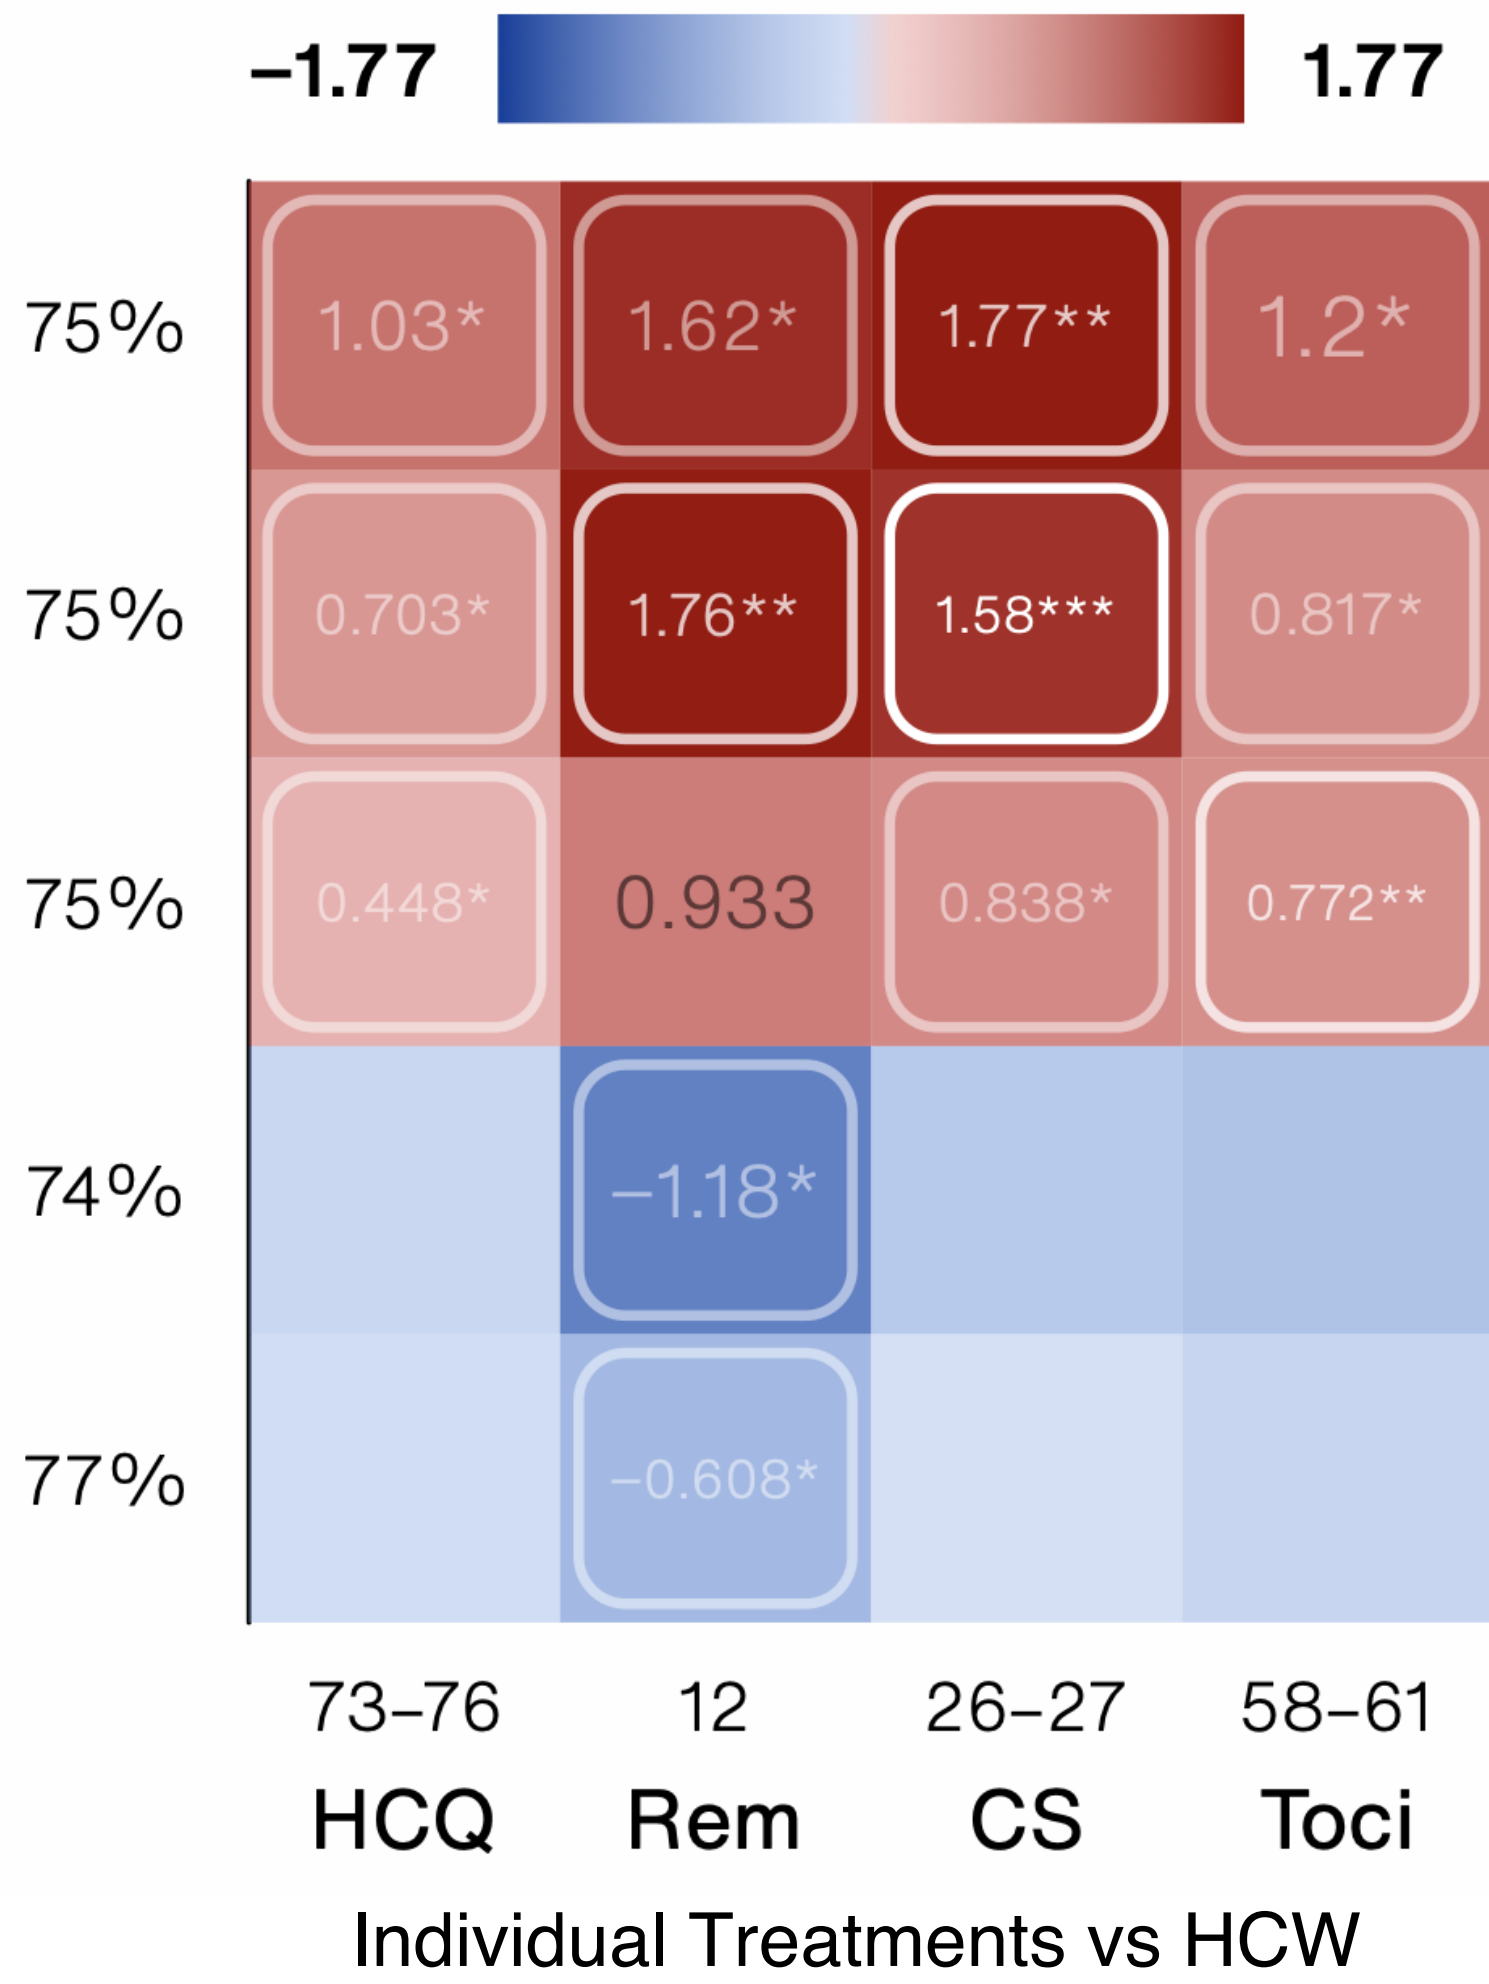



Fig.S6

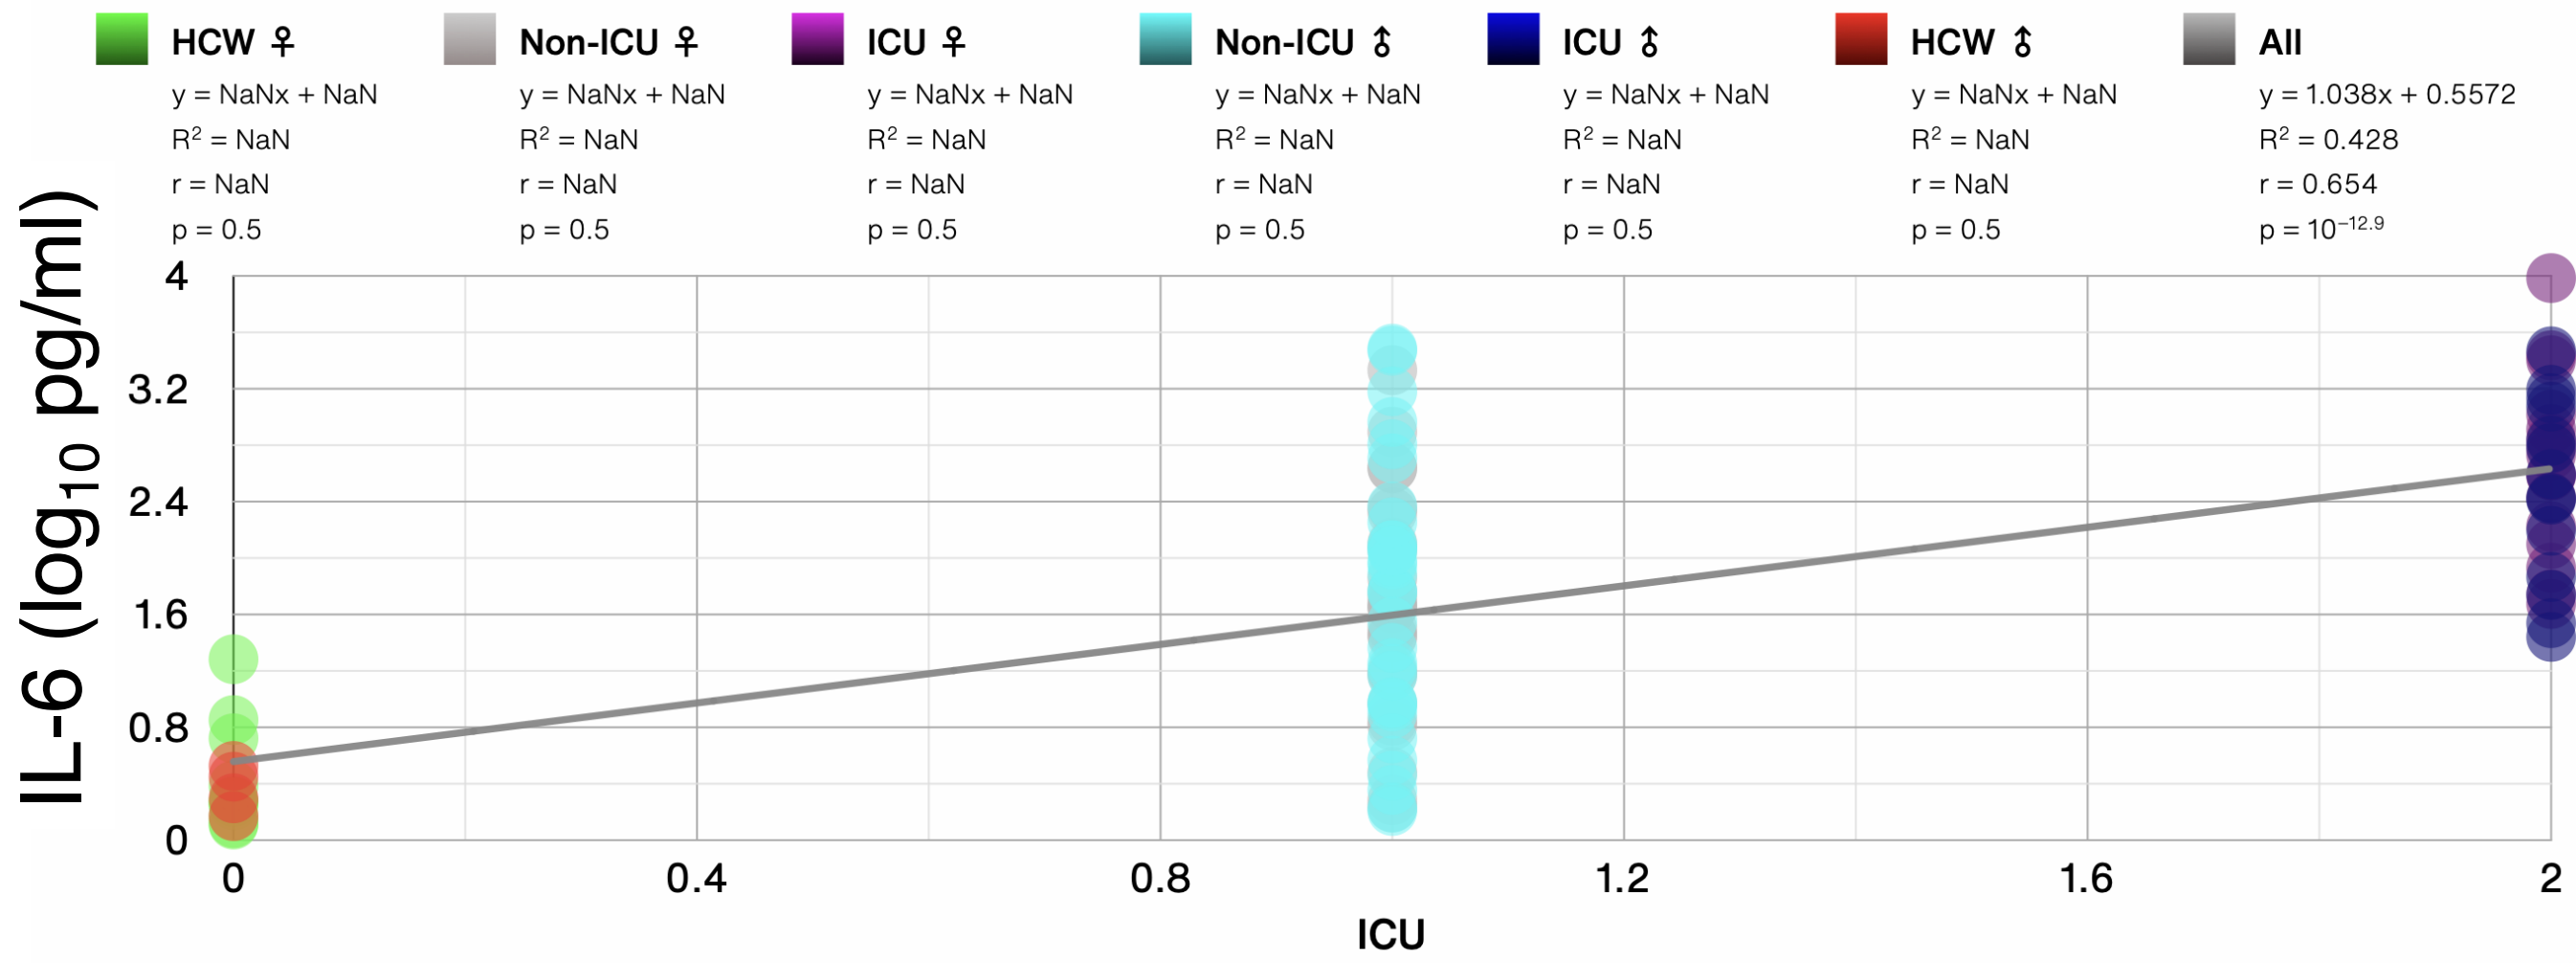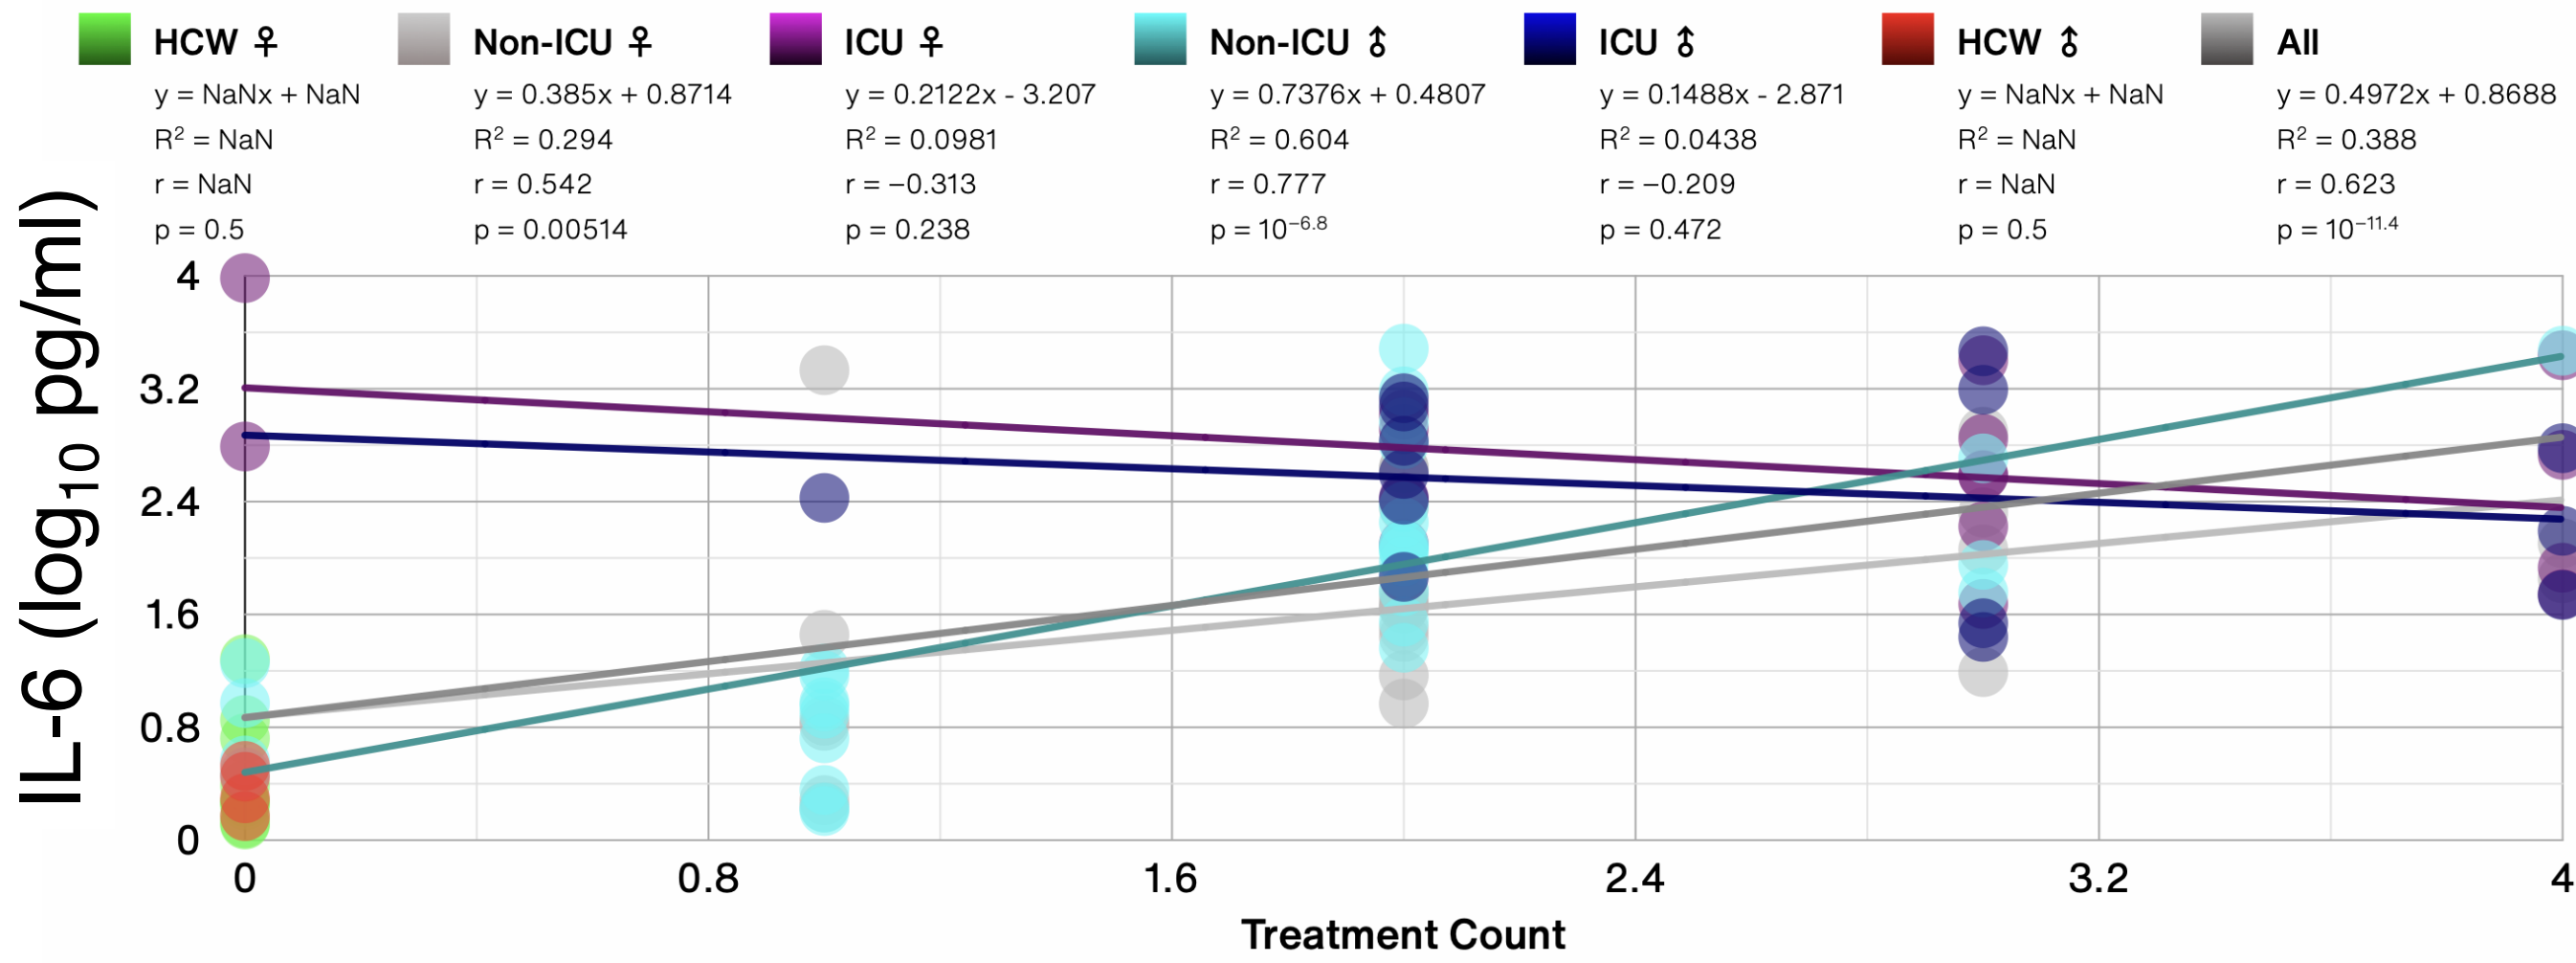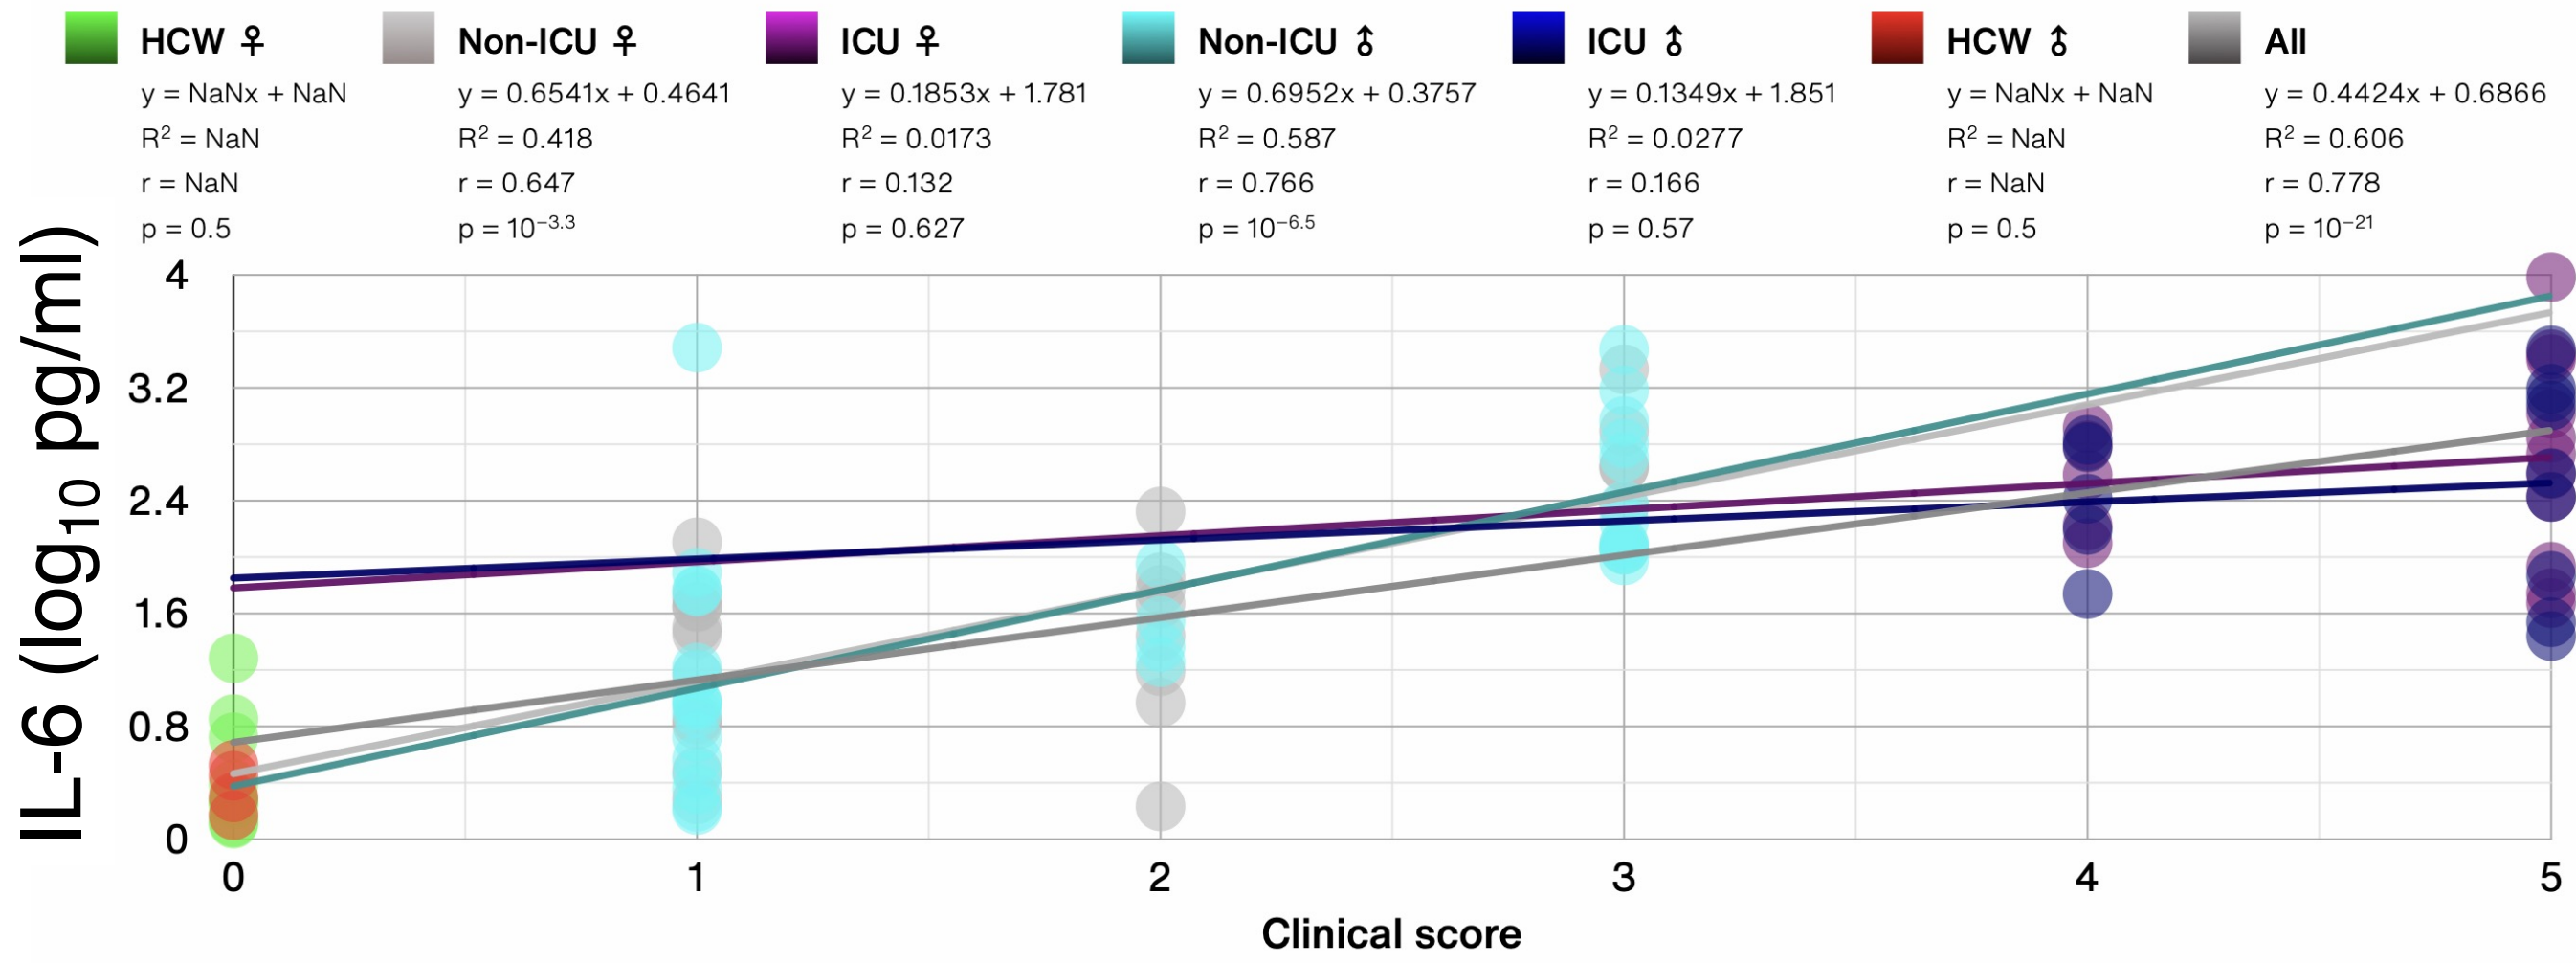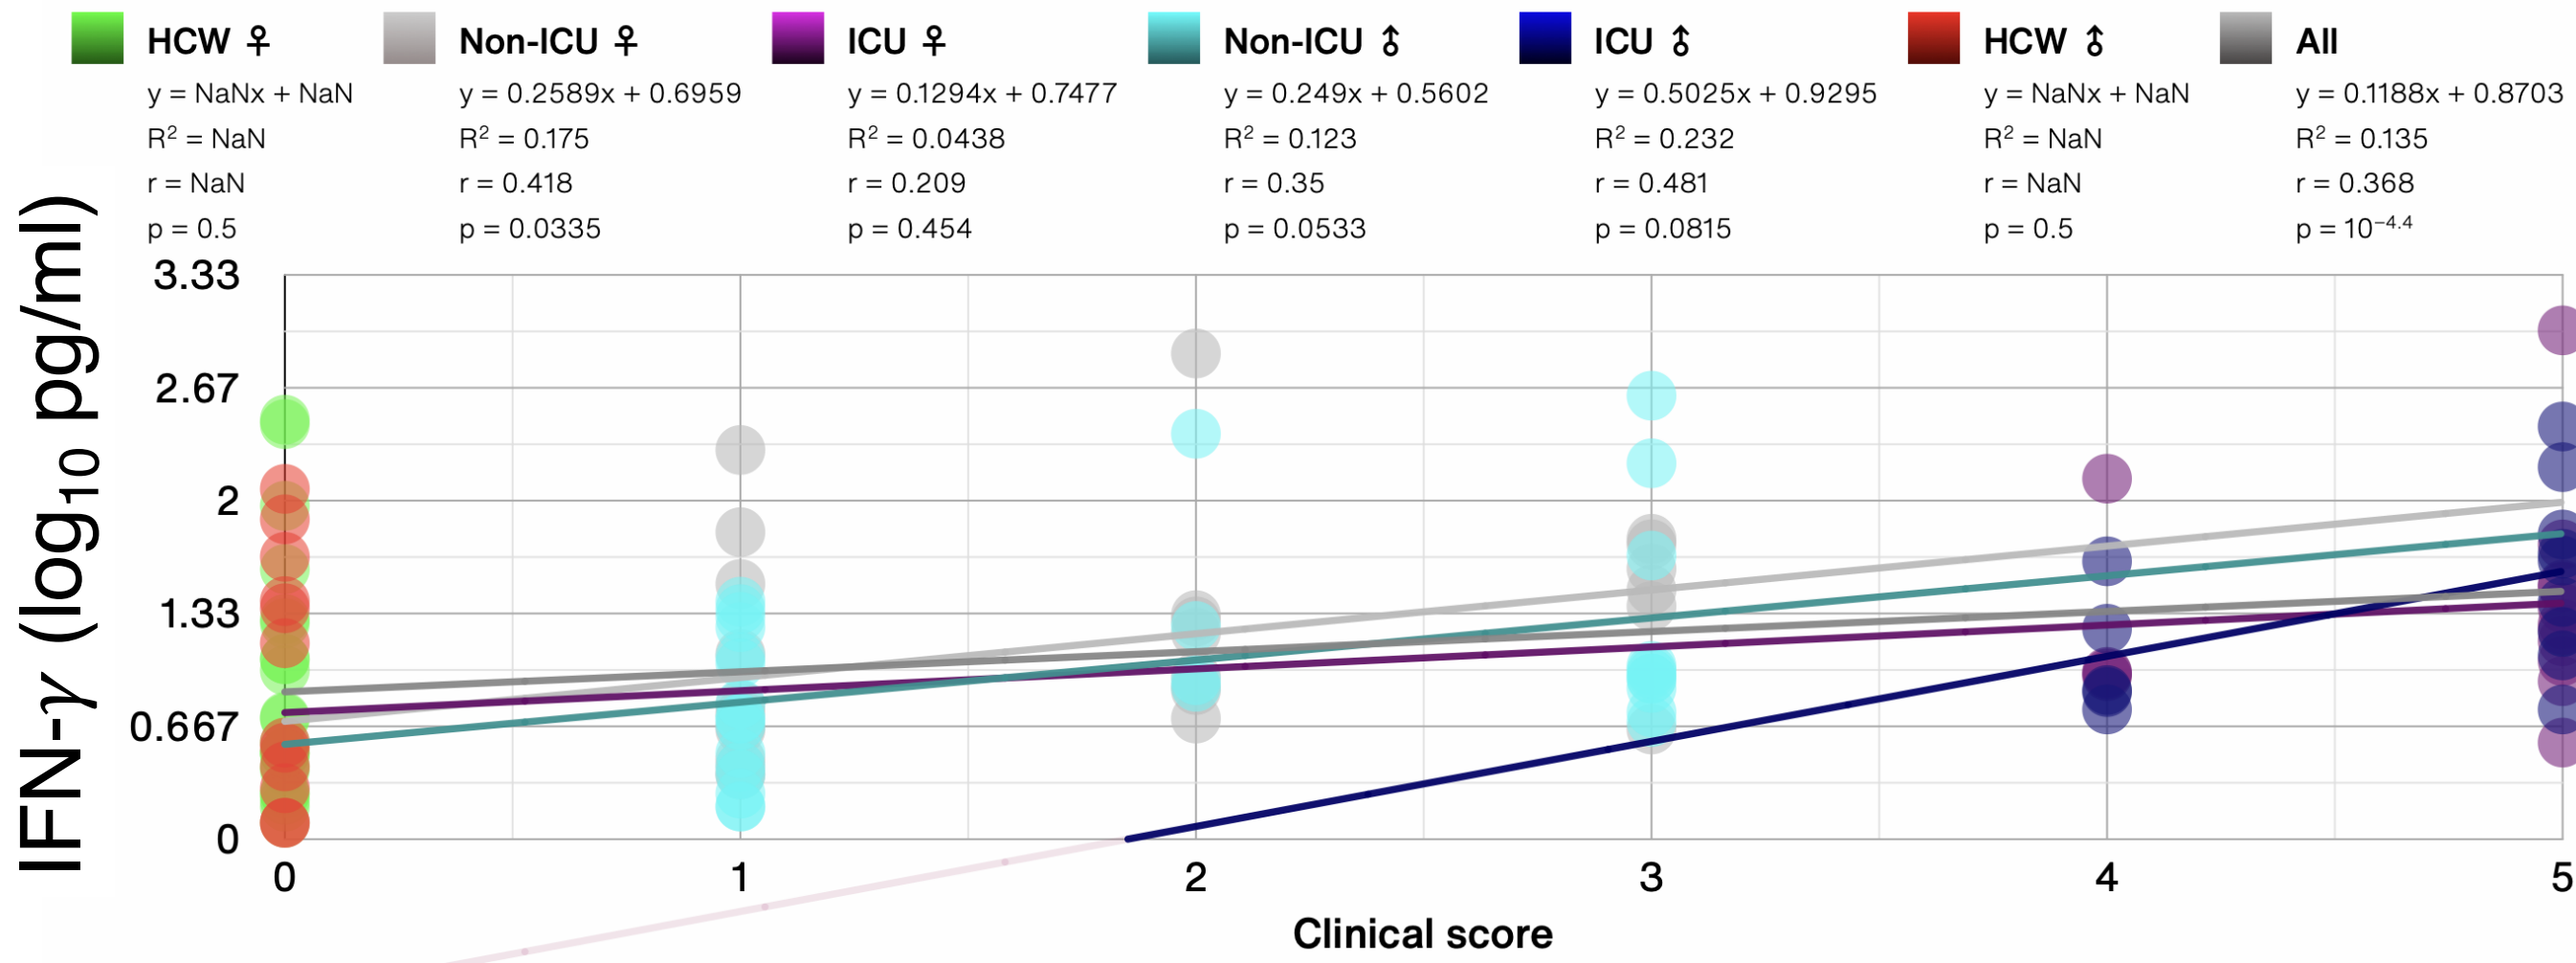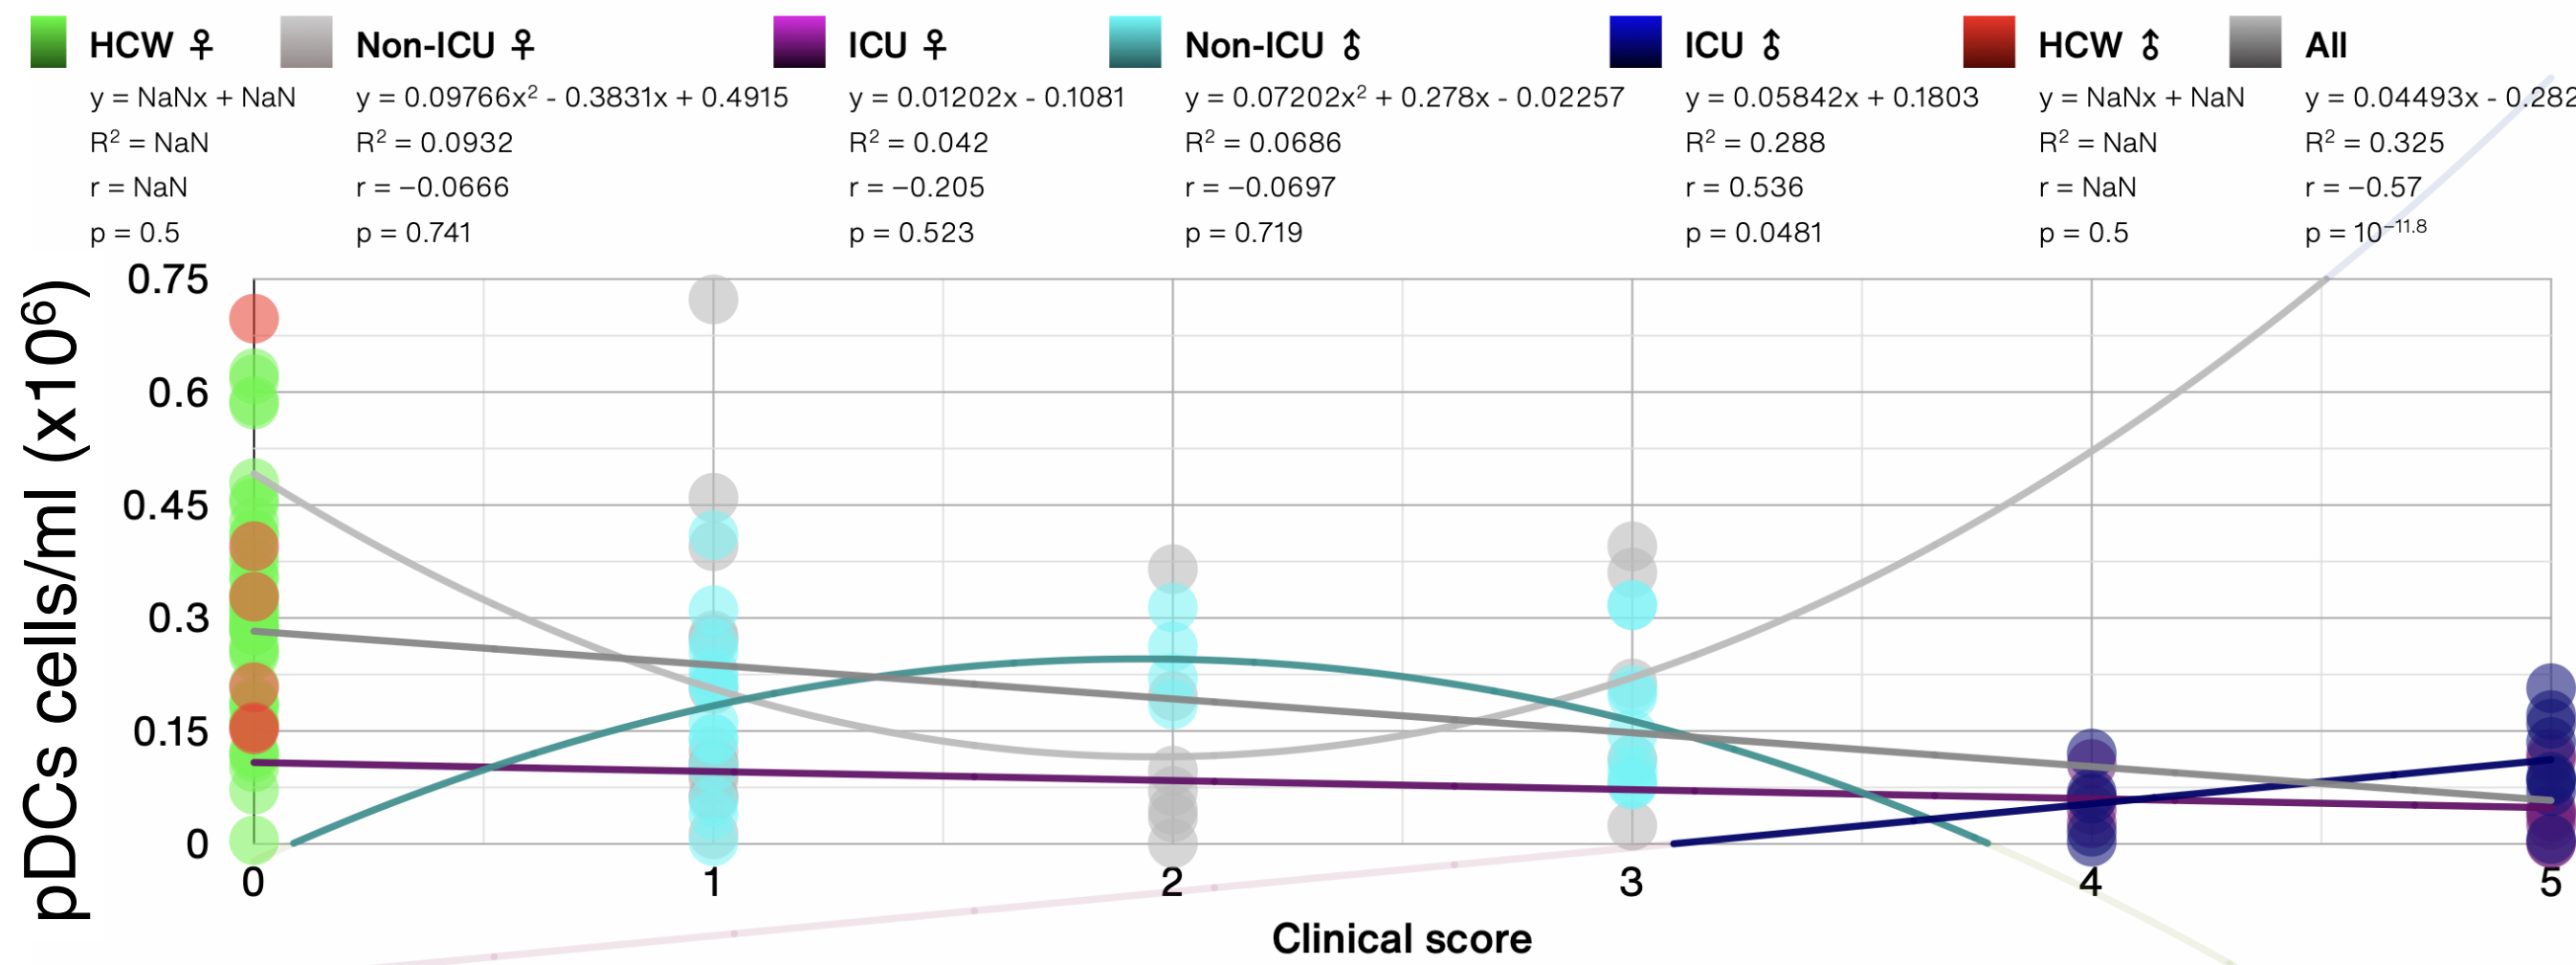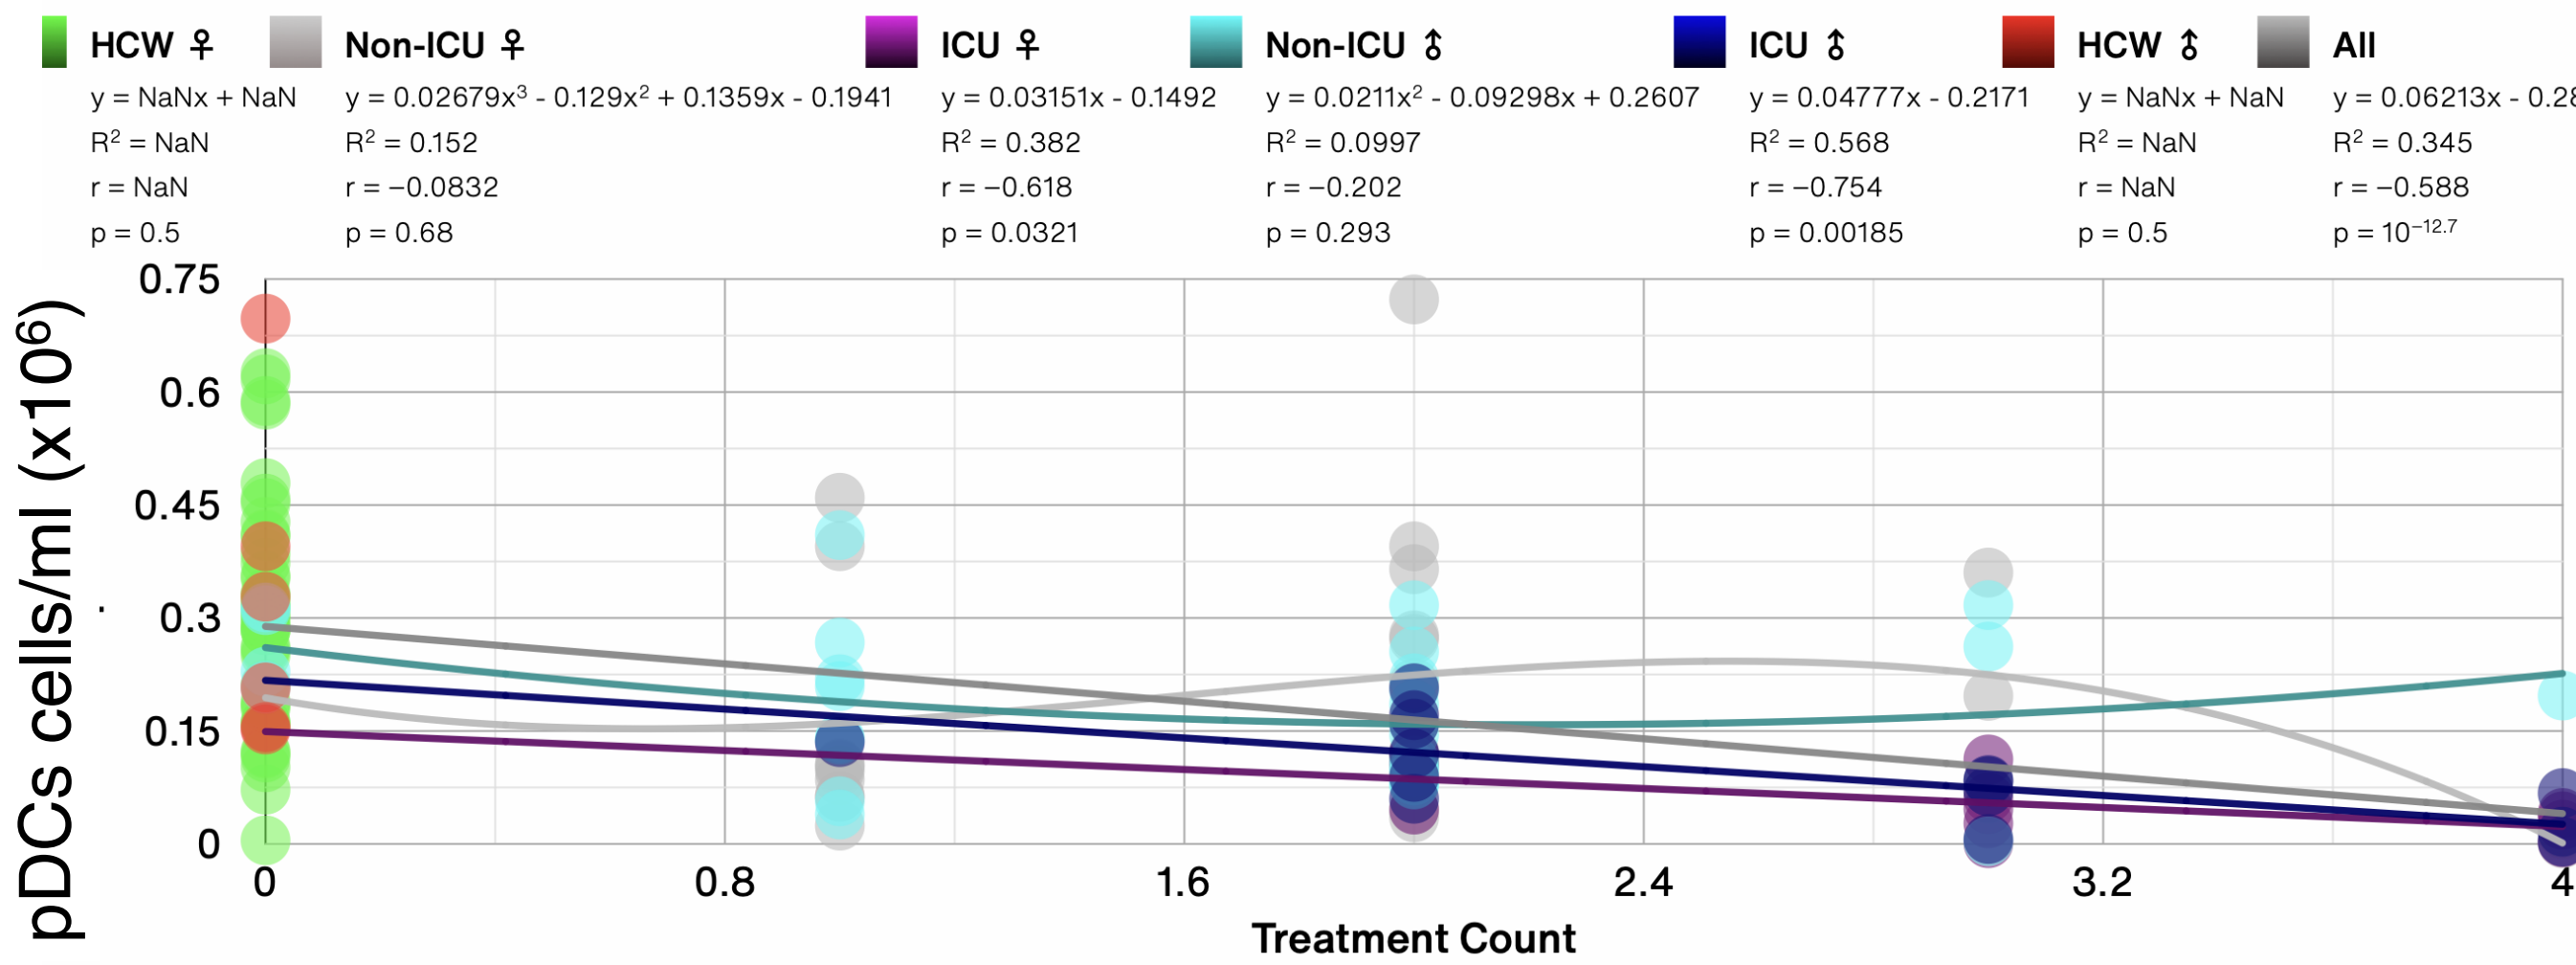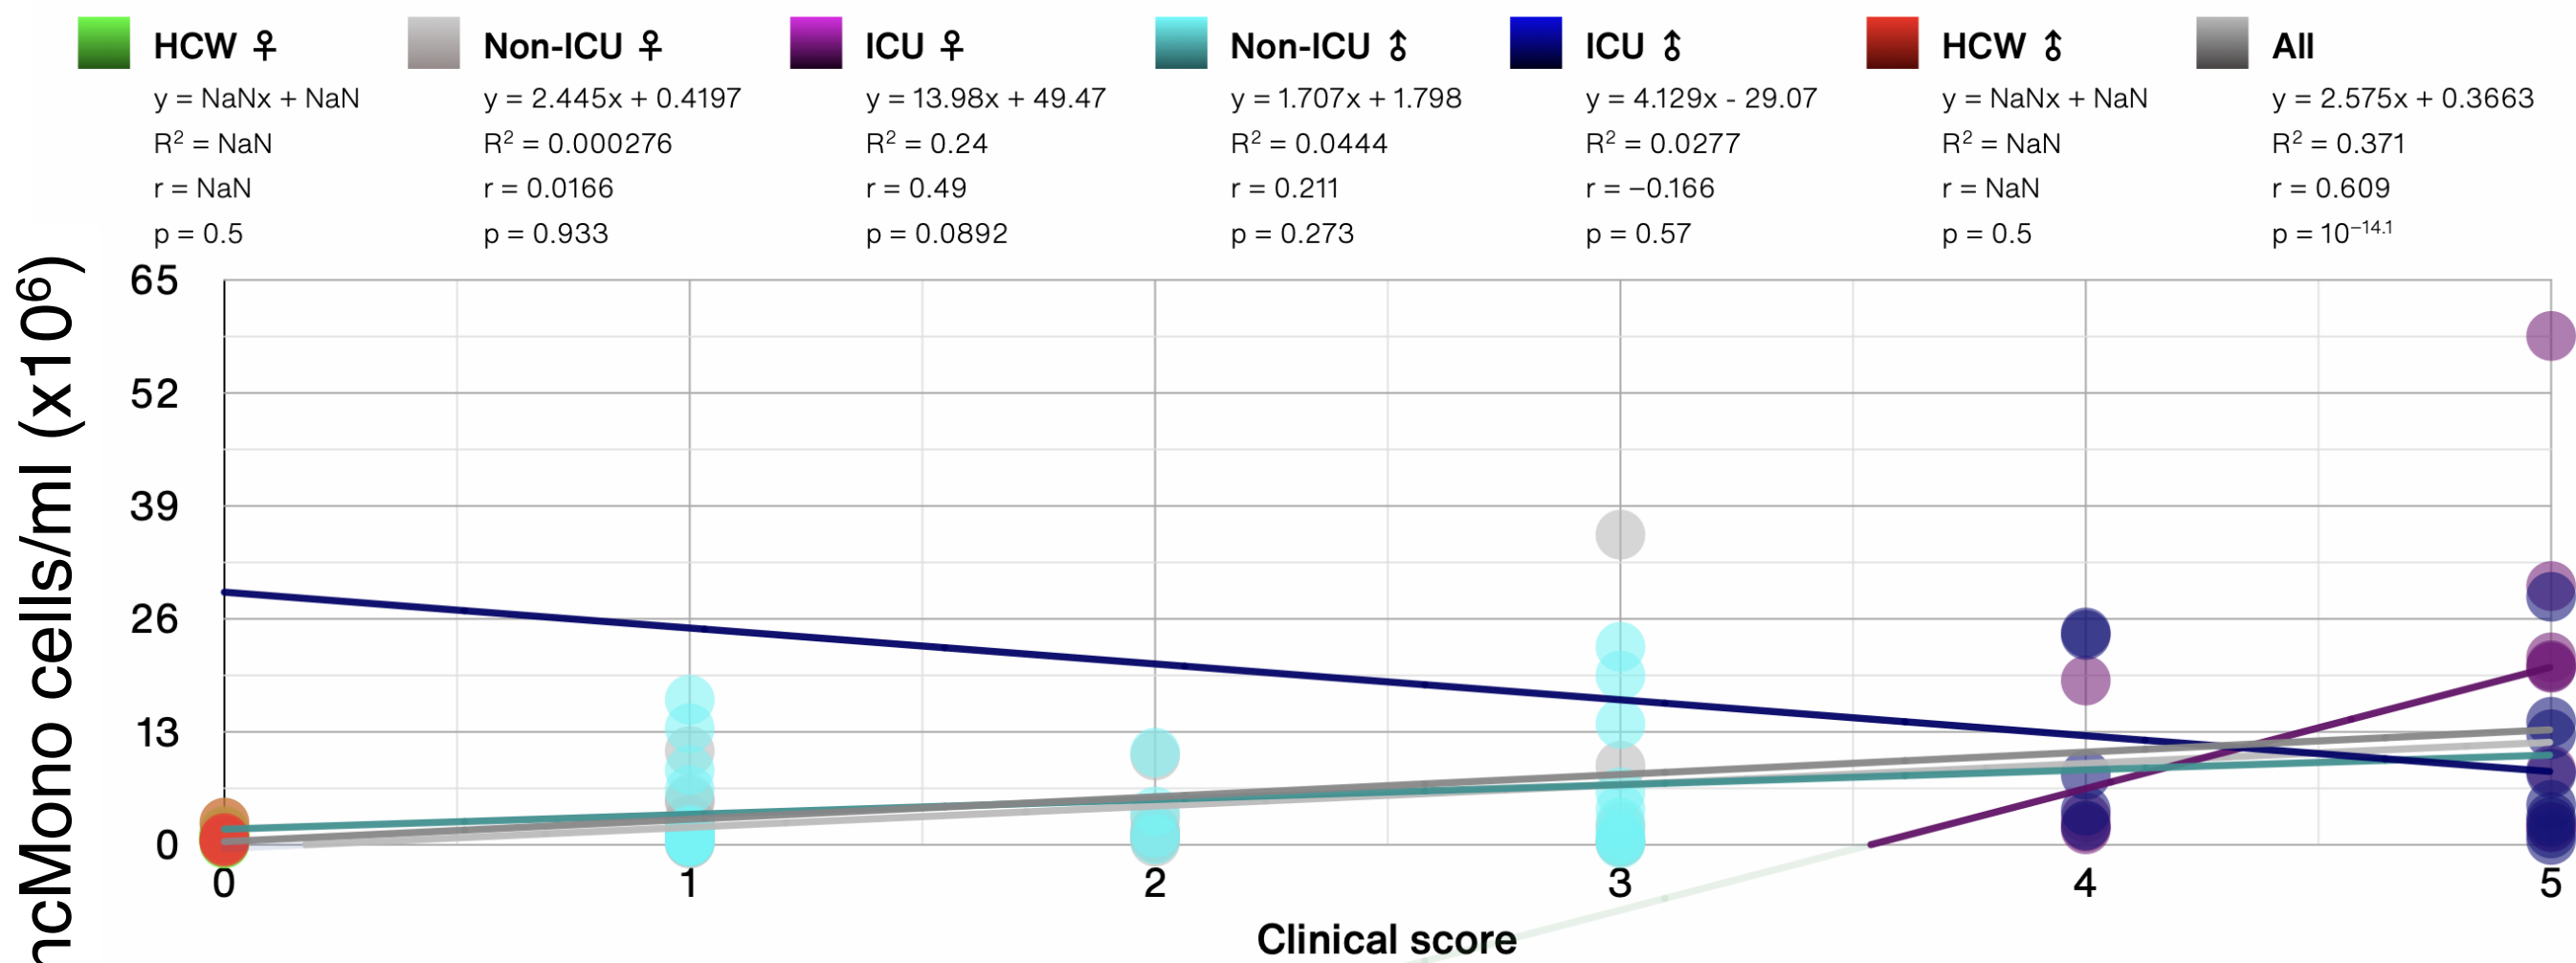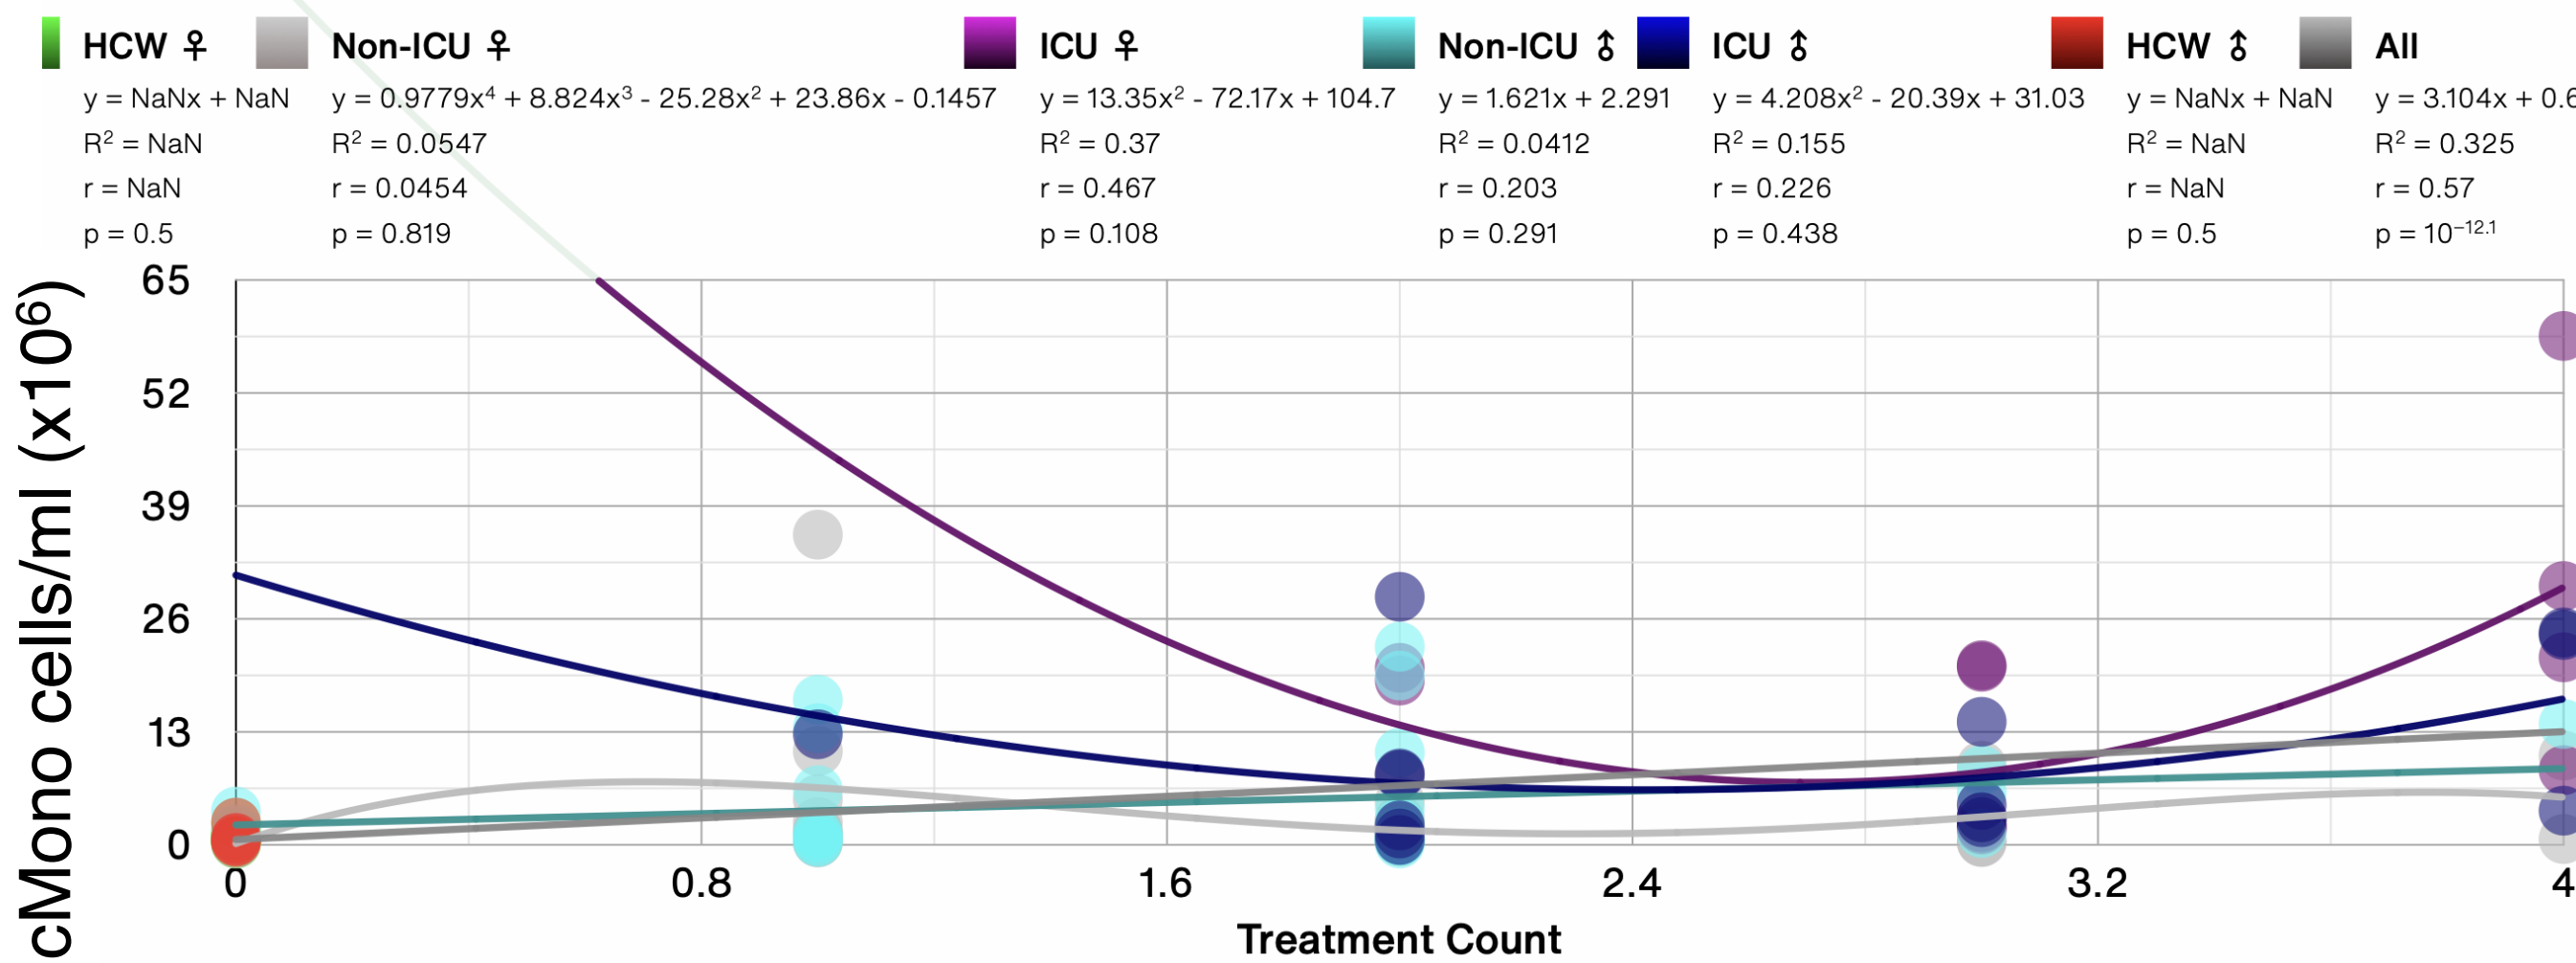

Supplement: s1 [file s1]
