# Supplementary material for: Immunological Misfiring and Sex Differences/Similarities in Early COVID-19 Studies: Missed Opportunities of Making a Real IMPACT
Source: MDPI journal article supplement (doi:10.3390/cells12222591), 2023-11-08
Supplement: s1 [file s1]

Breakdown of a total of 179\* data points from a total of 98 patients. Two or more longitudinal data points were collected from a total of 59 patients that were hospitalized in Yale between March and May of 2020.

\*: DFSO for a few patients were missing/not reported and hence those patients were not included in our analysis for DFSO. Numbers in parenthesis (0) indicates patients with confirmed 0 values for viral load in both saliva and Np samples. Missing values represent samples was not collected and/or tested. The numbers in the middle column is the actual patients used in our reanalysis.

| DFSO  | Patient Data Points |        |      | S or Nps> 0 |        |      | S or Nps = Missing/0 |         |         |
|-------|---------------------|--------|------|-------------|--------|------|----------------------|---------|---------|
|       | Both                | Female | Male | Both        | Female | Male | Both                 | Female  | Male    |
| 1-3   | 6                   | 5      | 1    | 3           | 2      | 1    | 3 (2)                | 3 (2)   | 0 (0)   |
| 4-6   | 14                  | 7      | 7    | 11          | 5      | 6    | 3 (0)                | 2 (0)   | 1 (0)   |
| 7-10  | 37                  | 18     | 19   | 19          | 8      | 11   | 16 (8)               | 10 (6)  | 6 (2)   |
| 11-14 | 44                  | 21     | 23   | 26          | 12     | 14   | 18 (8)               | 7 (2)   | 11 (6)  |
| 15-21 | 44                  | 27     | 17   | 25          | 16     | 9    | 18 (6)               | 13 (3)  | 5 (3)   |
| 22-27 | 19                  | 11     | 8    | 4           | 1      | 3    | 18 (3)               | 10 (1)  | 8 (2)   |
| ≥ 28  | 15                  | 7      | 8    | 5           | 2      | 3    | 10 (2)               | 5 (1)   | 5 (1)   |
| TOTAL | 179                 | 96     | 83   | 93          | 46     | 47   | 86 (29)              | 50 (15) | 36 (14) |

[illegible]
